# Supplementary material for: Barriers and facilitators to employment for young adults with mental illness: a scoping review
Source: PubMed Central journal article supplement — BMJ Open. 2018 Dec 18;8(12):e024487. doi: 10.1136/bmjopen-2018-024487 (PMC6303634; doi:10.1136/bmjopen-2018-024487), 2018-12-18
Supplement: bmjopen-2018-024487.draft_revisions.pdf [file bmjopen-2018-024487.draft_revisions.pdf]

# BMJ Open

BMJ Open is committed to open peer review. As part of this commitment we make the peer review history of every article we publish publicly available.

When an article is published we post the peer reviewers' comments and the authors' responses online. We also post the versions of the paper that were used during peer review. These are the versions that the peer review comments apply to.

The versions of the paper that follow are the versions that were submitted during the peer review process. They are not the versions of record or the final published versions. They should not be cited or distributed as the published version of this manuscript.

BMJ Open is an open access journal and the full, final, typeset and author-corrected version of record of the manuscript is available on our site with no access controls, subscription charges or pay-per-view fees (<http://bmjopen.bmj.com>).

If you have any questions on BMJ Open's open peer review process please email [info.bmjopen@bmj.com](mailto:info.bmjopen@bmj.com)

# BMJ Open

## Barriers and Facilitators to Employment for Young Adults with Mental Illness: A Scoping Review

|                               |                                                                                                                                                                                                                                               |
|-------------------------------|-----------------------------------------------------------------------------------------------------------------------------------------------------------------------------------------------------------------------------------------------|
| Journal:                      | <i>BMJ Open</i>                                                                                                                                                                                                                               |
| Manuscript ID                 | bmjopen-2018-024487                                                                                                                                                                                                                           |
| Article Type:                 | Research                                                                                                                                                                                                                                      |
| Date Submitted by the Author: | 29-May-2018                                                                                                                                                                                                                                   |
| Complete List of Authors:     | Gmitroski, Taryn<br>Bradley, Christl<br>Heinemann, Lyn<br>Liu, Grace<br>Blanchard, Paige<br>Beck, Charlotte<br>Mathias, Steve<br>Leon, Adelena<br>Barbic, Skye; University of British Columbia, Occupational Science and Occupational Therapy |
| Keywords:                     | employment, young adults, scoping review                                                                                                                                                                                                      |
|                               |                                                                                                                                                                                                                                               |

SCHOLARONE™  
Manuscripts

# Barriers and Facilitators to Employment for Young Adults with Mental Illness:

## A Scoping Review

Taryn Gmitroski<sup>1,2</sup>, Christl Bradley<sup>1,2</sup>, Lyn Heinemann<sup>3</sup>, Grace Liu<sup>4,5</sup>, Paige Blanchard<sup>4,5</sup>,  
Charlotte Beck<sup>6</sup>, Steve Mathias<sup>1,5,7</sup>, Adelen Leon<sup>1,2</sup>, Skye P. Barbic, PhD<sup>1,2,5,6</sup>

<sup>1</sup> Faculty of Medicine, University of British Columbia, Vancouver, BC, Canada

<sup>2</sup> Department of Occupational Science and Occupational Therapy, UBC, Vancouver, BC, Canada

<sup>3</sup> Canadian Mental Health Association, Vancouver, BC, Canada

<sup>4</sup> Providence Health, Vancouver, BC, Canada

<sup>5</sup> Foundry, Vancouver, British Columbia, Canada

<sup>6</sup> University of British Columbia, Vancouver, BC, Canada

<sup>7</sup> Centre for Health Evaluation and Outcome Sciences, Vancouver, British Columbia, Canada

<sup>8</sup> Department of Psychiatry, St. Paul's Hospital

### Address correspondence to:

Skye Barbic, PhD, OT

Assistant Professor

Faculty of Medicine

Department of Occupational Science and Occupational Therapy

The University of British Columbia | St. Paul's Hospital

2255 Wesbrook Mall | Vancouver, BC Canada V6T 2A1

Phone 778-846-6134 | Fax 604-822-7756

skye.barbic@ubc.ca

**Keywords:** Young Adults, Employment, Mental Health, Barriers, Facilitators, Review

**Word count:** 3682

**Funding Statement:** This research received no specific grant from any funding agency in the public, commercial or not-for-profit sectors.

**Competing interests statement.** All authors declare that none have any conflict of interest related to the development or publishing of this manuscript.

**ACKNOWLEDGEMENTS:** Appreciation is extended to Dr. Letitia Henville, Department of Occupational Science and Occupational Therapy, University of British Columbia, for editorial support.

## ABSTRACT

**Objectives:** The issue of gaining employment for those with mental illness is a growing global concern. For many in the young adult population, who are at a transitional age, employment is a central goal. In response, we conducted a scoping review to answer the question, “What are the barriers and facilitators to young adults with mental illness seeking employment?”

**Design:** We conducted a scoping review in accordance to the Arksey and O’Malley framework. We performed a thorough search of Medline, EMBASE, CINAHL, ABI/INFORM, PsycINFO, and Cochrane.

**Results.** Our search resulted in 19 research articles that focused on employment for young adults with mental illness. Four main themes were extracted from the literature: (1) employment intervention in addition to treatment as usual, (2) age-related components of employment, (3) positive perception of self, and (4) ongoing support.

**Conclusions.** Our review suggests that the employment goals of young adults with mental illness are important should be recognized by the mental health system as a social determinant of health. Aligning the mental health and employment priorities of young adults may enable efficiency in achieving improved health and social outcomes for this population while promoting greater engagement of young adults in care.

### **Strengths and limitations of the study:**

- Comprehensive summary of the barriers and facilitators to employment for young adults with mental illness.
- Scoping review according to published guidelines
- Full-text review and data extraction completed by two reviewers
- No quality of appraisal of the included studies

## INTRODUCTION

Mental illness is a widespread global challenge that affects approximately 1 in 4 young people at some point in their lives<sup>1-3</sup> with 12–24 year olds experiencing the highest incidence of mental disorders of any age group.<sup>4 5</sup> Adolescence and early adulthood are considered the peak periods for the onset of mental illness, with 75% of all diagnoses having an onset before the age of 25 years.<sup>6-8</sup> Mental illness in young adults affects all education and income levels and all cultures.<sup>5 6</sup> <sup>9</sup> The global economic and societal burden of mental health disorders for this age group is rising at an alarming rate.<sup>9 10</sup> Nevertheless, this age group has been shown to have the greatest challenge in accessing mental health services.<sup>11 12</sup> Global mental health services have been described as “largely inadequate and unsuited to their [age-related] needs”.<sup>13 14</sup> There is an international call to urgently reexamine how mental health services are delivered for youth.<sup>10 12</sup> <sup>15-20</sup> In order to reduce the impact of mental illness, and to increase the likelihood of recovery for young people, transformative change and service redesign are necessary.<sup>21</sup>

Recovery, in the context of mental health care and psychosocial rehabilitation, is defined as “*the ability to live a full and meaningful life*”.<sup>22</sup> The greatest chance of recovery is associated with having an illness identified, receiving an intervention early, and accessing ongoing support.<sup>9 15 21 23-25</sup> One of the best indicators of recovery for all ages is the ability to obtain and maintain meaningful employment.<sup>11 26</sup> High-quality studies have repeatedly shown that employment is associated with reductions in negative symptoms associated with a diagnosis of a mental illness, improvement in overall well-being, and enhanced perception of social inclusion and self-worth.<sup>11 27-32</sup> Yet approximately 70-90% of people with a serious mental health condition are unemployed—this despite increasing evidence suggests that the majority of them desire to work<sup>33-35</sup>

1  
2  
3 As research continues to emerge regarding young adults with mental illness, there is a  
4 strong case for mental health services to integrate employment-support components within the  
5 current model of service delivery.<sup>36-39</sup> Incorporating employment into community mental health  
6 services for young adults may have a substantial impact at the individual, familial, and societal  
7 level, thereby advancing health-related outcomes for this population.<sup>40 41</sup> These impacts include  
8 decreased hospital admissions, interaction with the justice system, improved mental health, and  
9 reduction of costs to the system.<sup>28 42</sup> In order to strengthen the case for employment within the  
10 mental health services framework, it is vital to researchers, clinicians, and policy makers to  
11 understand the barriers and facilitators to employment for young adults with mental illness.  
12  
13  
14  
15  
16  
17  
18  
19  
20  
21  
22  
23

24 The goal of this work is to lay a foundation to understand the barriers and facilitators to  
25 employment for youth with mental illness. In this study, we outline the breadth of knowledge  
26 currently available regarding obtaining and maintaining employment for young adults with  
27 mental illness, as well as the implementation of programs designed to address the barriers  
28 identified.  
29  
30  
31  
32  
33  
34  
35

## 36 **METHODS**

37  
38 The aim of our scoping review was to draw on existing literature to understand what is known  
39 about the barriers and facilitators to employment for young adults with mental illnesses. As  
40 compared to systematic reviews, scoping reviews have a very broadly defined research question,  
41 include all study types, and track data according to key issues and themes.<sup>38</sup> We followed a five-  
42 stage methodological framework<sup>43</sup> to complete this review, including: (1) identification of the  
43 research question, (2) identification of all relevant studies, (3) selection of studies for detailed  
44 analysis, (4) charting of the data according to key concepts, and (5) collation and summarizing  
45 the findings of selected studies.  
46  
47  
48  
49  
50  
51  
52  
53  
54  
55  
56  
57  
58  
59  
60

1  
2  
3 For the first stage of the scoping review, the research question that guided the review  
4 was: “*What are the barriers and facilitators to employment for young adults?*” In order to ensure  
5 that all relevant studies were included in the search results, the terms were kept broad, and  
6 included “young adults,” “employment,” and “mental disorder.” The population included were  
7 young adults, aged 15–29 years of age with a mental health diagnosis, who are seeking  
8 employment. This age group was chosen in order to best reflect the challenges faced by those  
9 with an emerging mental illness who are attempting to seek paid work. The definitions of each  
10 aspect of the population, age, mental health status, and gaining employment, have been left broad  
11 in order to maintain a wide approach that generates a breadth of coverage of the topic.  
12  
13  
14  
15  
16  
17  
18  
19  
20  
21  
22  
23

24 In order to identify all relevant studies into this scoping review, stage two of this study  
25 included a search of the following databases on July 28, 2016: MEDLINE® (1946–July 2016),  
26 ABI/inform® (1986–July 2016), CINAHL® (1982–July 2016), Embase® (1974–July 2016),  
27 PsycINFO® (1880–July 2016), and Cochrane® (2005–July 2016) using the terms outlined in  
28 Table 1. The search terms were divided into the following three categories: age, employment,  
29 and mental illness. Each of these categories were then combined with “AND” to ensure that all  
30 articles selected addressed each of these key elements.  
31  
32  
33  
34  
35  
36  
37  
38  
39  
40

41 [insert Table 1 here]  
42  
43

44 Next, the researchers generated an extensive list of relevant search terms in order to  
45 include the greatest breadth of information, and to make sure to include valuable studies. In  
46 addition to searching the databases, we screened the reference lists of all relevant articles. A  
47 reference librarian was consulted in order to identify more search terms, exclude unnecessary  
48 ones, identify relevant databases, and build the search and protocol with the team (TG, CB, SB).  
49  
50  
51  
52  
53  
54  
55  
56  
57  
58  
59  
60

1  
2  
3 The initial cutoff day for this scoping review was July 28, 2016. A basic Google Scholar follow-  
4 up search was conducted on June 4, 2017, to ensure any new studies were included.  
5  
6  
7

8 The researchers used electronic databases, reference lists from previously found studies,  
9 and the technique of handpicking studies from key journals as needed. In the mid-1980s,  
10 researchers began to develop the framework for incorporating employment into mental health  
11 services for young adults. Given that the known research in this field began in the mid-1980s,  
12 our scoping review began to draw our research from this January 1985.  
13  
14  
15  
16  
17  
18  
19

20 For stage three of the scoping review, two research team members (TG & CB)  
21 independently screened all titles and abstracts of all studies identified in the electronic search.  
22 We included all relevant articles published in English or French that described employment  
23 services for young adults with mental illness. In addition, we limited our search to human  
24 subjects, and studies with young adults under 30 years old. We did not screen for methodology  
25 or levels of evidence.  
26  
27  
28  
29  
30  
31  
32  
33  
34

35 In order to chart the data, we synthesized the studies and sorted them according to key  
36 themes, barriers, and facilitators. We charted data based on author, year of publication, study  
37 location study type, intervention (if applicable), study population, and key results (barriers and  
38 facilitators to employment).  
39  
40  
41  
42  
43  
44

45 Finally, we synthesized and sorted data according to key issues and themes to present a  
46 narrative account of the existing literature.<sup>43</sup> The main purpose of this scoping review was to  
47 identify the breadth of literature in this area of study, and whether there are any gaps in service  
48 found within the subject matter. As a result, we did not complete an assessment of the quality of  
49  
50  
51  
52  
53  
54  
55  
56  
57  
58  
59  
60



1  
2  
3 evidence, nor did we determine whether particular studies provide robust or generalizable  
4  
5 findings.<sup>43</sup>  
6  
7

## 8 **RESULTS**

9

10  
11 The initial search in ABI/Inform®, PsycINFO®, MEDLINE®, Cochrane®, Embase® and  
12  
13 CINAHL®, using the search terms outlined above, generated a total of 8037 results. After  
14  
15 removing duplicates and performing a preliminary screen to ensure the inclusion criteria was  
16  
17 met, a total of 488 titles and abstracts were identified. These were further screened to ensure that  
18  
19 they addressed the appropriate age range, that they had a focus on employment, and that the  
20  
21 participants had a diagnosis of a mental illness. Manual screening performed by the researchers  
22  
23 generated a total of 33 articles that were carefully examined, and divided into relevant and non-  
24  
25 relevant studies (see Figure 1).  
26  
27  
28

29  
30 [insert Figure 1 here]  
31  
32

33  
34 The main qualifications that determined if studies were included in the relevant tables  
35  
36 were: (1) the population was in the young adult age range of 15–29 years, (2) the population had  
37  
38 a mental illness diagnosis, and (3) the study had a primary focus on attaining employment. If all  
39  
40 three of these criteria were addressed, the barriers and facilitators in the study were examined  
41  
42 and extracted. Country of origin and study format did not have any influence on determining  
43  
44 relevance to this scoping review.  
45  
46

47  
48 Of the 19 relevant articles, ten were from the United States, four were from Australia,  
49  
50 three from the United Kingdom, one from new Zealand, and one from the Netherlands. Results  
51  
52 showed that a concentration on employment for young adults with mental illness is occurring, for  
53  
54 the most part, in the western world, with the United States being the focal area of research. Of  
55  
56  
57  
58  
59  
60

1  
2  
3 the 19 articles, eight were published between 1999–2009, and eleven were published between  
4  
5 2010–2015. This increase shows that research into employment for young adults with mental  
6  
7 illness is a growing field. Although the search criteria allowed for articles published from 1985,  
8  
9 the researchers were unable to identify any relevant articles from 1985–1998.  
10  
11

12  
13 After a full text review, researchers collected and sorted the main components of articles  
14  
15 from the 19 relevant and the 14 non-relevant studies. We examined all non-relevant studies to  
16  
17 ensure there was an accurate adult literature comparison, which was necessary due to the lack of  
18  
19 literature related to young adults. See Table 2.  
20  
21

22  
23 [insert Table 2 here]  
24  
25

26 This scoping review identified several themes in regards to the barriers and facilitators to  
27  
28 employment for youth with mental illness. As shown in Figure 2, the four main themes extracted  
29  
30 from the literature were: (1) employment intervention in addition to treatment as usual, (2) age-  
31  
32 related components of employment, (3) a positive perception of self, and (4) continual support.  
33  
34

35  
36 [insert Figure 2 here]  
37  
38  
39  
40

### 41 **Employment intervention + mental health treatment as usual** 42 43

44 The scoping review found that having an employment intervention in addition to usual mental  
45  
46 health treatment led to higher success rates for young adults with mental illness<sup>37-39 44-47</sup> (as  
47  
48 identified in Table 1). For example, one youth-tailored employment intervention resulted in 65%  
49  
50 of the intervention group gaining employment, compared to only 9% of the control group.<sup>40</sup>  
51  
52 Another study found that youth-tailored employment support, when delivered concurrently with  
53  
54 conventional mental health therapies, led to improved health and employment outcomes.  
55  
56  
57  
58  
59  
60

1  
2  
3 Porteous and Waghorn<sup>41</sup> suggested that having both interventions in the same physical site  
4  
5 mutually reinforced these successes.  
6  
7

8 The scoping review also revealed the two central frameworks used when addressing  
9  
10 employment and youth with mental illness—specifically, the recovery-oriented framework and  
11  
12 the biomedical model. The biomedical model is defined as physical or biological aspects of  
13  
14 disease and illness. Success is achieved when there is an absence of the disease and/or disorder.<sup>48</sup>  
15  
16 In contrast, the recovery model focuses on “living a satisfying, hopeful, contributing life, despite  
17  
18 psychiatric disability or symptoms”. (p.168)<sup>49</sup> Our results suggest that the paradigm used to  
19  
20 guide intervention and care may shape how young adults gain and maintain employment. For  
21  
22 instance, one study in our review found that the biomedical model was a major barrier to finding  
23  
24 employment for this population, and the recovery-oriented framework led to higher rates  
25  
26 employment for young adults, based on its holistic perspective of physical, mental, social, and  
27  
28 spiritual health<sup>36 45 50</sup>  
29  
30  
31  
32  
33  
34  
35  
36

### 37 **Age-related components to employment**

38  
39 While the literature is still growing for this age population, the scoping review found many age-  
40  
41 related components that had an effect on young adults with mental illness finding employment.  
42  
43 Studies found that a younger age increased the participants’ access to programs, allowing them  
44  
45 to reap benefits and receive support for longer.<sup>36 37 39 41 44 47 51</sup> One study in our review also  
46  
47 suggested that early diagnosis of a mental illness may allow youth to receive treatment and  
48  
49 interventions in general, giving them more opportunities to learn to self-manage with their  
50  
51 condition.<sup>52</sup>  
52  
53  
54  
55  
56  
57  
58  
59  
60

1  
2  
3 One of the main differences for programs that support young adults in seeking  
4 employment was the focus on finding a job as opposed to seeking a long-term career. The goal of  
5 finding a career was described in the literature as not always applicable to this age group. Some  
6 finding a career was described in the literature as not always applicable to this age group. Some  
7 studies in the review highlighted that youth felt many existing programs were too focused on  
8 “getting a job” rather than supporting milestones along journey of employment and career  
9 construction. The results of this review yielded a concentration of studies focused on finding any  
10 kind of competitive employment and thereby helping a young adult achieve their goal of finding  
11 a first job.<sup>36 37 39 41 53</sup>

### 24 **Perception of self**

25  
26  
27 The studies in this review collectively identified that seeking employment can be a challenging  
28 endeavor, especially for young adults doing so for the first time. For better chances of success in  
29 finding employment, studies in the review suggested that harnessing feelings of hope and  
30 optimism about themselves and their career prospects is vital to employment success.<sup>36</sup> Some  
31 studies identified that young adults reported feeling more optimistic about jobs in which they can  
32 learn and progress, leading to greater senses of accomplishment and self-worth.<sup>36 53</sup> One  
33 participant in study #2 described the impact of employment on self-esteem as

34  
35  
36  
37  
38  
39  
40  
41  
42  
43  
44 *“a vicious circle, ‘cause you don’t have any work and you don’t bring in an income and*  
45 *it gives you no self-esteem, and then you don’t want to get up and go get a job”*<sup>27</sup> ( p. 68).

46  
47  
48  
49 Self-worth and self-esteem were identified throughout all studies as being important for this age  
50 group.  
51

1  
2  
3 Our review also found that programs that allowed participants to choose the jobs they  
4 pursue empowered these youth to take control of their career goals and aspirations for the future,  
5 in addition to finding employment.<sup>37 39</sup> The ability to choose was identified as a central asset for  
6 this age group: our review identified that, while many programs focus primarily on the retention  
7 of jobs, the young people themselves do not always share this priority. Giving young adults the  
8 right to both choose and leave jobs, allowing them to explore career opportunities, and pursuing  
9 opportunities to develop more skills were key facilitators to job and career development for this  
10 population.<sup>36 39</sup>

### 21 22 **Long Term Integrated Support**

23  
24  
25 Many of the studies identified in this systematic review did not continue to provide support for  
26 participants beyond the end of the job-seeking period. The duration of the support was identified  
27 as a major barrier. However, many of the studies reviewed lacked continued support beyond the  
28 end of the program. The short duration of support was identified as a major barrier for young  
29 adults with mental illness (ranging from 2-16 weeks). The scoping review showed that programs  
30 with short follow-up periods were more likely than programs with long follow-up periods to  
31 result in poor employment outcomes for youth.<sup>27 37 46</sup> (2007). Although the studies reviewed are  
32 relatively recent, the data supports the benefits of continued support to help youth with their  
33 employment goals.<sup>51</sup> For example, a number of studies<sup>37 39 54</sup> suggested that youth employment  
34 programs may work best when focusing on the continued success of retaining employment and  
35 career development in general. Of critical importance, most studies in this review suggested that  
36 ongoing support that integrates both health and employment or career development goals is a  
37 significant factor to ensuring that young adults with mental illness have the capacity to gain the  
38 skills necessary to manage long-term employment.<sup>27 31 36 41 44 50 51 55</sup>

## DISCUSSION

This review was conducted to describe the current literature related to the facilitators and barriers for young adults with mental illness who are seeking employment. A scoping review was chosen in order to determine the breadth of the literature for this topic. While there were no other systematic reviews or meta-analyses of the literature identified in this research area, this scoping review did identify a number of studies that investigated adults (age 29+) with mental illness who were seeking employment. These studies were excluded based on the allotted age range criteria. However, they nonetheless found similarities to the studies included as relevant in the scoping review.

This scoping review identified 19 relevant articles, of which there were a number of methodologies including randomized control trials (n=3), qualitative (n=3), naturalistic (n=2), longitudinal (n=2), pre-post design (n=3), descriptive (n=3), non-randomized control trial (n=1), cross-sectional interview (n=1), and prospective cohort (n=1) studies. When examining the studies found, the review was unable to find similarities in the methodology, type of intervention, or research question. This disparity suggests that the literature in this field of study is still developing, and alludes to the diverse approaches to the understanding the field. The articles were published between 1999–2015, with the majority (n=11) published between 2010–2015. The studies were predominantly completed in English-speaking countries (n=18) with a high volume from the United States (n=10), with others completed in Australia (n=4), New Zealand (n=1), and the United Kingdom (n=3). Common facilitators included high self-efficacy<sup>31</sup> early intervention,<sup>38 50</sup> participation in a supported employment program,<sup>31 36 40 41 44 50 56</sup> and a long-term follow-up after intervention.<sup>27 36</sup> Barriers included the use of exclusion criteria,<sup>36 44 50</sup> criminal justice involvement,<sup>39 44</sup> and lack of funding for programming.<sup>27 50</sup> The

1  
2  
3 four main themes extracted from the facilitators and barriers identified within the literature were  
4  
5 the:

- 6  
7 (1) need for employment intervention in addition to mental health treatment as usual,
- 8  
9 (2) unique age-related components associated with young adults,
- 10  
11 (3) impact of a young adult's perception of self, and
- 12  
13 (4) need for continual long-term support with training and career development.

14  
15 The key themes that this scoping review identified may add value to the way that  
16  
17 employment services are currently designed and implemented for the young adult population.  
18  
19 The transition from adolescence to adulthood is a typical process of development, but for many  
20  
21 young adults with mental health conditions, this transition can be especially difficult.<sup>51</sup> Young  
22  
23 adults are within an age range that has unique needs that are often different from those of older  
24  
25 adults. Creating a program designed specifically for this age group allows professionals to better  
26  
27 understand their needs, and provides opportunities to further young people's professional  
28  
29 development despite the barriers of mental illness. For the young adult population, retaining the  
30  
31 same job may not be indicative of a successful employment pattern; rather, our review suggests  
32  
33 that young people with mental illness may require the opportunity to explore various jobs in  
34  
35 order to expand their skill set. Our review suggests that young adults with mental health  
36  
37 conditions should be afforded the same opportunity as their peers by receiving tailored supported  
38  
39 employment programs designed to support their dynamic health and employment goals.<sup>36</sup> Most  
40  
41 studies in our review emphasized that long-term follow-up support is critical for this population  
42  
43 to help them to navigate the employment landscape. As youth acquire new jobs, they may also  
44  
45 benefit from continued support throughout these subsequent transitions to maximize their  
46  
47 success, self-esteem, and overall well-being.  
48  
49  
50  
51  
52  
53  
54  
55  
56  
57  
58  
59  
60

1  
2  
3 Our scoping review results support emerging literature that suggests that vocational  
4 interventions at the onset of illness can have both short-term and long-term effects, including the  
5 development of skills and interests, and a decrease in the likelihood of chronic unemployment  
6 which in turn can shape health outcomes.<sup>27 36-40 44 50 51 53 57 58</sup> Our review did highlight notable  
7 heterogeneity in the interventions delivered; however, one common theme was that supported  
8 employment intervention, when integrated with mental health treatment, may offer young adults  
9 an increased probability for employment success. More research is needed to outline evidence-  
10 based models of employment support for this group. Such information will be important when  
11 helping youth learn to self-manage their illness while achieving their employment goals.<sup>39</sup>

12  
13 Another area of future research is to understand the components of supported  
14 employment interventions that can produce meaningful outcomes for youth. Our review  
15 identified a lack of standardization for how these services have been developed and delivered.  
16 More work in close collaboration with youth and key stakeholders is needed (i.e., clinicians,  
17 family, funders) to tailor supported employment programs that can be scaled across mental  
18 health services and can be delivered early in the care pathway.<sup>59</sup> Given the increasing emphasis  
19 on patient-oriented research across developed countries,<sup>60-63</sup> there is an ideal opportunity for  
20 future research in this area to be conducted in partnership with relevant stakeholders, notably  
21 youth. By working with youth research partners to develop and test such interventions, mental  
22 health services have the opportunity to foster evidence-informed health care by bringing  
23 innovative rehabilitation approaches to the point of care for young adults with mental illness.

24  
25 While it is not the main tenet of a scoping review, it must be acknowledged that a  
26 thorough investigation into the quality of the literature was not completed. Despite the lack of  
27 analysis based on study rigor, our review did identify that many studies were descriptive in  
28  
29  
30  
31  
32  
33  
34  
35  
36  
37  
38  
39  
40  
41  
42  
43  
44  
45  
46  
47  
48  
49  
50  
51  
52  
53  
54  
55  
56  
57  
58  
59  
60



1  
2  
3 methodology and did not include control groups. As well, most studies had small sample sizes  
4  
5 and lacked consistent measurement of outcomes. In order to optimize decision-making, evidence  
6  
7 from well-designed studies is needed to develop health services, guidelines, and policies that  
8  
9 apply to this young adult population. Such clarity around employment and integrated approaches  
10  
11 to treatment may have significant potential to improve performance, accountability, and  
12  
13 innovation of youth mental health services worldwide.  
14  
15

16  
17 In conclusion, the health and wellbeing of young adults with mental illness is a topic of  
18  
19 global concern. Our review suggests that the employment goals of the young adult population are  
20  
21 important to them, and therefore should be recognized by the mental health system as an area to  
22  
23 address and improve upon. This paper presents preliminary evidence for the benefit of  
24  
25 integrating employment intervention and mental health services, specifically highlighting the  
26  
27 barriers and facilitators for this population to obtain employment. Collectively, the studies  
28  
29 included in the review emphasize that it cannot be assumed that young adults can be fit into an  
30  
31 adult model of care in relation to their employment and mental health needs; tailored programs  
32  
33 are required to address youth-specific needs. Aligning the mental health and employment  
34  
35 priorities of young adults may enable efficiency in achieving improved outcomes for this  
36  
37 population while promoting greater engagement of young adults in care and accountability of  
38  
39 mental health services worldwide.  
40  
41  
42  
43  
44  
45

#### 46 **Authors' contribution:**

- 48 • Taryn Gmitroski and Christl Bradley conducted the scoping review, extracted all the data,  
49 and contributed to preparation of the manuscript.
- 50 • Charlotte Beck developed the search strategy and contributed to writing the methods  
51 section of the manuscript.  
52 Lyn Heinemann, Grace Liu, and Steve Mathias provided content expertise to the design  
53 of protocol and review of the manuscript.
- 54 • Paige Blanchard provided expertise as a youth-peer partner in the study.  
55  
56  
57  
58  
59

- 1  
2  
3  
4  
5  
6  
7  
8  
9  
10  
11  
12  
13  
14  
15  
16  
17  
18  
19  
20  
21  
22  
23  
24  
25  
26  
27  
28  
29  
30  
31  
32  
33  
34  
35  
36  
37  
38  
39  
40  
41  
42  
43  
44  
45  
46  
47  
48  
49  
50  
51  
52  
53  
54  
55  
56  
57  
58  
59  
60
- Adelen Leon contributed to the study design, study process, and preparation and review of the manuscript.
  - Skye P. Barbic was the senior author of the manuscript, conceptualized the study, provided input to the research question and study design and analysis. Dr. Barbic oversaw all aspects of manuscript preparation.

For peer review only

1  
2  
3  
4  
5  
6  
7  
8  
9  
10  
11  
12  
13  
14  
15  
16  
17  
18  
19  
20  
21  
22  
23  
24  
25  
26  
27  
28  
29  
30  
31  
32  
33  
34  
35  
36  
37  
38  
39  
40  
41  
42  
43  
44  
45  
46  
47  
48  
49  
50  
51  
52  
53  
54  
55  
56  
57  
58  
59  
60

Tables

For peer review only

Table 1. Summary of studies included in the review

| Study Information                                                             | Country of Study | Population                                                                                                 | Type of Study and Intervention (If applicable)                                                                                                                                                                                   | Summary of Results                                                                                                                                                                                                                                                                                                                                                                                                                                                                                                                                                                                                                                | Facilitators to Employment                                                                                                                                                                                                                        | Barriers to Employment                                                                                                                                           | Study Limitations                                                                              |
|-------------------------------------------------------------------------------|------------------|------------------------------------------------------------------------------------------------------------|----------------------------------------------------------------------------------------------------------------------------------------------------------------------------------------------------------------------------------|---------------------------------------------------------------------------------------------------------------------------------------------------------------------------------------------------------------------------------------------------------------------------------------------------------------------------------------------------------------------------------------------------------------------------------------------------------------------------------------------------------------------------------------------------------------------------------------------------------------------------------------------------|---------------------------------------------------------------------------------------------------------------------------------------------------------------------------------------------------------------------------------------------------|------------------------------------------------------------------------------------------------------------------------------------------------------------------|------------------------------------------------------------------------------------------------|
| Baksheev<br>Allot<br>Jackson<br>McGorry<br>Killackey<br><br><b>Date:</b> 2012 | Australia        | <b>Age:</b> 15-24<br>Mean age:<br>21.4 years<br><br><b>N:</b> 41<br><br><b>Dx:</b> First episode psychosis | Randomized control study.<br><br>Intervention:<br>Compared Individual placement and support (IPS) plus treatment, with just treatment on its own.<br><br>There was a 6-month intervention period and a 6-month follow-up period. | Intervention group were 14.17 times more likely to have worked or studied during the 6-month <i>assessment</i> period compared to the control group.<br><br>Intervention group were 16.26 times more likely to obtain work or study during the 6-month <i>follow up</i> period<br><br>Baseline factors that were found to be <i>not significant</i> in determining if a participant would have found work or studied in the 6-month follow up period included:<br>- gender<br>- being occupied at baseline<br>- whether participants were receiving government benefits<br>- educated beyond secondary level<br>- duration of untreated psychosis | The main facilitator to employment was having participated in the IPS program and not only the intervention as usual.<br><br>Clinicians should not exclude any client based on 'work readiness', current symptoms, or any other personal factors. | No barriers to employment were identified in this paper.                                                                                                         | Short follow up (6 months)<br>Small sample size                                                |
| J. Bassett<br>Lloyd<br>H. Bassett<br><br><b>Date:</b> 2001                    | Australia        | <b>Age:</b> 18-28<br><br><b>N:</b> 10<br><br><b>Dx:</b> Psychotic disorder                                 | Qualitative Study<br>Intervention: Focus groups on participants' perceived barriers to employment                                                                                                                                | Themes of focus groups:<br>- Loss<br>-Stigma<br>-Treatment issues<br>-Symptom management<br>-Life goals<br>-Need for support                                                                                                                                                                                                                                                                                                                                                                                                                                                                                                                      | Programs aimed to assist in the development of time management, stress management, self-confidence, and problem-solving skills                                                                                                                    | Low self-esteem<br><br>Low self- worth<br>Negative effects of medication (low motivation & tiredness)<br><br>Lack of strategies to manage conflict / frustration | Small sample size<br>Only male participants<br>Participants were only from one health district |

|                                                              |     |                                                                                                                                                                  |                                                                                                                                                                                                                                                                                                                            |                                                                                                                                                                                                                                                                                                                                       |                                                                                                                                                                                                                                                                                 |                                                  |                                                                                                                             |
|--------------------------------------------------------------|-----|------------------------------------------------------------------------------------------------------------------------------------------------------------------|----------------------------------------------------------------------------------------------------------------------------------------------------------------------------------------------------------------------------------------------------------------------------------------------------------------------------|---------------------------------------------------------------------------------------------------------------------------------------------------------------------------------------------------------------------------------------------------------------------------------------------------------------------------------------|---------------------------------------------------------------------------------------------------------------------------------------------------------------------------------------------------------------------------------------------------------------------------------|--------------------------------------------------|-----------------------------------------------------------------------------------------------------------------------------|
|                                                              |     |                                                                                                                                                                  |                                                                                                                                                                                                                                                                                                                            |                                                                                                                                                                                                                                                                                                                                       | Skills at how to manage the lifestyle change from not working to being employed                                                                                                                                                                                                 |                                                  |                                                                                                                             |
| Burke-Miller et al.<br><br><b>Date:</b> 2012                 | USA | <b>Age:</b> 18-30<br>*divided into 3 groups: youth (18-24), young adults (25-30), older adult (31+)<br><br><b>N=</b> 1272<br><br><b>Dx:</b> Any mental health dx | Multi-site randomized control trial<br><br>Examined if participants had any kind of work, and if they were employed in a competitive job*<br><br>*Definition of competitive job: pays minimum wage or higher, located in a mainstream/integrated setting, is not set aside for mental health consumers, is consumer owned. | Youth (after intervention):<br>- any work: 69%<br>Competitive employment: 50%<br>- vocational hours received: 53<br><br>Young adults<br>- any work 73%<br>- competitive employment: 56%<br>- vocational hours received: 56<br><br>Older adult:<br>- any work: 58%<br>- competitive employment: 42%<br>- vocational hours received: 60 | High future work expectations<br><br>Greater hours of supported employment services<br>- work history<br><br>Positive work history (better able to provide references)<br><br>Recovery focused<br><br>Younger age<br><br>Increased access to benefits counselling (for welfare) | Heavy emphasis on job retention for youth        | Small sample size in the 'youth' category                                                                                   |
| Dudley Nicholson<br>Stott<br>Spoors<br><br><b>Date:</b> 2014 | USA | <b>Age:</b> 14-35<br><br><b>N:</b> 30<br><br><b>Dx:</b> Psychosis                                                                                                | Naturalistic comparison of 2 studies<br><br>Intervention: Individual Placement Support (IPS) model + vocational worker                                                                                                                                                                                                     | Improve the engagement in meaningful education, training or employment for young people with psychosis                                                                                                                                                                                                                                | IPS<br><br>Younger age<br><br>Small caseload size for vocational therapist<br><br>Funding for vocational specialist                                                                                                                                                             | Psychiatric illness<br>Lack of follow-up support | The findings rest on the assumption that the only difference between the services was the presence of the vocational worker |

|                                                |     |                                                                                             |                                                                                                                                                                                       |                                                                                                                                                                                                                                                                                                                |                                                                                                                                                                                                                                                                                                                                                                     |                                  |                                                                                                                   |
|------------------------------------------------|-----|---------------------------------------------------------------------------------------------|---------------------------------------------------------------------------------------------------------------------------------------------------------------------------------------|----------------------------------------------------------------------------------------------------------------------------------------------------------------------------------------------------------------------------------------------------------------------------------------------------------------|---------------------------------------------------------------------------------------------------------------------------------------------------------------------------------------------------------------------------------------------------------------------------------------------------------------------------------------------------------------------|----------------------------------|-------------------------------------------------------------------------------------------------------------------|
|                                                |     |                                                                                             |                                                                                                                                                                                       |                                                                                                                                                                                                                                                                                                                | <p>Zero exclusion policy for clients</p> <p>Diversity of jobs developed</p> <p>Jobs as transitions (positive experiences on the path of vocational growth and development)</p> <p>Follow-along supports (provided to employer and client on a time-unlimited basis)</p> <p>Rapid job searches (within 4 weeks)</p> <p>Ongoing work-based vocational assessments</p> |                                  |                                                                                                                   |
| <p>Ellison et al.</p> <p><b>Date:</b> 1999</p> | USA | <p><b>Age:</b> 18-35</p> <p><b>N</b> = 36</p> <p><b>Dx:</b> Any mental health diagnosis</p> | <p>Longitudinal study comparing original intervention group and the same participants at 5 years' follow-up</p> <p>*follow-up from Danley, Sciarappa &amp; MacDonald-Wilson, 1992</p> | <p>Data from 2 groups (original career education group, and follow-up group) were examined</p> <p>The main significant differences were found between baseline (prior to original intervention) results and the follow-up five years later.</p> <p>Near significant decrease in proportion of participants</p> | <p>Higher work satisfaction</p>                                                                                                                                                                                                                                                                                                                                     | <p>Decreased quality of life</p> | <p>No control group</p> <p>Not all original participants were located, therefore their data were not included</p> |

1  
2  
3  
4  
5  
6  
7  
8  
9  
10  
11  
12  
13  
14  
15  
16  
17  
18  
19  
20  
21  
22  
23  
24  
25  
26  
27  
28  
29  
30  
31  
32  
33  
34  
35  
36  
37  
38  
39  
40  
41  
42  
43  
44  
45  
46  
47

|                                             |     |                                                                                                                         |                                                                                                                                                                                       |                                                                                                                                                                                                                                                                                                           |                                                                                                                                                                                                          |                                                                                                                                                                             |                                                                                                        |
|---------------------------------------------|-----|-------------------------------------------------------------------------------------------------------------------------|---------------------------------------------------------------------------------------------------------------------------------------------------------------------------------------|-----------------------------------------------------------------------------------------------------------------------------------------------------------------------------------------------------------------------------------------------------------------------------------------------------------|----------------------------------------------------------------------------------------------------------------------------------------------------------------------------------------------------------|-----------------------------------------------------------------------------------------------------------------------------------------------------------------------------|--------------------------------------------------------------------------------------------------------|
|                                             |     |                                                                                                                         |                                                                                                                                                                                       | currently in school or a training program<br><br>Findings indicate that positive results seen at the end of the original intervention period were maintained for the 5 years since that time.                                                                                                             |                                                                                                                                                                                                          |                                                                                                                                                                             |                                                                                                        |
| Ferguson<br><br><b>Date:</b> 2013           | USA | <b>Age:</b> 18-24<br>Mean age: 21<br><br><b>N:</b> 28<br><br><b>Dx:</b> Homeless youth with any mental health diagnosis | Randomized Control Trial (RCT)<br><br>Intervention: Supported employment with 4 components:<br>1)Vocational skills<br>2)Small business skills<br>3)Social skills<br>Clinical services | The study described a methodology for establishing a university-agency research partnership to design, implement, evaluate, and replicate evidence-informed and evidence-based interventions with homeless youth with mental illness to enhance their employment, mental health, and functional outcomes. | Vocational + clinical service integration<br><br>Structuring participant time<br><br>Social contact<br><br>Social identity<br><br>Zero exclusion from program<br><br>Rapid job search<br><br>Younger age | No barriers addressed in study                                                                                                                                              | Majority of participants were male<br><br>Small sample size                                            |
| Ferguson Kie Glynn<br><br><b>Date:</b> 2012 | USA | <b>Age:</b> 18-24<br><br><b>N:</b> 20<br><br><b>Dx:</b> Homeless youth with any mental health diagnosis                 | Pre-Post Quasi-experiment<br><br>Intervention: Adapted IPS model targeted at low-income youth                                                                                         | The study sought to adapt an evidence-based intervention for homeless young adults with mental illness.<br><br>At follow-up, the IPS group were 7.83 times more likely of working than the control group<br>The IPS group worked 5.20 months compared to the control group at 2.19 months                 | IPS intervention<br><br>Less “severe” mental health dx<br><br>Younger age                                                                                                                                | Living on the streets<br><br>Criminal activity<br><br>Drug use<br><br>The need to maintain personal hygiene<br><br>Securing transportation<br><br>Having enough food to eat | Majority of the participants were male<br><br>Small sample size<br><br>Non-random assignment to groups |

|                                                                                               |           |                                                                                              |                                                                                                               |                                                                                                                                                                                                                                                                  |                                                                                                                                               |                                                                                                                                                                                                                             |                                                                                                                                                         |
|-----------------------------------------------------------------------------------------------|-----------|----------------------------------------------------------------------------------------------|---------------------------------------------------------------------------------------------------------------|------------------------------------------------------------------------------------------------------------------------------------------------------------------------------------------------------------------------------------------------------------------|-----------------------------------------------------------------------------------------------------------------------------------------------|-----------------------------------------------------------------------------------------------------------------------------------------------------------------------------------------------------------------------------|---------------------------------------------------------------------------------------------------------------------------------------------------------|
| <p>Gilmer<br/>Ojeda<br/>Leich<br/>Heller<br/>Garcia<br/>Palinkas</p> <p><b>Date:</b> 2012</p> | USA       | <p><b>Age:</b> 18-24</p> <p><b>N:</b> 74</p> <p><b>Dx:</b> Any mental health diagnosis</p>   | <p>Qualitative Study</p> <p>Intervention:<br/>Integrating employment services into mental health services</p> | <p>The study assessed the needs for mental health services for transition-age youths at youth-specific programs</p>                                                                                                                                              | <p>Services that foster a transition to independence</p> <p>Age-specific housing</p>                                                          | <p>Inconvenient scheduling</p> <p>Weak patient - provider relationship</p> <p>Limited program funding</p> <p>Lack of mentorship from peers experiencing similar struggles</p> <p>Need for holistic approach to recovery</p> | <p>Sampling bias of transition-aged youth</p>                                                                                                           |
| <p>Haber,<br/>Karpur,<br/>Deschens<br/>Clark</p> <p><b>Date:</b> 2008</p>                     | USA       | <p><b>Mean age:</b> 17</p> <p><b>N=</b> 562</p> <p><b>Dx:</b> Any mental health dx</p>       | <p>Descriptive</p>                                                                                            | <p>The most consistent improvement was shown on the indicators of educational advancement and employment progress</p> <p>There was a post hoc improvement on employment/educational advancement</p> <p>Productivity, education, and employment all increased</p> | <p>Education for younger participants</p> <p>Longer period of support for employment and education related goals for younger participants</p> | <p>Advanced age (within the youth population)</p>                                                                                                                                                                           | <p>Lack of uniform data across sites on program characteristics</p> <p>Lack of control group</p>                                                        |
| <p>Killackey,<br/>Jackson,<br/>McGorry</p> <p><b>Date:</b> 2008</p>                           | Australia | <p><b>Age range:</b> 15-25</p> <p><b>N=</b> 41</p> <p><b>Dx:</b> first episode psychosis</p> | <p>Non-randomized control trial</p> <p>IPS + treatment as usual</p>                                           | <p>65% of intervention group found employment compared with 9% of control group</p> <p>The intervention group was able to find more jobs (23 compared to the control group's 3)</p> <p>80% of the intervention group listed welfare benefits as their</p>        | <p>Participation in a vocational intervention for young people</p> <p>Acquiring jobs in a wide range of occupations that are congruent</p>    | <p>Little or no work history can be a barrier to longer term employment</p>                                                                                                                                                 | <p>Small sample size</p> <p>No follow up to determine whether a short 6-month intervention is sufficient to lead to lasting gains in employment and</p> |



|                                                        |             |                                                                                                                           |                                                                                                                                          | primary source of income                                                                                                                                                                                                | with personal interests and needs                                                                                                                                                             |                                                                                                                                                             | employment skills                                                                                                                                                                                         |
|--------------------------------------------------------|-------------|---------------------------------------------------------------------------------------------------------------------------|------------------------------------------------------------------------------------------------------------------------------------------|-------------------------------------------------------------------------------------------------------------------------------------------------------------------------------------------------------------------------|-----------------------------------------------------------------------------------------------------------------------------------------------------------------------------------------------|-------------------------------------------------------------------------------------------------------------------------------------------------------------|-----------------------------------------------------------------------------------------------------------------------------------------------------------------------------------------------------------|
| <p>Luciano Carpenter-Song</p> <p><b>Date:</b> 2014</p> | USA         | <p><b>Age:</b> 22-32</p> <p><b>N:</b> 12</p> <p><b>Dx:</b> Psychosis<br/>Substance use disorder</p>                       | <p>Cross-Sectional interview study</p> <p>Intervention:<br/>Explored past / current participation experiences with school &amp; work</p> | <p>This study examines the meaning and importance of career exploration and career development in the context of integrated treatment for young adults with early psychosis and substance use disorders.</p>            | <p>Prioritizing career oriented opportunities (not finding 'just a job')</p> <p>Optimism in developing a career</p> <p>External support</p> <p>Prioritizing career-oriented opportunities</p> | <p>Family pushing for participants to obtain low wage / low skill jobs</p> <p>Placement in job with no potential to advance</p> <p>Decreased confidence</p> | <p>Data was cross-sectional, precluding causal interpretation</p> <p>Study did not include:</p> <ul style="list-style-type: none"> <li>· Women</li> <li>· People with low socioeconomic status</li> </ul> |
| <p>Nochajski Schweitzer</p> <p><b>Date:</b> 2014</p>   | USA         | <p><b>Age:</b> 14-19</p> <p><b>N:</b> 47</p> <p><b>Dx:</b> Emotional + Behavioural disorders</p>                          | <p>Qualitative</p> <p>Intervention: School-to-work transition program (STWTP) focusing on additional supports needed for youth</p>       | <p>This study examines the transition of students with disabilities from high school to adult occupations, such as work and independent living. 30% of youth were still employed after the 10-week follow-up period</p> | <p>Transition program starting in the beginning of high school</p> <p>Pay youth to participate in specific program</p>                                                                        | <p>Unemployment of parents</p> <p>Family living in poverty</p> <p>Substance use within family</p> <p>Incarceration of prominent family member</p>           | <p>Only one diagnosis involved in study</p> <p>Only youth enrolled in high school examined</p> <p>Short follow-up period</p>                                                                              |
| <p>Porteous, Waghorn</p> <p><b>Date:</b> 2009</p>      | New Zealand | <p><b>Age:</b> 14-26</p> <p><b>N=</b> 135</p> <p><b>Dx:</b> first episode psychosis (schizophrenia, major depression,</p> | <p>Implementation of fidelity scale to determine effectiveness of supported employment services for young adults</p>                     | <p>Occupational therapists and other allied health professionals can help facilitate system change towards the routine delivery of employment services integrated with public mental health treatment and care</p>      | <p>Co-location of employment services and publicly funded mental health services</p> <p>Employment was identified as an unmet</p>                                                             | <p>Youth not being on the caseload for a mental health team</p>                                                                                             | <p>Exploratory and anecdotal nature of study</p>                                                                                                                                                          |

|                                                                       |    |                                                                                                   |                                                                                                                      |                                                                                                                                                                                                                                                   |                                                                                                                                                                                              |                                                                                              |                                                                                                     |
|-----------------------------------------------------------------------|----|---------------------------------------------------------------------------------------------------|----------------------------------------------------------------------------------------------------------------------|---------------------------------------------------------------------------------------------------------------------------------------------------------------------------------------------------------------------------------------------------|----------------------------------------------------------------------------------------------------------------------------------------------------------------------------------------------|----------------------------------------------------------------------------------------------|-----------------------------------------------------------------------------------------------------|
|                                                                       |    | bipolar affective disorder)                                                                       |                                                                                                                      |                                                                                                                                                                                                                                                   | occupational need                                                                                                                                                                            |                                                                                              |                                                                                                     |
|                                                                       |    |                                                                                                   |                                                                                                                      |                                                                                                                                                                                                                                                   | Established in the early intervention team                                                                                                                                                   |                                                                                              |                                                                                                     |
| Rinaldi McNeil<br>Firm Koletsi Perkins Singh<br><br><b>Date:</b> 2004 | UK | <b>Age:</b> 18-32<br>Median age: 21<br><br><b>N=</b> 40<br><br><b>Dx:</b> First episode psychosis | Pre-post study<br><br>Compared baseline to 6-month follow-up and 12 month follow-up                                  | Employment:<br><b>Baseline:</b> 10% were employed, 55% were unemployed.<br><b>6 months:</b> 28% employed, 7% unemployed.<br><b>12 month:</b> 41% employed, 5% unemployed.<br>Everyone employed at 6 months, continued to be employed at 12 months | Participation in vocational intervention program<br><br>Team-based approach to recovery & employment<br><br>Proactively help participants retain and keep jobs<br><br>Welfare benefit advice | Not addressed in article                                                                     | Only diagnosis was psychosis<br><br>Small sample size<br><br>Lack of comparison group               |
| Rinaldi Perkins McNeil Hickman Singh<br><br><b>Date:</b> 2010         | UK | <b>Age:</b> 17-32<br><br><b>N=</b> 166<br><br><b>Dx:</b> Schizophrenia                            | Pre/post design naturalistic evaluation<br><br>Supported education was delivered                                     | 40% of participants were working/studying at start of intervention, this increased to 71% by 6 months<br><br>47% of those who were unemployed at baseline, achieved open employment by 24 months follow up                                        | Transition from education/training to the labour market is critical for independence<br><br>Short work history is acceptable<br><br>Use of a 'place and train' method                        | Not addressed in article                                                                     | No control group<br><br>Quality of life was not explored                                            |
| Tapfumaneyi et al.<br><br><b>Date:</b> 2015                           | UK | <b>Age:</b> 14-35<br><br><b>N=</b> 1067<br><br><b>Dx:</b> Any mental health dx                    | Naturalistic study Intervention<br><br>Multidisciplinary service that focused on recovery and relapse prevention for | After 1 year 34.1% had been employed or studied towards a qualification<br><br>61.2% were in employment<br><br>50.4% were in educational                                                                                                          | Reduction in duration of untreated psychosis<br><br>Engagement in early intervention                                                                                                         | Welfare benefits (relatively high reward for being unemployed)<br><br>Stigma, discrimination | Differences in outcomes between teams was not analyzed<br><br>The study was not able to control for |

|                                                                                 |         |                                                                                                                                             |                                                                                                                                               |                                                                                                                                                                                                                                              |                                                                                                                                   |                                                                                                                                                                                      |                                                                                                                                                                                                                                                                                          |
|---------------------------------------------------------------------------------|---------|---------------------------------------------------------------------------------------------------------------------------------------------|-----------------------------------------------------------------------------------------------------------------------------------------------|----------------------------------------------------------------------------------------------------------------------------------------------------------------------------------------------------------------------------------------------|-----------------------------------------------------------------------------------------------------------------------------------|--------------------------------------------------------------------------------------------------------------------------------------------------------------------------------------|------------------------------------------------------------------------------------------------------------------------------------------------------------------------------------------------------------------------------------------------------------------------------------------|
|                                                                                 |         |                                                                                                                                             | 2-3 years                                                                                                                                     | courses<br>employment/education at<br>baseline                                                                                                                                                                                               | services for more<br>than 1 year<br>(compared to<br>those engaged for<br>less than 1 year)<br><br>Involvement in<br>the IPS model | Lack of professional<br>help<br><br>Illness related<br>factors                                                                                                                       | premorbid<br>functioning                                                                                                                                                                                                                                                                 |
| Vander<br>Stoep et al.<br><br><b>Date:</b> 2000                                 | USA     | <b>Age:</b> 18-21<br>years<br><br><b>N=</b> 181<br><br><b>Dx:</b> Anxiety<br>disorder,<br>depressive<br>disorder,<br>disruptive<br>disorder | Longitudinal study<br><br>Compares 33<br>participants with<br>psychiatric disorder<br>and 148 participants<br>without psychiatric<br>disorder | 39.4% of participants with<br>psychiatric disorder had not<br>completed secondary school (6<br>times less likely than other<br>youths to accomplish this task)<br><br>4.07 times less likely to be<br>employed or in college/trade<br>school | No diagnosis of<br>psychiatric<br>condition                                                                                       | Diagnosis of a<br>psychiatric<br>condition                                                                                                                                           | Examined multiple<br>areas of life:<br>gainful<br>employment,<br>criminal<br>involvement,<br>sexual activity,<br>and secondary<br>school completion.<br><br>Small numbers<br>hampered the<br>ability to draw<br>firm conclusions<br>about the<br>magnitude of the<br>effects of exposure |
| Veldman<br>Reijneveld<br>Ortiz<br>Verhulst<br>Bultmann<br><br><b>Date:</b> 2015 | Holland | <b>Age:</b> 11-19<br><br><b>N:</b> 1711<br><br><b>Dx:</b> Any<br>mental health<br>dx                                                        | Prospective cohort<br>study<br><br>Intervention:<br>Tracking<br>Adolescents'<br>Individual Lives<br>Survey (TRAILS)                           | Examines the etiology and<br>course of psychopathology<br>Study found that Mental health<br>dx affect education and<br>employment in negative ways                                                                                           | Being diagnosed<br>with a mental<br>illness later in life                                                                         | Mental health<br>diagnosis indicated<br>as a high-stable<br>trajectory, meaning<br>they had serious<br>mental illness at a<br>younger age<br>compared to others<br>in the population | Measuring the<br>outcome at the<br>same time point as<br>the end of the<br>trajectory,<br>allowing reverse<br>causation<br><br>Limited number of<br>young adults at<br>work without basic<br>education level<br>and in neither<br>education nor                                          |

|                                                                                  |                  |                                                                                                                                                   |                                                                        |                                                                                                                                                                                 |                                                                                                                                        |                                                                                                                                                                                                                                                                                                                                                                                                                                                                                |                                                      |
|----------------------------------------------------------------------------------|------------------|---------------------------------------------------------------------------------------------------------------------------------------------------|------------------------------------------------------------------------|---------------------------------------------------------------------------------------------------------------------------------------------------------------------------------|----------------------------------------------------------------------------------------------------------------------------------------|--------------------------------------------------------------------------------------------------------------------------------------------------------------------------------------------------------------------------------------------------------------------------------------------------------------------------------------------------------------------------------------------------------------------------------------------------------------------------------|------------------------------------------------------|
| <p>Waghorn<br/>Collister<br/>Killackey<br/>Sherring</p> <p><b>Date:</b> 2007</p> | <p>Australia</p> | <p><b>Age:</b> 15-25</p> <p><b>N:</b> 7</p> <p><b>Dx:</b><br/>Any mental health diagnosis<br/>Socially &amp; economically marginalized people</p> | <p>Descriptive study</p> <p>Intervention:<br/>Supported Employment</p> | <p>The study sought to determine what the major and minor <u>barriers</u> were when integrating supported employment services into already existing mental health services.</p> | <p>Setting clear goals throughout treatment</p> <p>Establishing sustainable partnerships between the health and employment sectors</p> | <p>Time it takes to integrate vocational staff into mental health team</p> <p>Lack of resources/ funding for programming</p> <p>Differences in organizational cultures</p> <p>Legal, insurance, and confidentiality issues</p> <p>Large caseload size for employment specialists</p> <p>Limited follow-up support</p> <p>Having to participate in a program while not working / being paid</p> <p>Additional training to vocational staff from a mental health perspective</p> | <p>training</p> <p>No clear number of population</p> |
|----------------------------------------------------------------------------------|------------------|---------------------------------------------------------------------------------------------------------------------------------------------------|------------------------------------------------------------------------|---------------------------------------------------------------------------------------------------------------------------------------------------------------------------------|----------------------------------------------------------------------------------------------------------------------------------------|--------------------------------------------------------------------------------------------------------------------------------------------------------------------------------------------------------------------------------------------------------------------------------------------------------------------------------------------------------------------------------------------------------------------------------------------------------------------------------|------------------------------------------------------|

1  
2  
3  
4  
5  
6  
7  
8  
9  
10  
11  
12  
13  
14  
15  
16  
17  
18  
19  
20  
21  
22  
23  
24  
25  
26  
27  
28  
29  
30  
31  
32  
33  
34  
35  
36  
37  
38  
39  
40  
41  
42  
43  
44  
45  
46  
47

Table 2. Summary of excluded studies in the review where content was considered

| Study Information                                               | Country of Study | Population                                                                                                                                                 | Type of Study and Intervention (If applicable)              | Summary of Results                                                                                            | Facilitators to Employment                                                                                                                                 | Barriers to Employment                                                                        | Study Limitations / Exclusion Factors (If applicable)                                                   |
|-----------------------------------------------------------------|------------------|------------------------------------------------------------------------------------------------------------------------------------------------------------|-------------------------------------------------------------|---------------------------------------------------------------------------------------------------------------|------------------------------------------------------------------------------------------------------------------------------------------------------------|-----------------------------------------------------------------------------------------------|---------------------------------------------------------------------------------------------------------|
| 1 Achterberg<br>Wind de Boer<br>Frings-Dresen<br><br>Date: 2009 | Netherlands      | <b>Age:</b> 18 and younger<br><br><b>N:</b> 12,484<br><br><b>Dx:</b> Cancer, transplants, Kidney disease, Arthritis Chronic diseases Physical disabilities | Systematic Review                                           | To study factors that promoted or hindered disabled people to work                                            | Male sex<br><br>High school education level or higher<br><br>Low depression scores<br><br>High psychosocial functioning<br><br>High dispositional optimism | Not applicable to article                                                                     | Population not relevant                                                                                 |
| 2 Bond<br>Becker Drake<br>Rapp Meisler<br>Lehman Bell<br>Blyer  | USA              | <b>Age:</b> Adult – not specified<br><br><b>N:</b> 11 studies reviewed<br><br><b>Dx:</b> Any                                                               | Systematic Review<br><br>Intervention: Supported employment | A systematic review examining the facilitators and barriers to mentally ill persons finding employment from a | Work history<br><br>Supported employment program is close integrated within the mental health team                                                         | Access to supported employment<br><br>Government barriers – lack of funding<br><br>Clinicians | Although a work history predicts better employment outcomes in supported employment programs, supported |

|                                              |            |                                                                                                                   |                                                    |                                                                                                                                                   |                                                                                                                                                                                                                                         |                                                                                                                                                                                                      |                                                                                                                                  |
|----------------------------------------------|------------|-------------------------------------------------------------------------------------------------------------------|----------------------------------------------------|---------------------------------------------------------------------------------------------------------------------------------------------------|-----------------------------------------------------------------------------------------------------------------------------------------------------------------------------------------------------------------------------------------|------------------------------------------------------------------------------------------------------------------------------------------------------------------------------------------------------|----------------------------------------------------------------------------------------------------------------------------------|
| <p><b>Date:</b> 2001</p>                     |            | <p>mental health dx</p>                                                                                           |                                                    | <p>systematic and individual level</p>                                                                                                            | <p>Follow-along supports are maintained indefinitely</p> <p>Government – Clear outcome priorities</p> <p>Making a total commitment to competitive employment without diluting focus and resources to traditional forms of voc rehab</p> | <p>view clients as un-motivated to work</p> <p>Resistance to change within an organization</p> <p>Inadequate resources</p> <p>Clients not having accurate information about supported employment</p> | <p>employment remains more effective than traditional vocational services for clients with both good and poor work histories</p> |
| <p>3 Bond Drake</p> <p><b>Date:</b> 2008</p> | <p>USA</p> | <p><b>Age:</b> Adults- not specified</p> <p><b>N:</b> All papers published in 2007/2008</p> <p><b>Dx:</b> Any</p> | <p>Systematic Review</p> <p>Interventions: IPS</p> | <p>The conclusion of the systematic review revealed that IPS models will not result in employment unless more critical barriers are addressed</p> | <p>Younger age</p> <p>Providing client perceived need supports</p> <p>Help youth obtain long-lasting, satisfying, and</p>                                                                                                               | <p>Unequal access to supported employment across populations</p> <p>Negative societal influences</p>                                                                                                 | <p>Based on adults with mental illness, not youth</p>                                                                            |

1  
2  
3  
4  
5  
6  
7  
8  
9  
10  
11  
12  
13  
14  
15  
16  
17  
18  
19  
20  
21  
22  
23  
24  
25  
26  
27  
28  
29  
30  
31  
32  
33  
34  
35  
36  
37  
38  
39  
40  
41  
42  
43  
44  
45  
46  
47

|                                                                      |     | mental illness dx                                                                       |                           |                                                                                                                                                                                                                                                                                                                           | meaningful careers – not just a job | Increasing unemployment rate for the general population |                                              |
|----------------------------------------------------------------------|-----|-----------------------------------------------------------------------------------------|---------------------------|---------------------------------------------------------------------------------------------------------------------------------------------------------------------------------------------------------------------------------------------------------------------------------------------------------------------------|-------------------------------------|---------------------------------------------------------|----------------------------------------------|
| 4<br>Crowther<br>Marshall<br>Bond<br>Huxley<br><br><b>Date: 2010</b> | USA | <b>Age:</b> 18-65<br><br><b>N:</b> 18 RCT<br><br><b>Dx:</b> Any mental health diagnosis | Cochrane Review of 18 RCT | Primary outcome:<br>Number of clients in competitive employment at various time points<br><br>Findings suggest that supported employment is more effective than pre-vocational training when helping mentally ill people obtain competitive employment<br><br>5 randomized trails (n=484 showed that clients in supported | Not Applicable                      | Not Applicable                                          | Age range was not within the scope of review |

|                                                |     |                                                                                                            |                                                                                                                                                                         |                                                                                                                                                                                                                            |                                                                                                                                                                                                                         |                                    |                                                                               |
|------------------------------------------------|-----|------------------------------------------------------------------------------------------------------------|-------------------------------------------------------------------------------------------------------------------------------------------------------------------------|----------------------------------------------------------------------------------------------------------------------------------------------------------------------------------------------------------------------------|-------------------------------------------------------------------------------------------------------------------------------------------------------------------------------------------------------------------------|------------------------------------|-------------------------------------------------------------------------------|
|                                                |     |                                                                                                            |                                                                                                                                                                         | employment were significantly more likely to be in competitive employment at six time points across 18 months                                                                                                              |                                                                                                                                                                                                                         |                                    |                                                                               |
| 5<br>Elliott<br>Konet<br><br><b>Date:</b> 2014 | USA | <b>Age:</b> 19-62<br>Mean age: 36<br><br><b>N:</b> 54<br><br><b>Dx:</b><br>Borderline personality disorder | <b>Descriptive</b><br><br><b>Intervention:</b><br>Implementation of a job preparedness program (The Connections Place) to connect treatment and employment more fluidly | Of the 54 clients, 48% (26) obtained full-time employment, 22% (12) significantly improved their job preparedness, 26% (14) made limited progress toward job preparedness, and 4% (2) made no progress in job preparedness | Meaningful friendships / partnership<br><br>Vocational skills<br><br>Focus on learning more about interests and aptitudes vs. just getting a job for an income<br><br>Attend the program in a real work-like environmen | Emotional barriers (not specified) | Lack of pre and post evaluations of clients<br><br>Absence of a control group |

1  
2  
3  
4  
5  
6  
7  
8  
9  
10  
11  
12  
13  
14  
15  
16  
17  
18  
19  
20  
21  
22  
23  
24  
25  
26  
27  
28  
29  
30  
31  
32  
33  
34  
35  
36  
37  
38  
39  
40  
41  
42  
43  
44  
45  
46  
47



1  
2  
3  
4  
5  
6  
7  
8  
9  
10  
11  
12  
13  
14  
15  
16  
17  
18  
19  
20  
21  
22  
23  
24  
25  
26  
27  
28  
29  
30  
31  
32  
33  
34  
35  
36  
37  
38  
39  
40  
41  
42  
43  
44  
45  
46  
47

|                                                                          |                    |                                                                                       |                                                      |                                                                                                                                                                                                                                                                                                                                                                                                                                 |                                  |                                                                                                                                                                                                                                                                                                |                                                                                                                              |
|--------------------------------------------------------------------------|--------------------|---------------------------------------------------------------------------------------|------------------------------------------------------|---------------------------------------------------------------------------------------------------------------------------------------------------------------------------------------------------------------------------------------------------------------------------------------------------------------------------------------------------------------------------------------------------------------------------------|----------------------------------|------------------------------------------------------------------------------------------------------------------------------------------------------------------------------------------------------------------------------------------------------------------------------------------------|------------------------------------------------------------------------------------------------------------------------------|
| <p>6<br/>Fergusson<br/>Horwood<br/>Woodward</p> <p><b>Date:</b> 2001</p> | <p>New Zealand</p> | <p><b>Age:</b> 16-21</p> <p><b>N:</b> 1265</p> <p><b>Dx:</b> Any mental health dx</p> | <p>Longitudinal Study</p> <p>Personal interviews</p> | <p>The study examined exposure to unemployment and the positive correlation between the development of a mental health diagnosis or other disruptions in behaviour Related due to the virtue of common or correlated risk factors and causal processes “The selective process by which young people become unemployed may also be related to (or involved in) the process that young people develop psychosocial disorders”</p> | <p>Not applicable to article</p> | <p>More likely to be unemployed overall...</p> <ul style="list-style-type: none"> <li>• Alcohol use (20.8%)</li> <li>• Depression (15.3%)</li> <li>• Substance use (11.8%)</li> <li>• Suicidal Ideation (9.9%)</li> <li>• Property offending (9.6%)</li> </ul> <p>Violent offending (8.4%)</p> | <p>Questionable where this article fits...as it discusses a correlation between unemployment, with no true intervention?</p> |
|--------------------------------------------------------------------------|--------------------|---------------------------------------------------------------------------------------|------------------------------------------------------|---------------------------------------------------------------------------------------------------------------------------------------------------------------------------------------------------------------------------------------------------------------------------------------------------------------------------------------------------------------------------------------------------------------------------------|----------------------------------|------------------------------------------------------------------------------------------------------------------------------------------------------------------------------------------------------------------------------------------------------------------------------------------------|------------------------------------------------------------------------------------------------------------------------------|

1  
2  
3  
4  
5  
6  
7  
8  
9  
10  
11  
12  
13  
14  
15  
16  
17  
18  
19  
20  
21  
22  
23  
24  
25  
26  
27  
28  
29  
30  
31  
32  
33  
34  
35  
36  
37  
38  
39  
40  
41  
42  
43  
44  
45  
46  
47

|  |  |  |  |                                                                                                                                                                                                                                                                                                                                                                                                                                       |  |  |  |
|--|--|--|--|---------------------------------------------------------------------------------------------------------------------------------------------------------------------------------------------------------------------------------------------------------------------------------------------------------------------------------------------------------------------------------------------------------------------------------------|--|--|--|
|  |  |  |  | <p>47.2% of the sample reported being unemployed at some time during the interval from 16-21 years</p> <p>25.2% reported being unemployed for at least 3 months in at least one year</p> <p>13.4% reported being unemployed for at least 6 months in at least 1 year over the 5-year period</p> <p>Young people exposed to 6 months or greater unemployment in any given year had rates of mental health problems between 1.4 and</p> |  |  |  |
|--|--|--|--|---------------------------------------------------------------------------------------------------------------------------------------------------------------------------------------------------------------------------------------------------------------------------------------------------------------------------------------------------------------------------------------------------------------------------------------|--|--|--|

For peer review only

1  
2  
3  
4  
5  
6  
7  
8  
9  
10  
11  
12  
13  
14  
15  
16  
17  
18  
19  
20  
21  
22  
23  
24  
25  
26  
27  
28  
29  
30  
31  
32  
33  
34  
35  
36  
37  
38  
39  
40  
41  
42  
43  
44  
45  
46  
47

|                                                                         |     |                                                                                                           |                                                                                                                                                                                                                                                                                                                                                        |                                                                                                                                                   |                                                                                                                                                                                                                                                                         |                                                                                                                                                                                                 |                                                                                                                                                                                                |
|-------------------------------------------------------------------------|-----|-----------------------------------------------------------------------------------------------------------|--------------------------------------------------------------------------------------------------------------------------------------------------------------------------------------------------------------------------------------------------------------------------------------------------------------------------------------------------------|---------------------------------------------------------------------------------------------------------------------------------------------------|-------------------------------------------------------------------------------------------------------------------------------------------------------------------------------------------------------------------------------------------------------------------------|-------------------------------------------------------------------------------------------------------------------------------------------------------------------------------------------------|------------------------------------------------------------------------------------------------------------------------------------------------------------------------------------------------|
|                                                                         |     |                                                                                                           |                                                                                                                                                                                                                                                                                                                                                        | 8.4 times higher than their employed peers                                                                                                        |                                                                                                                                                                                                                                                                         |                                                                                                                                                                                                 |                                                                                                                                                                                                |
| 7<br>Froundfelker<br>Teachout<br>Bond<br>Drake<br><br><b>Date:</b> 2010 | USA | <b>Age:</b><br>Mean age<br>37<br><br><b>N:</b> 154<br><br><b>Dx:</b> Any<br>mental<br>health<br>diagnosis | Descriptive<br><br>Intervention:<br>Comprehensive<br>vocational<br>services at an<br>array of mental<br>health and<br>rehabilitation<br>services<br><ul style="list-style-type: none"><li>• Vocational<br/>engagement</li><li>• Vocational<br/>assessment</li><li>• Job searching</li><li>• Job retention</li><li>• Job leaving<br/>supports</li></ul> | The study<br>examined<br>whether<br>criminal justice<br>involvement<br>predicted<br>decreased<br>access / trouble<br>acquiring a job<br>for youth | Criminal<br>justice<br>involvement<br>did not predict<br>negative<br>competitive<br>employment<br>outcomes = not<br>a significant<br>barrier to<br>employment<br><br>Employment<br>specialists<br>augmented job<br>development<br>strategies to<br>overcome<br>barriers | Poor<br>employment<br>histories<br><br>Laws that<br>restrict<br>employment<br>of ex-<br>offenders in<br>certain fields<br><br>Informal<br>employer<br>screening that<br>blocks ex-<br>offenders | Self-reporting<br>regarding<br>criminal<br>justice<br>involvement<br><br>Lack of<br>employment<br>history data<br><br>Possible<br>sampling bias<br><br>Age too great<br>for scope of<br>review |
| 8<br>Guada<br>Conrad<br>Mares<br><br><b>Date:</b> 2012                  | USA | <b>Age:</b> 18-29<br><br><b>N:</b> 10<br><br><b>Dx:</b><br>Indigenous<br>youth (no<br>mental              | Descriptive<br><br>Intervention:<br>Collaboration<br>between college &<br>service providers<br>targeted at<br>indigenous youth                                                                                                                                                                                                                         | Study sought to<br>implement a<br>program<br>(Aftercare<br>Support<br>Program) that<br>supported<br>indigenous                                    | Support groups<br><br>Notion of<br>helping<br>someone else<br>to increase self-<br>efficacy                                                                                                                                                                             | Not fully<br>accessible<br>programs<br>(due to age<br>restrictions)<br><br>Programs that<br>are too                                                                                             | Population (no<br>mental health<br>dx)<br><br>Small sample<br>size                                                                                                                             |

|                                                     |     |                                                                                       |                                                                                                |                                                                                                                                                                                                                    |                                                                        |                                                                                                                                                                                                                                    |                                                                                                                                                                                        |
|-----------------------------------------------------|-----|---------------------------------------------------------------------------------------|------------------------------------------------------------------------------------------------|--------------------------------------------------------------------------------------------------------------------------------------------------------------------------------------------------------------------|------------------------------------------------------------------------|------------------------------------------------------------------------------------------------------------------------------------------------------------------------------------------------------------------------------------|----------------------------------------------------------------------------------------------------------------------------------------------------------------------------------------|
|                                                     |     |                                                                                       |                                                                                                | youth in a simple, cost-effective and supportive way.                                                                                                                                                              |                                                                        | narrowly targeted “Feast or famine” either perfect or not at all<br><br>Timing of programs<br><ul style="list-style-type: none"> <li>• Length too long</li> <li>• Start time too early</li> </ul><br>Limited follow-through skills |                                                                                                                                                                                        |
| 9<br>Henry Hasemi<br>Zhang<br><br><b>Date:</b> 2014 | USA | <b>Age:</b> 16-69<br><br><b>N:</b> 3474<br><br><b>Dx:</b> Any mental health diagnosis | Retrospective Study<br><br>Intervention: Examining employment outcomes achieved by SE programs | SE programs with higher fidelity to evidence-based practice standards found that clients served were 45% more likely to obtain jobs, and 52% more likely to work 20 hours or more per week.<br><br>Younger clients | High school education / GED<br><br>Younger age<br><br>Prior experience | None identified in this article                                                                                                                                                                                                    | Age range not within scope of review<br><br>Only able to assess fidelity at a single point in time at the end of the observation period → Do not know how the programs were performing |

1  
2  
3  
4  
5  
6  
7  
8  
9  
10  
11  
12  
13  
14  
15  
16  
17  
18  
19  
20  
21  
22  
23  
24  
25  
26  
27  
28  
29  
30  
31  
32  
33  
34  
35  
36  
37  
38  
39  
40  
41  
42  
43  
44  
45  
46  
47

|                                                                                  |           |                                                                                             |                                                                                                                                            |                                                                                                                                                                                                                                                                                    |                                                                                                                                                                                                                                                                     |                                                                                                                                                                                                            |                                |
|----------------------------------------------------------------------------------|-----------|---------------------------------------------------------------------------------------------|--------------------------------------------------------------------------------------------------------------------------------------------|------------------------------------------------------------------------------------------------------------------------------------------------------------------------------------------------------------------------------------------------------------------------------------|---------------------------------------------------------------------------------------------------------------------------------------------------------------------------------------------------------------------------------------------------------------------|------------------------------------------------------------------------------------------------------------------------------------------------------------------------------------------------------------|--------------------------------|
|                                                                                  |           |                                                                                             |                                                                                                                                            | were more likely to acquire jobs<br><br>Younger clients were more likely to have higher wages<br><br>Younger clients were more likely to work greater hour                                                                                                                         |                                                                                                                                                                                                                                                                     |                                                                                                                                                                                                            | prior to the intervention      |
| 10<br>Sherring<br>Robson<br>Morris<br>Frost<br>Tirupati<br><br><b>Date: 2010</b> | Australia | <b>Age:</b> 19-39<br>Mean age 27<br><br><b>N:</b> 43<br><br><b>Dx:</b> Any mental health dx | Descriptive<br><br>Intervention: Establishing formal communication processes between occupational therapists and three employment agencies | Examining the onset/diagnosis of mental illness occurring in late adolescence, which can result in a major disruption of vocational and educational development. This suggests employment should be a high priority in early intervention mental health programs<br><br>Employment | Having prior work experience<br><br>Occupational therapist involved in the vocational rehabilitation process to promote<br><ul style="list-style-type: none"> <li>• Education goals</li> <li>• Gain competitive employment</li> </ul> Educating other mental health | The following items were not identified as barriers:<br><ul style="list-style-type: none"> <li>• Length of illness</li> <li>• Self-reported course of illness</li> </ul> Excessive alcohol / substance use | Age not within scope of review |

|                                                        |        |                                                                                                                        |                                                                                                                                                   |                                                                                                                                                                                                                                                                                                                            |                                                                        |                |                                                                                       |
|--------------------------------------------------------|--------|------------------------------------------------------------------------------------------------------------------------|---------------------------------------------------------------------------------------------------------------------------------------------------|----------------------------------------------------------------------------------------------------------------------------------------------------------------------------------------------------------------------------------------------------------------------------------------------------------------------------|------------------------------------------------------------------------|----------------|---------------------------------------------------------------------------------------|
|                                                        |        |                                                                                                                        |                                                                                                                                                   | <p>Outcomes:</p> <ul style="list-style-type: none"> <li>• 78.8% were in entry-level positions in retail, customer service and hospitality</li> <li>• 57.6% were employed in areas identified as their job preference</li> </ul> <p>At the evaluation period (post 24 months), 60.6% of participants were still working</p> | clinicians about evidence-based practices in vocational rehabilitation |                |                                                                                       |
| <p>11<br/>Shor<br/>Aivhod</p> <p><b>Date:</b> 2011</p> | Israel | <p><b>Age:</b> 16-60</p> <p><b>N:</b> 6 staff members of the program</p> <p><b>Dx:</b> Any mental health diagnosis</p> | <p>Qualitative</p> <p>Intervention: Culturally oriented supported-education program investigated via open-ended interviews with staff members</p> | <p>Main themes of the article:</p> <ul style="list-style-type: none"> <li>• Strength-oriented approach</li> <li>• Providing individualized support as needed</li> <li>• Discussing Judaic</li> </ul>                                                                                                                       | Not Applicable                                                         | Not Applicable | <p>Study focused on supported education</p> <p>Age range not applicable to review</p> |

1  
2  
3  
4  
5  
6  
7  
8  
9  
10  
11  
12  
13  
14  
15  
16  
17  
18  
19  
20  
21  
22  
23  
24  
25  
26  
27  
28  
29  
30  
31  
32  
33  
34  
35  
36  
37  
38  
39  
40  
41  
42  
43  
44  
45  
46  
47

1  
2  
3  
4  
5  
6  
7  
8  
9  
10  
11  
12  
13  
14  
15  
16  
17  
18  
19  
20  
21  
22  
23  
24  
25  
26  
27  
28  
29  
30  
31  
32  
33  
34  
35  
36  
37  
38  
39  
40  
41  
42  
43  
44  
45  
46  
47

|                                                                       |         |                                                                                                                          |                                                                                                                                    |                                                                                                                                                           |                                                                                                                 |                          |                                                                                                                                          |
|-----------------------------------------------------------------------|---------|--------------------------------------------------------------------------------------------------------------------------|------------------------------------------------------------------------------------------------------------------------------------|-----------------------------------------------------------------------------------------------------------------------------------------------------------|-----------------------------------------------------------------------------------------------------------------|--------------------------|------------------------------------------------------------------------------------------------------------------------------------------|
|                                                                       |         |                                                                                                                          |                                                                                                                                    | Contents as a method to advance rehab process<br>Enhancing the sense of belonging and sense of inclusion                                                  |                                                                                                                 |                          |                                                                                                                                          |
| 12<br>Suvisaari et al.<br><br><b>Date:</b> 2009                       | Finland | <b>Age:</b> 19-34<br><br><b>N:</b> 1316<br><br><b>Dx:</b> Axis 1 mental health dx                                        | Structured clinical interviews<br><br>Intervention: Neuropsychological intervention                                                | Lower education and unemployment were strongly associated with current life-long mental health disorders, particularly involving substance use.           | Mental health dx<br><br>Lower education<br><br>No treatment for mental health dx                                | Not addressed in article | Not specifically to do with employment                                                                                                   |
| 13<br>Tandon<br>Latimore<br>Mitchell<br>Clay<br><br><b>Date:</b> 2015 | USA     | <b>Age:</b> 16-23<br>Mean age 19<br><br><b>N:</b> 782<br><br><b>Dx:</b> Employment training program attendees (no formal | Quasi-experimental study<br><br>Intervention: Employment training model (Youth Opportunities) combined with social and educational | This study explored if a mental health intervention integrated into an employment training program for youth disconnected from school and work can reduce | Coping skills<br><br>Great exposure to intervention indicated higher employment rates compared to control group | Depressive Symptoms      | The propensity score analysis adjusted only for observed covariates - Differences between intervention and control groups may still have |

1  
2  
3  
4  
5  
6  
7  
8  
9  
10  
11  
12  
13  
14  
15  
16  
17  
18  
19  
20  
21  
22  
23  
24  
25  
26  
27  
28  
29  
30  
31  
32  
33  
34  
35  
36  
37  
38  
39  
40  
41  
42  
43  
44  
45  
46  
47

|  |  |                          |          |                                                                                                                                                                                                                                                                                                                                                                                                                                                                                      |  |  |                                       |
|--|--|--------------------------|----------|--------------------------------------------------------------------------------------------------------------------------------------------------------------------------------------------------------------------------------------------------------------------------------------------------------------------------------------------------------------------------------------------------------------------------------------------------------------------------------------|--|--|---------------------------------------|
|  |  | mental health diagnosis) | services | <p>depressive symptoms and improved engaged coping strategies</p> <p>New employment training model included:</p> <ul style="list-style-type: none"> <li>• Certification classes</li> <li>• Resume building</li> <li>• Career development</li> <li>• Job placement services</li> </ul> <p>Great depressive symptoms at the beginning of the study, after the intervention, gave way to greater reduction in depressive symptoms and greater use of engaged coping strategies when</p> |  |  | existed due to unobserved confounders |
|--|--|--------------------------|----------|--------------------------------------------------------------------------------------------------------------------------------------------------------------------------------------------------------------------------------------------------------------------------------------------------------------------------------------------------------------------------------------------------------------------------------------------------------------------------------------|--|--|---------------------------------------|



1  
2  
3  
4  
5  
6  
7  
8  
9  
10  
11  
12  
13  
14  
15  
16  
17  
18  
19  
20  
21  
22  
23  
24  
25  
26  
27  
28  
29  
30  
31  
32  
33  
34  
35  
36  
37  
38  
39  
40  
41  
42  
43  
44  
45  
46  
47

|                                                                                   |           |                                                                                      |                                                                                                                                                                                                                                                                                                                                                                                                                 |                                                                                                                                                                                                                                                                                                                                                                         |                |                |                                                                          |
|-----------------------------------------------------------------------------------|-----------|--------------------------------------------------------------------------------------|-----------------------------------------------------------------------------------------------------------------------------------------------------------------------------------------------------------------------------------------------------------------------------------------------------------------------------------------------------------------------------------------------------------------|-------------------------------------------------------------------------------------------------------------------------------------------------------------------------------------------------------------------------------------------------------------------------------------------------------------------------------------------------------------------------|----------------|----------------|--------------------------------------------------------------------------|
|                                                                                   |           |                                                                                      |                                                                                                                                                                                                                                                                                                                                                                                                                 | compared to participants not receiving mental health services.                                                                                                                                                                                                                                                                                                          |                |                |                                                                          |
| 14<br>Tandon<br>Pallab<br>Maulik<br>Tucker<br>Sonenstein<br><br><b>Date: 2012</b> | Australia | <b>Age:</b> 16-24<br>Mean: 18.8<br><br><b>N:</b> 136<br><br><b>Dx:</b><br>Depression | Pre-Posttest to assess 3 outcomes: <ul style="list-style-type: none"> <li>• Depressive symptoms</li> <li>• Coping strategies</li> <li>• Receipt of mental health services</li> </ul><br>Intervention consisted of 3 components: <ul style="list-style-type: none"> <li>• Referral to onsite mental health clinician</li> <li>• Depressive prevention curriculum</li> </ul> Training for Youth opportunity staff | Study found no significant differences in race, sex, or age between participants completing baseline self-interview and those enrolling in youth opportunity centers<br><br>CES-D self-report instrument used to measure depression<br>CES-D Standard Deviation (SD) at baseline was 15.0 (10.1)<br>SD of baseline stress was 10.2 (5.5)<br>SD level of baseline social | Not Applicable | Not Applicable | Small sample size<br><br>Study did not look at any aspects of employment |

1  
2  
3  
4  
5  
6  
7  
8  
9  
10  
11  
12  
13  
14  
15  
16  
17  
18  
19  
20  
21  
22  
23  
24  
25  
26  
27  
28  
29  
30  
31  
32  
33  
34  
35  
36  
37  
38  
39  
40  
41  
42  
43  
44  
45  
46  
47

|  |  |  |  |                                                                                                                                                                                                                                                                                                                                                                                                                              |  |  |  |
|--|--|--|--|------------------------------------------------------------------------------------------------------------------------------------------------------------------------------------------------------------------------------------------------------------------------------------------------------------------------------------------------------------------------------------------------------------------------------|--|--|--|
|  |  |  |  | <p>support was 32.9 (5.7) CES-D during 12-month F/U increased to 16.5 (Not a significant change)</p> <p>Intervention did not have an overall effect on reducing the severity of depressive symptoms or increasing the use of coping strategies</p> <p>Challenge Model of Resilience— Findings concluded that moderate levels of stress were associated with a decrease in depressive symptoms (Curvilinear relationship)</p> |  |  |  |
|--|--|--|--|------------------------------------------------------------------------------------------------------------------------------------------------------------------------------------------------------------------------------------------------------------------------------------------------------------------------------------------------------------------------------------------------------------------------------|--|--|--|

1  
2  
3  
4  
5  
6  
7  
8  
9  
10  
11  
12  
13  
14  
15  
16  
17  
18  
19  
20  
21  
22  
23  
24  
25  
26  
27  
28  
29  
30  
31  
32  
33  
34  
35  
36  
37  
38  
39  
40  
41  
42  
43  
44  
45  
46  
47

|  |  |  |  |  |  |  |  |
|--|--|--|--|--|--|--|--|
|  |  |  |  |  |  |  |  |
|--|--|--|--|--|--|--|--|

For peer review only

## References

1. Statistics Canada. Census of Canada 2011 [Available from: <http://www12.statcan.gc.ca/census-recensement/index-eng.cfm> accessed August 31st, 2014].
2. Andrade LH, Alonso J, Mneimneh Z, et al. Barriers to mental health treatment: results from the WHO World Mental Health surveys. *Psychological medicine* 2014;44(6):1303-17. doi: 10.1017/s0033291713001943 [published Online First: 2013/08/13]
3. Kessler RC, Berglund P, Demler O, et al. Lifetime prevalence and age-of-onset distributions of DSM-IV disorders in the National Comorbidity Survey Replication. *Archives of general psychiatry* 2005;62(6):593-602. doi: 10.1001/archpsyc.62.6.593 [published Online First: 2005/06/09]
4. Mental Health Commission of Canada. Making the Case for Investing in Mental Health in Canada, 2013.
5. McDonald KC, Bulloch AG, Duffy A, et al. Prevalence of Bipolar I and II Disorder in Canada. *Canadian journal of psychiatry Revue canadienne de psychiatrie* 2015;60(3):151-6. [published Online First: 2015/04/18]
6. Kidd SA, McKenzie KJ, Virdee G. Mental health reform at a systems level: wideing the lens on recovery-orientated care. *Canadian Journal of Psychiatry - Revue Canadienne de Psychiatrie* 2014;59(5):243-49.
7. Jones PB. Adult mental health disorders and their age at onset. *The British journal of psychiatry Supplement* 2013;54:s5-10. doi: 10.1192/bjp.bp.112.119164 [published Online First: 2013/01/11]
8. Viner RM, Ozer EM, Denny S, et al. Adolescence and the social determinants of health. *Lancet* 2012;379(9826):1641-52. doi: 10.1016/s0140-6736(12)60149-4 [published Online First: 2012/04/28]
9. Slade M, Amering M, Farkas M, et al. Uses and abuses of recovery: implementing recovery-oriented practices in mental health systems. *World psychiatry : official journal of the World Psychiatric Association (WPA)* 2014;13(1):1-12.
10. McFarlane WR, Levin B, Travis L, et al. Clinical and Functional Outcomes After 2 Years in the Early Detection and Intervention for the Prevention of Psychosis Multisite Effectiveness Trial. *Schizophrenia bulletin* 2014 doi: 10.1093/schbul/sbu108 [published Online First: 2014/07/30]
11. Ellison ML, Klodnick VV, Bond GR, et al. Adapting Supported Employment for Emerging Adults with Serious Mental Health Conditions. *The journal of behavioral health services & research* 2014 doi: 10.1007/s11414-014-9445-4 [published Online First: 2014/11/14]
12. Hetrick SE, Bailey AP, Smith KE, et al. Integrated (one-stop shop) youth health care: best available evidence and future directions. *The Medical journal of Australia* 2017;207(10):S5-s18. [published Online First: 2017/11/14]
13. Bond GR, Drake RE. Making the case for IPS supported employment. *Administration and policy in mental health* 2014;41(1):69-73. doi: 10.1007/s10488-012-0444-6 [published Online First: 2012/11/20]
14. Hoffmann H, Jackel D, Glauser S, et al. Long-term effectiveness of supported employment: 5-year follow-up of a randomized controlled trial. *Am J Psychiatry* 2014;171(11):1183-90. doi: 10.1176/appi.ajp.2014.13070857 [published Online First: 2014/08/16]

15. Brimblecombe N, Knapp M, Murguia S, et al. The role of youth mental health services in the treatment of young people with serious mental illness: 2-year outcomes and economic implications. *Early intervention in psychiatry* 2017;11(5):393-400. doi: 10.1111/eip.12261 [published Online First: 2015/09/04]
16. Fusar-Poli P, McGorry PD, Kane JM. Improving outcomes of first-episode psychosis: an overview. *World psychiatry : official journal of the World Psychiatric Association (WPA)* 2017;16(3):251-65. doi: 10.1002/wps.20446 [published Online First: 2017/09/25]
17. Kozloff N, Stergiopoulos V, Adair CE, et al. The Unique Needs of Homeless Youths With Mental Illness: Baseline Findings From a Housing First Trial. *Psychiatric services (Washington, DC)* 2016:appips201500461. doi: 10.1176/appi.ps.201500461 [published Online First: 2016/06/02]
18. Mokdad AH, Forouzanfar MH, Daoud F, et al. Global burden of diseases, injuries, and risk factors for young people's health during 1990-2013: a systematic analysis for the Global Burden of Disease Study 2013. *Lancet* 2016;387(10036):2383-401. doi: 10.1016/s0140-6736(16)00648-6 [published Online First: 2016/05/14]
19. Kalinyak CM, Gary FA, Killion CM, et al. The Transition to Independence Process: Promoting Self-Efficacy in Transition-Aged Youths. *Journal of psychosocial nursing and mental health services* 2016;54(2):49-53. doi: 10.3928/02793695-20160119-06 [published Online First: 2016/09/21]
20. Stergiopoulos V, Gozdzik A, O'Campo P, et al. Housing First: exploring participants' early support needs. *BMC Health Serv Res* 2014;14:167. doi: 10.1186/1472-6963-14-167 [published Online First: 2014/04/15]
21. Patton GC, Sawyer SM, Santelli JS, et al. Our future: a Lancet commission on adolescent health and wellbeing. *Lancet* 2016;387(10036):2423-78. doi: 10.1016/s0140-6736(16)00579-1 [published Online First: 2016/05/14]
22. Anthony WA. Recovery from mental illness: the guiding vision of the mental health service system in the 1990's. *Psychosocial Rehabilitation Journal* 1993;16(4):11-23.
23. Slade M. Routine outcome assessment in mental health services. *Psychological medicine* 2002;32:1339-43.
24. Tse S, Tsoi EW, Hamilton B, et al. Uses of strength-based interventions for people with serious mental illness: A critical review. *The International journal of social psychiatry* 2016 doi: 10.1177/0020764015623970 [published Online First: 2016/02/03]
25. Naslund JA, Aschbrenner KA, Marsch LA, et al. The future of mental health care: peer-to-peer support and social media. *Epidemiology and psychiatric sciences* 2016;25(2):113-22. doi: 10.1017/s2045796015001067 [published Online First: 2016/01/09]
26. Bond GR, Drake RE, Campbell K. Effectiveness of individual placement and support supported employment for young adults. *Early intervention in psychiatry* 2014 doi: 10.1111/eip.12175 [published Online First: 2014/08/21]
27. Bassett J, Lloyd C, Bassett H. Work issues for young people with psychosis: Barriers to employment. *British Journal of Occupational Therapy* 2001;64:66-72. doi: 10.1177/030802260106400203
28. Latimer EA, Bond GR, Drake RE. Economic approaches to improving access to evidence-based and recovery-oriented services for people with severe mental illness. *Canadian journal of psychiatry Revue canadienne de psychiatrie* 2011;56(9):523-9. doi: 10.1177/070674371105600903 [published Online First: 2011/10/01]

- 1  
2  
3 29. Krueger JI, Vohs KD, Baumeister RF. Is the allure of self-esteem a mirage after all? *The*  
4 *American psychologist* 2008;63(1):64-5; discussion 65-6. doi: 10.1037/0003-  
5 066x.63.1.64 [published Online First: 2008/01/16]
- 6  
7 30. Orth U, Robins RW, Roberts BW. Low self-esteem prospectively predicts depression in  
8 adolescence and young adulthood. *Journal of personality and social psychology*  
9 2008;95(3):695-708. doi: 10.1037/0022-3514.95.3.695 [published Online First:  
10 2008/08/30]
- 11 31. Ellison ML, Danley KS, Bromberg C, et al. Longitudinal outcome of young adults who  
12 participated in a psychiatric vocational rehabilitation program. *Psychiatric rehabilitation*  
13 *journal* 1999;22(4):337-41.
- 14 32. Guada J, Conrad T, Mares A. The aftercare support program: an emerging group intervention  
15 for transition-aged youth. *Social Work with Groups* 2012;35(2):164-78.
- 16 33. Stone RA, Delman J, McKay CE, et al. Appealing Features of Vocational Support Services  
17 for Hispanic and non-Hispanic Transition Age Youth and Young Adults with Serious  
18 Mental Health Conditions. *The journal of behavioral health services & research*  
19 2015;42(4):452-65. doi: 10.1007/s11414-014-9402-2 [published Online First:  
20 2014/03/22]
- 21 34. Waghorn G, Hielscher E. The availability of evidence-based practices in supported  
22 employment for Australians with severe and persistent mental illness. *Australian*  
23 *occupational therapy journal* 2015;62(2):141-4. doi: 10.1111/1440-1630.12162  
24 [published Online First: 2014/10/22]
- 25 35. Harvey SB, Henderson M, Lelliott P, et al. Mental health and employment: much work still  
26 to be done. *The British journal of psychiatry : the journal of mental science*  
27 2009;194(3):201-3. doi: 10.1192/bjp.bp.108.055111 [published Online First: 2009/03/03]
- 28 36. Burke-Miller J, Razzano LA, Grey DD, et al. Supported employment outcomes for transition  
29 age youth and young adults. *Psychiatric rehabilitation journal* 2012;35(3):171-9. doi:  
30 10.2975/35.3.2012.171.179 [published Online First: 2012/01/17]
- 31 37. Dudley R, Nicholson M, Stott P, et al. Improving vocational outcomes of service users in an  
32 Early Intervention in Psychosis service. *Early intervention in psychiatry* 2014;8(1):98-  
33 102. doi: 10.1111/eip.12043 [published Online First: 2013/03/16]
- 34 38. Baksheev GN, Allott K, Jackson HJ, et al. Predictors of vocational recovery among young  
35 people with first-episode psychosis: findings from a randomized controlled trial.  
36 *Psychiatric rehabilitation journal* 2012;35(6):421-7. doi: 10.1037/h0094574 [published  
37 Online First: 2013/01/02]
- 38 39. Ferguson KM. Using the Social Enterprise Intervention (SEI) and Individual Placement and  
39 Support (IPS) models to improve employment and clinical outcomes of homeless youth  
40 with mental illness. *Social work in mental health* 2013;11(5) doi:  
41 10.1080/15332985.2013.764960 [published Online First: 2013/12/03]
- 42 40. Killackey E, Jackson HJ, McGorry PD. Vocational intervention in first-episode psychosis:  
43 individual placement and support v. treatment as usual. *The British journal of psychiatry*  
44 *: the journal of mental science* 2008;193(2):114-20. doi: 10.1192/bjp.bp.107.043109  
45 [published Online First: 2008/08/02]
- 46 41. Porteous N, Waghorn G. Developing evidence-based supported employment services for  
47 young adults receiving public mental health services. *New Zealand Journal of*  
48 *Occupational Therapy* 2009;56(1):34-39.
- 49  
50  
51  
52  
53  
54  
55  
56  
57  
58  
59  
60



42. Knapp M, Patel A, Curran C, et al. Supported employment: cost-effectiveness across six European sites. *World psychiatry : official journal of the World Psychiatric Association (WPA)* 2013;12(1):60-8. doi: 10.1002/wps.20017 [published Online First: 2013/03/09]
43. Arskey H, O'Malley L. Scoping studies: towards a methodological framework. *International Journal of Social Research Methodology: Theory and Practice* 2005;8(1):19-32.
44. Ferguson KM, Xie B, Glynn S. Adapting the Individual Placement and Support Model with Homeless Young Adults. *Child & Youth Care Forum* 2012;41(3):277-94.
45. Rinaldi M, McNeil K, Firm M, et al. What are the benefits of evidence-based supported employment for patients with first-episode psychosis? . 2004;28(8):281-84.
46. Waghorn G, Collister L, Killackey E, et al. Challenges to implementing evidence-based supported employment in Australia. *Journal of Vocational Rehabilitation*. 2007;27(1):29-37.
47. Tapfumaneyi A, Johnson S, Joyce J, et al. Predictors of vocational activity over the first year in inner-city early intervention in psychosis services. *Early intervention in psychiatry* 2015;9(6):447-58. doi: 10.1111/eip.12125 [published Online First: 2014/02/20]
48. Labonte R, Thompson P. Heart health inequalities in Canada: modules, theory and planning. *Health Promotion International* 1992;7(2):119-28.
49. Piat M, Sabetti J, Bloom D. The transformation of mental health services to a recovery-orientated system of care: Canadian decision maker perspectives. *The International journal of social psychiatry* 2010;56(2):168-77. doi: 10.1177/0020764008100801 [published Online First: 2010/03/09]
50. Gilmer TP, Ojeda VD, Leich J, et al. Assessing needs for mental health and other services among transition-age youths, parents, and providers. *Psychiatric services (Washington, DC)* 2012;63(4):338-42. doi: 10.1176/appi.ps.201000545 [published Online First: 2012/02/18]
51. Haber MG, Karpur A, Deschenes N, et al. Predicting improvement of transitioning young people in the partnerships for youth transition initiative: findings from a multisite demonstration. *The journal of behavioral health services & research* 2008;35(4):488-513. doi: 10.1007/s11414-008-9126-2 [published Online First: 2008/07/19]
52. Veldman K, Reijneveld SA, Ortiz JA, et al. Mental health trajectories from childhood to young adulthood affect the educational and employment status of young adults: results from the TRAILS study. *Journal of epidemiology and community health* 2015;69(6):588-93. doi: 10.1136/jech-2014-204421 [published Online First: 2015/02/11]
53. Luciano A, Bond GR, Drake RE. Does employment alter the course and outcome of schizophrenia and other severe mental illnesses? A systematic review of longitudinal research. *Schizophrenia research* 2014;159(2-3):312-21. doi: 10.1016/j.schres.2014.09.010 [published Online First: 2014/10/04]
54. Nochajski SM, Schweitzer JA. Promoting school to work transition for students with emotional/behavioral disorders. *Work (Reading, Mass)* 2014;48(3):413-22. doi: 10.3233/wor-131790 [published Online First: 2013/11/29]
55. Killackey E, Waghorn G. The challenge of integrating employment services with public mental health services in Australia: progress at the first demonstration site. *Psychiatric rehabilitation journal* 2008;32(1):63-6. doi: 10.2975/32.1.2008.63.66 [published Online First: 2008/07/11]

- 1  
2  
3 56. Cheungpasitporn W, Horne JM, Howarth CB. Adrenocortical carcinoma presenting as  
4 varicocele and renal vein thrombosis: A case report. *Journal of Medical Case Reports*  
5 2011;5(337) doi: <http://dx.doi.org/10.1186/1752-1947-5-337>  
6  
7 57. Rinaldi M, Perkins R, McNeil K, et al. The Individual Placement and Support approach to  
8 vocational rehabilitation for young people with first episode psychosis in the UK. *Journal*  
9 *of mental health (Abingdon, England)* 2010;19(6):483-91. doi:  
10 10.3109/09638230903531100 [published Online First: 2010/12/03]  
11 58. Brady WJ, Ferguson JD, Ullman EA, et al. Myocarditis: emergency department recognition  
12 and management. *Emergency Medicine Clinics of North America* 2004;22(4):865-85.  
13 59. Tandon SD, Latimore AD, Clay E, et al. Depression outcomes associated with an  
14 intervention implemented in employment training programs for low-income adolescents  
15 and young adults. *JAMA psychiatry* 2015;72(1):31-9. doi:  
16 10.1001/jamapsychiatry.2014.2022 [published Online First: 2014/11/13]  
17 60. Canadian Institutes for Health Research. Strategy for Patient-Oriented Research 2016  
18 [Available from: <http://www.cihr-irsc.gc.ca/e/41204.html> accessed September 6th 2016.  
19 61. Canadian Institutes for Health Research. Canada's Strategy for Patient-Oriented Research -  
20 Patient Engagement Framework 2015  
21 62. Frank L, Basch E, Selby JV. The PCORI perspective on patient-centered outcomes research.  
22 *Jama* 2014;312(15):1513-4. doi: 10.1001/jama.2014.11100 [published Online First:  
23 2014/08/29]  
24 63. Selby JV, Forsythe L, Sox HC. Stakeholder-Driven Comparative Effectiveness Research: An  
25 Update From PCORI. *Jama* 2015;314(21):2235-6. doi: 10.1001/jama.2015.15139  
26 [published Online First: 2015/11/26]  
27  
28  
29  
30  
31  
32  
33  
34  
35  
36  
37  
38  
39  
40  
41  
42  
43  
44  
45  
46  
47  
48  
49  
50  
51  
52  
53  
54  
55  
56  
57  
58  
59  
60



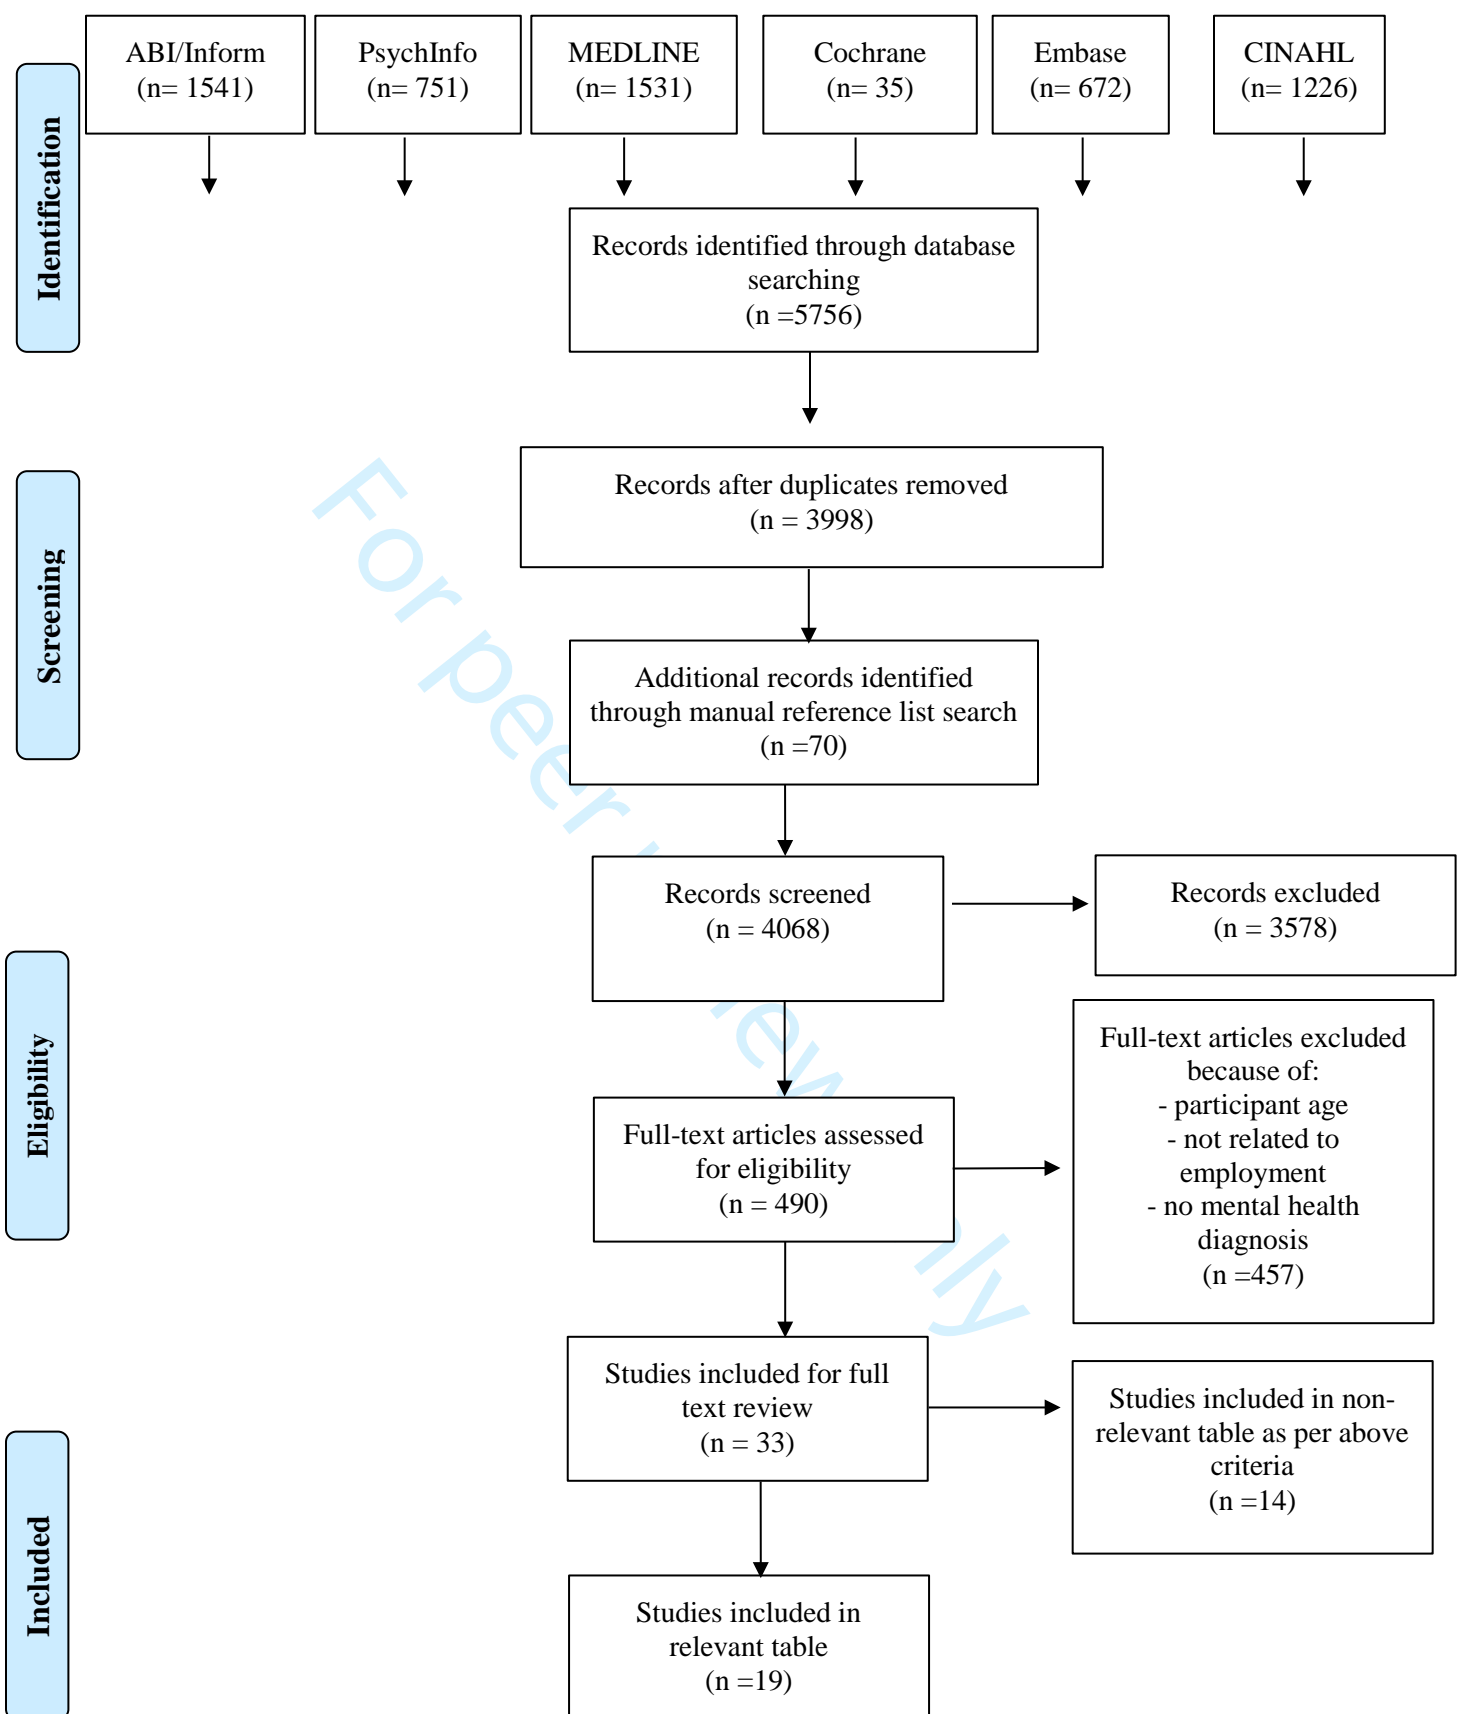

From: Moher D, Liberati A, Tetzlaff J, Altman DG, The PRISMA Group (2009). Preferred Reporting Items for Systematic Reviews and Meta-Analyses: The PRISMA Statement. PLoS Med 6(7): e1000097. doi:10.1371/journal.pmed1000097

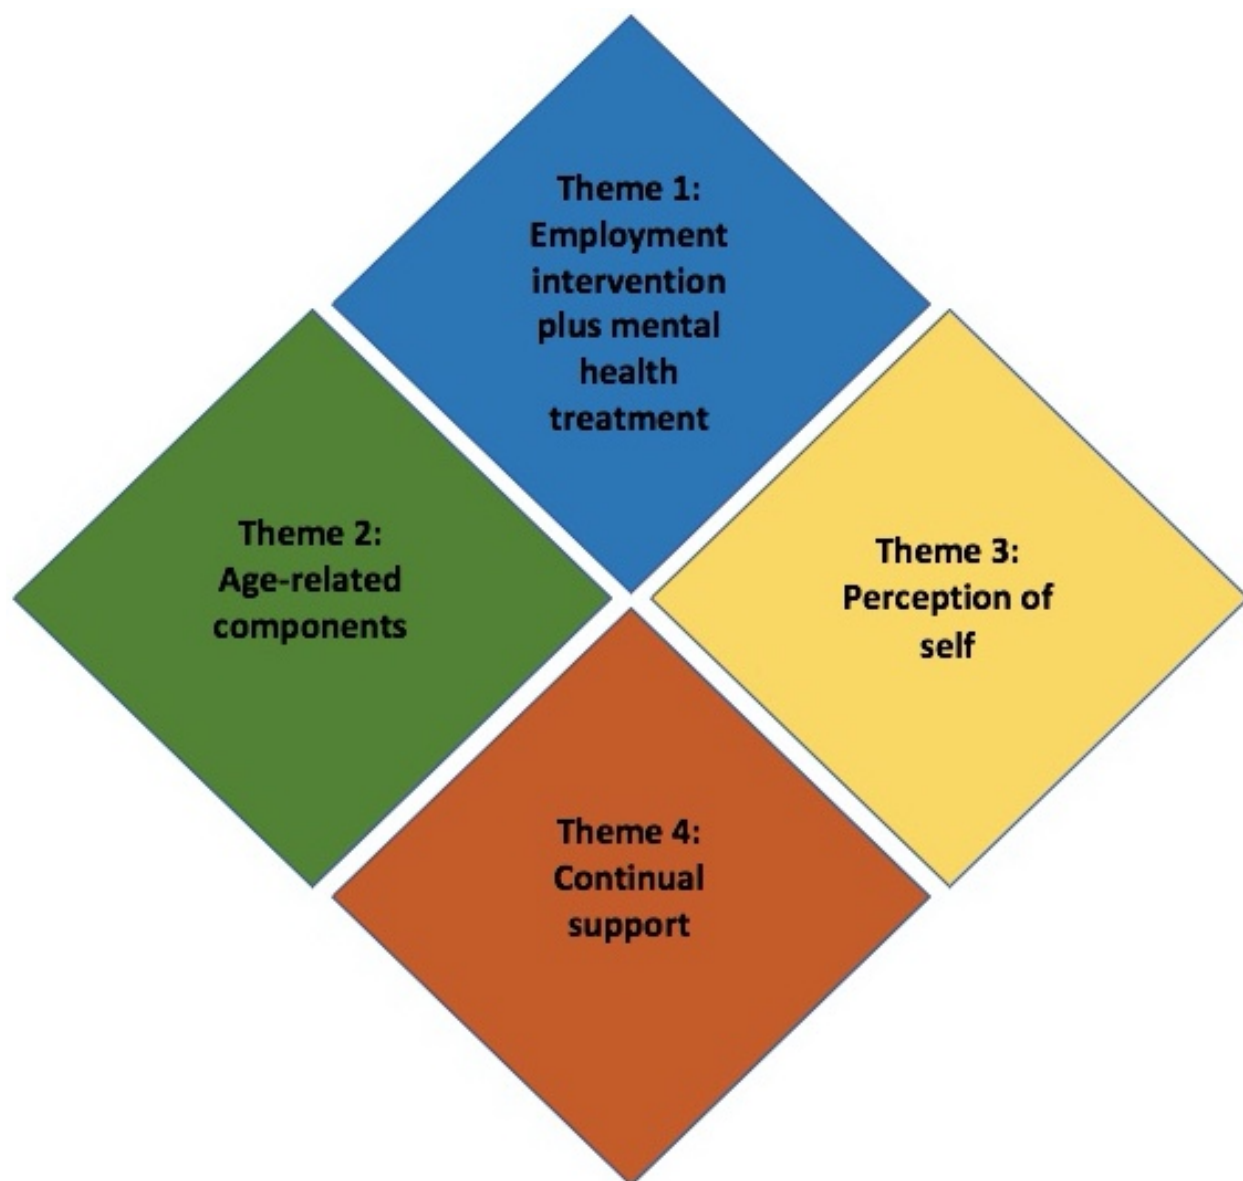

**Figure 2.** Summary of key themes found in the scoping review

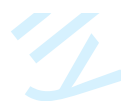

# BMJ Open

## Barriers and Facilitators to Employment for Young Adults with Mental Illness: A Scoping Review

|                                 |                                                                                                                                                                                                                                                                                                                                                                                                                                                                                                                                                                                                                                                                                                                                                                                                               |
|---------------------------------|---------------------------------------------------------------------------------------------------------------------------------------------------------------------------------------------------------------------------------------------------------------------------------------------------------------------------------------------------------------------------------------------------------------------------------------------------------------------------------------------------------------------------------------------------------------------------------------------------------------------------------------------------------------------------------------------------------------------------------------------------------------------------------------------------------------|
| Journal:                        | <i>BMJ Open</i>                                                                                                                                                                                                                                                                                                                                                                                                                                                                                                                                                                                                                                                                                                                                                                                               |
| Manuscript ID                   | bmjopen-2018-024487.R1                                                                                                                                                                                                                                                                                                                                                                                                                                                                                                                                                                                                                                                                                                                                                                                        |
| Article Type:                   | Research                                                                                                                                                                                                                                                                                                                                                                                                                                                                                                                                                                                                                                                                                                                                                                                                      |
| Date Submitted by the Author:   | 04-Oct-2018                                                                                                                                                                                                                                                                                                                                                                                                                                                                                                                                                                                                                                                                                                                                                                                                   |
| Complete List of Authors:       | Gmitroski, Taryn; University of British Columbia, Occupational Science and Occupational Therapy<br>Bradley, Christl ; University of British Columbia, Occupational Science and Occupational Therapy<br>Heinemann, Lyn; Canadian Mental Health Association, Vancouver Fraser Branch<br>Liu, Grace; Foundry, Vancouver Granville Centre<br>Blanchard, Paige; Foundry, Vancouver Granville Centre<br>Beck, Charlotte; University of British Columbia, Woodward Library<br>Mathias, Steve; Foundry; Centre for Health Evaluation Outcome Sciences<br>Leon, Adelena; University of British Columbia, Department of Occupational Science and Occupational Therapy<br>Barbic, Skye; University of British Columbia, Occupational Science and Occupational Therapy; Centre for Health Evaluation and Outcome Sciences |
| <b>Primary Subject Heading</b>: | Mental health                                                                                                                                                                                                                                                                                                                                                                                                                                                                                                                                                                                                                                                                                                                                                                                                 |
| Secondary Subject Heading:      | Health services research                                                                                                                                                                                                                                                                                                                                                                                                                                                                                                                                                                                                                                                                                                                                                                                      |
| Keywords:                       | employment, young adults, scoping review, MENTAL HEALTH                                                                                                                                                                                                                                                                                                                                                                                                                                                                                                                                                                                                                                                                                                                                                       |
|                                 |                                                                                                                                                                                                                                                                                                                                                                                                                                                                                                                                                                                                                                                                                                                                                                                                               |

SCHOLARONE™  
Manuscripts

# Barriers and Facilitators to Employment for Young Adults with Mental Illness:

## A Scoping Review

Taryn Gmitroski<sup>1,2</sup>, Christl Bradley<sup>1,2</sup>, Lyn Heinemann<sup>3</sup>, Grace Liu<sup>4,5</sup>, Paige Blanchard<sup>4,5</sup>,  
Charlotte Beck<sup>6</sup>, Steve Mathias<sup>1,5,7</sup>, Adelen Leon<sup>1,2</sup>, Skye P. Barbic, PhD<sup>1,2,5,6</sup>

<sup>1</sup> Faculty of Medicine, University of British Columbia, Vancouver, BC, Canada

<sup>2</sup> Department of Occupational Science and Occupational Therapy, UBC, Vancouver, BC, Canada

<sup>3</sup> Canadian Mental Health Association, Vancouver, BC, Canada

<sup>4</sup> Providence Health, Vancouver, BC, Canada

<sup>5</sup> Foundry, Vancouver, British Columbia, Canada

<sup>6</sup> University of British Columbia, Vancouver, BC, Canada

<sup>7</sup> Centre for Health Evaluation and Outcome Sciences, Vancouver, British Columbia, Canada

<sup>8</sup> Department of Psychiatry, St. Paul's Hospital, Vancouver, British Columbia, Canada

### Address correspondence to:

Skye Barbic, PhD, OT

Assistant Professor

Faculty of Medicine

Department of Occupational Science and Occupational Therapy

The University of British Columbia | St. Paul's Hospital

2255 Wesbrook Mall | Vancouver, BC Canada V6T 2A1

Phone 778-846-6134 | Fax 604-822-7756

skye.barbic@ubc.ca

**Keywords:** Young Adults, Employment, Mental Health • Barriers, Facilitators • Review

**Word count:** 4304

**DATA SHARING STATEMENT:** “dataset available from corresponding author upon request.

**CONFLICT OF INTEREST:** All authors declare that none have any conflict of interest related to the development or publishing of this manuscript.

**ACKNOWLEDGEMENTS:** Appreciation is extended to Dr. Letitia Henville, Department of Occupational Science and Occupational Therapy, University of British Columbia, for editorial support.

## ABSTRACT

**Objectives:** The issue of gaining employment for those with mental illness is a growing global concern. For many in the young adult population, who are at a transitional age, employment is a central goal. In response, we conducted a scoping review to answer the question, “What are the barriers and facilitators to employment for young adults with mental illness?”

**Design:** We conducted a scoping review in accordance to the Arksey and O’Malley framework. We performed a thorough search of Medline, EMBASE, CINAHL, ABI/INFORM, PsycINFO, and Cochrane. We included studies that considered young adults, aged 15–29 years of age with a mental health diagnosis, who were seeking employment or we included in an employment intervention.

**Results.** Our search resulted in 24 research articles that focused on employment for young adults with mental illness. Four main themes were extracted from the literature: (1) integrated health and social services, (2) age-exposure to employment supports, (3) self-awareness and autonomy, and (4) sustained support over the career trajectory.

**Conclusions.** Our review suggests that consistent youth-centred employment interventions, in addition to usual mental health treatment, can facilitate young adults with mental illness to achieve their employment goals. Aligning the mental health and employment priorities of young adults may result in improved health and social outcomes for this population while promoting greater engagement of young adults in care.

### Strengths and limitations of the study:

- Overview summary of the barriers and facilitators to employment for young adults with mental illness.

- Wide scope of barriers and facilitators were reviewed
- Full-text review and data extraction completed by two reviewers
- Most studies had small sample sizes and lacked consistent measurement of outcomes.

## INTRODUCTION

Mental illness is a widespread global challenge that affects approximately 1 in 4 young people at some point in their lives,<sup>1-3</sup> with 12–24 year olds experiencing the highest incidence of mental disorders of any age group.<sup>4,5</sup> Adolescence and early adulthood are considered the peak periods for the onset of mental illness, with 75% of all diagnoses having an onset before the age of 25 years.<sup>6-8</sup> Mental illness in young adults affects all education and income levels and all cultures.<sup>5,6</sup> <sup>9</sup> The global economic and societal burden of mental health disorders for this age group is rising at an alarming rate.<sup>9,10</sup> Nevertheless, this age group has been shown to have the greatest challenge in accessing mental health services.<sup>11,12</sup> Global mental health services have been described as “largely inadequate and unsuited to their [age-related] needs”.<sup>13,14</sup> There is an international call to urgently reexamine how mental health services are delivered for youth.<sup>10,12</sup> <sup>15-20</sup> In order to reduce the impact of mental illness, and to increase the likelihood of recovery for young people, transformative change and service redesign are necessary.<sup>21</sup>

Recovery, in the context of mental health care and psychosocial rehabilitation, is defined as “*the ability to live a full and meaningful life*”.<sup>22</sup> The greatest chance of recovery is associated with having an illness identified, receiving an intervention early, and accessing ongoing support.<sup>9,15,21,23-25</sup> One of the best indicators of recovery for adults with mental illness is the ability to obtain and maintain meaningful employment.<sup>11,26</sup> High-quality studies have repeatedly shown that employment is associated with reductions in negative symptoms

1  
2  
3 associated with a diagnosis of a mental illness, improvement in overall well-being, and enhanced  
4 perception of social inclusion and self-worth.<sup>11 27-32</sup> Yet approximately 70-90% of people with a  
5 serious mental health condition are unemployed—this despite increasing evidence suggests that  
6 the majority of them desire to work<sup>33-35</sup> Although limited research is available about how young  
7 adults with mental illness view employment as an outcome important for recovery, the promise  
8 of shifting towards what is important to youth and their families is now emphasized.<sup>12 36-40</sup>  
9  
10 Employment may not only be a promising outcome for young adults in terms of symptomatic  
11 and functional recovery, but also a mechanism to engage young people who may not otherwise  
12 have sought support from mental health services.<sup>12</sup>  
13  
14  
15  
16  
17  
18  
19  
20  
21  
22  
23

24 As research continues to emerge regarding timely integrated youth health services for  
25 young adults with mental illness<sup>12</sup>, there is a strong case for mental health services to integrate  
26 employment-support components within the current model of service delivery.<sup>41-44</sup> Incorporating  
27 employment into community mental health services for young adults may have a substantial  
28 impact at the individual, familial, and societal level, thereby advancing health-related outcomes  
29 for this population.<sup>45 46</sup> These impacts may include decreased hospital admissions, interaction  
30 with the justice system, improved mental health, and reduction of costs to the system.<sup>28 47</sup> Yet,  
31 most often, health and employment services are offered in silos, inherently rigid systems that do  
32 not communicate and can increase the potential for poor quality patient experiences and  
33 outcomes. In order to strengthen the case for preparing youth with mental illness early for  
34 employment, it is vital to researchers, clinicians, and policy makers to understand the barriers  
35 and facilitators to employment for the individuals and the system. This information will help  
36 communities strategize ways for health and social services to work together and meet the needs  
37 of young people and their families.  
38  
39  
40  
41  
42  
43  
44  
45  
46  
47  
48  
49  
50  
51  
52  
53  
54  
55  
56  
57  
58  
59  
60

1  
2  
3 The goal of this work is to understand the barriers and facilitators to employment for  
4 youth with mental illness. In this study, we outline the breadth of knowledge available regarding  
5 obtaining and maintaining employment for young adults with mental illness and implementing  
6 employment programs in mainstream mental health services.  
7  
8  
9  
10  
11

## 12 **METHODS**

13  
14  
15  
16 Our scoping review draw on existing literature to understand what is known about the barriers  
17 and facilitators to employment for young adults with mental illnesses. As compared to systematic  
18 reviews, scoping reviews have a very broadly defined research question, include all study types,  
19 and track data according to key issues and themes.<sup>43</sup> We followed a five-stage commonly used  
20 methodological framework<sup>48</sup> to complete this review, including: (1) identification of the research  
21 question, (2) identification of all relevant studies, (3) selection of studies for detailed analysis,  
22 (4) charting of the data according to key concepts, and (5) collation and summarizing the  
23 findings of selected studies.  
24  
25  
26  
27  
28  
29  
30  
31  
32  
33  
34

35 For the first stage of the scoping review, the research question that guided the review  
36 was: *“What are the barriers and facilitators to employment for young adults with mental*  
37 *illness?”* In stage 2 of the review, a reference librarian was consulted in order to identify search  
38 terms, identify relevant databases, and build the search protocol with the team. Our team derived  
39 significant terms derived from the research question and expanded upon these terms to create a  
40 comprehensive list of primary search words and their variants, including “mental disorders”,  
41 “anxiety disorders”, “bipolar”, “dissociative disorders”, “multiple personality disorder”, “mood  
42 disorders”, “personality disorders”, and “schizophrenia or psychotic disorders”, as well as a  
43 combination of the following work-related terms: “employment”, “employment, supported”,  
44 “unemployment”, “workplace”, and “occupation” (see Table 1). Combination of these terms  
45  
46  
47  
48  
49  
50  
51  
52  
53  
54  
55  
56  
57  
58  
59  
60



1  
2  
3 were tested iteratively across the following databases on July 28, 2016: MEDLINE® (1946–July  
4  
5 2016), ABI/inform® (1986–July 2016), CINAHL® (1982–July 2016), Embase® (1974–July  
6  
7 2016), PsycINFO® (1880–July 2016), and Cochrane® (2005–July 2016) to allow for the  
8  
9 identification of new combinations of terms or other related citations. In the late–1980s,  
10  
11 frameworks for incorporating employment into health services for young adults with disabilities  
12  
13 began to be incorporated in clinical practice.<sup>49–54</sup> As a results, our scoping review search was  
14  
15 limited to studies from January 1985 and beyond. We also searched Medical Subject Heading  
16  
17 (MeSH) terms, MeSH tree, and related terms found in keywords and article references, and  
18  
19 truncation was used for maximum recall when applicable. All searches included at least one  
20  
21 identifier for mental disorder linked to at least one identifier for employment. The initial cutoff  
22  
23 day for this scoping review was July 28, 2016. A Google Scholar and Medline follow-up search  
24  
25 was conducted on October 1<sup>st</sup>, 2018, to ensure any new studies were included. Table 1 outlines  
26  
27 the search strategy used in each data base.  
28  
29  
30  
31  
32

33 We included studies with employment-seeking young adults, aged 15–29 years of age  
34  
35 with a mental health diagnosis. This age group was chosen in order to best reflect the context of  
36  
37 study and the challenges faced by those with an emerging mental illness who are attempting to  
38  
39 seek paid work. We recognize, in many bodies of literature, youth are defined as 15-24 years<sup>12</sup>.  
40  
41 Many sources of peer-reviewed literature reference the 1981 United Nations report<sup>55</sup>, where the  
42  
43 Secretary-General first referred to this age definition in a report to the General Assembly on  
44  
45 International Youth Year (A/36/215, para. 8 of the annex)<sup>56</sup> and endorsed it in ensuing reports  
46  
47 (A/40/256, para. 19 of the annex)<sup>57</sup>. However, in the report<sup>55</sup>, the Secretary-General also  
48  
49 highlighted that, “the meaning of the term ‘youth’ varies in different societies around the world.”  
50  
51  
52 For example, in Canada, most youth employment programs are targeted for youth <30 years old.  
53  
54  
55  
56  
57  
58  
59  
60

1  
2  
3 As such, the definitions of age (<30) and each other aspect of the population (mental health  
4 status, gender, ethnicity), have been left broad in order to maintain a wide approach that  
5 generates a breadth of coverage of the topic.  
6  
7  
8  
9

10 For stage three of the scoping review, two research team members (TG & CB)  
11 independently screened all titles and abstracts of all studies identified in the electronic search.  
12  
13 We included all relevant articles published in English or French that described employment  
14 services for young adults with mental illness. In addition, we limited our search to human  
15 subjects, and studies with young adults under 30 years old. The main qualifications that  
16 determined if studies were included in the relevant tables were: (1) the population was in the  
17 young adult age range of 15–29 years, (2) the population had a mental illness diagnosis, and (3)  
18 the study had a primary focus on attaining employment. If all three of these criteria were  
19 addressed, the barriers and facilitators in the study were examined and extracted. Country of  
20 origin and study format did not have any influence on determining relevance to this scoping  
21 review. We did not screen for methodology or levels of evidence.  
22  
23  
24  
25  
26  
27  
28  
29  
30  
31  
32  
33  
34  
35  
36

37 In order to chart the data, we synthesized the studies and sorted them according to key  
38 themes, barriers, and facilitators. Barriers and facilitators were sorted according to have they  
39 were specified in the article. If not such specification was available, three content experts (SB,  
40 LH, GL) with over ten years of clinical experience were consulted to determine what category  
41 the theme should be placed. We charted data based on author, year of publication, study location  
42 study type, intervention (if applicable), study population, and key results (barriers and facilitators  
43 to employment).  
44  
45  
46  
47  
48  
49  
50  
51  
52

53 Finally, we synthesized and sorted data according to key issues and themes to present a  
54 narrative account of the existing literature.<sup>48</sup> Themes were categorized broadly. All team  
55  
56  
57  
58  
59  
60

1  
2  
3 members reviewed the themes and consensus was reviewed for the label of each theme. The  
4  
5 main purpose of this scoping review was to identify the breadth of literature in this area of study,  
6  
7 and whether there are any gaps in service found within the subject matter. As a result, we did not  
8  
9 complete an assessment of the quality of evidence, nor did we determine whether particular  
10  
11 studies provide robust or generalizable findings.<sup>48</sup>  
12  
13  
14

### 15 **Patient and Public Involvement:**

16  
17  
18 This study is related to a prospective study currently underway examining the experiences of  
19  
20 young adults participating in an employment interventions (study PI: Barbic). The research  
21  
22 question and data extraction variables for this study were informed by young adults participating  
23  
24 in an existing employment program in Vancouver, Canada. Two focus groups of eight youth, age  
25  
26 19-29, were invited to participate. Participants were recruited through a youth health centre in  
27  
28 Vancouver called Foundry (foundrybc.ca) and the surrounding community. Results of this study  
29  
30 will be presented to these participants (November 2018) in a modified world-café format. A one  
31  
32 page summary of project will also developed and disseminated to the Foundry centres in British  
33  
34 Columbia (n=7) and targeted policy and health services decision-makers.  
35  
36  
37  
38

## 39 **RESULTS**

40  
41  
42 The initial search generated a total of 8037 results. After removing duplicates and performing a  
43  
44 preliminary screen to ensure the inclusion criteria was met, a total of 488 titles and abstracts  
45  
46 were identified. These were further screened to ensure that they addressed the appropriate age  
47  
48 range, that they had a focus on employment, and that the participants had a diagnosis of a mental  
49  
50 illness. As stated in terms of selection criteria, manual screening performed by the researchers  
51  
52 generated a total of 33 articles that were carefully examined, and divided into relevant (n=19)  
53  
54  
55  
56  
57  
58  
59  
60

1  
2  
3 and non-relevant studies (n=14). After the updated search from 2016- Oct 1<sup>st</sup>, 2018, we found an  
4  
5 additional five articles include in the review (total n=24 articles). Table 2 lists the relevant  
6  
7 studies and Figure 1 describes the details for how we arrived at the final set of studies.  
8  
9

10 [insert Table 2 here]

11  
12  
13 [insert Figure 1 here]

14  
15  
16 Of the 24 relevant articles, 11 were from the United States, four were from Australia, four  
17  
18 from the United Kingdom, two from Canada, one from New Zealand, and one from the  
19  
20 Netherlands. Results showed that a concentration on employment for young adults with mental  
21  
22 illness is occurring, for the most part, in the Western world, with the United States being the  
23  
24 focal area of research, primarily in the area of first episode psychosis and early intervention  
25  
26 treatment. Of the 124 articles, 8 were published between 1999–2009, and 15 were published  
27  
28 between 2010–2018. Although the search criteria allowed for articles published from 1985, the  
29  
30 researchers were unable to identify any relevant articles from 1985–1998.  
31  
32  
33  
34

35  
36 This scoping review identified several themes in regards to the barriers and facilitators to  
37  
38 employment for youth with mental illness. As shown in Figure 2, the four main themes extracted  
39  
40 from the literature were: (1) integrated health and social services, (2) age-exposure to  
41  
42 employment supports, (3) self-awareness, and (4) sustained support over the career trajectory.  
43  
44

45 [insert Figure 2 here]

### 46 47 48 49 50 51 **(1) Integrated health and social services**

1  
2  
3 The scoping review found that having an employment intervention in addition to usual mental  
4 health treatment led to higher success rates for young adults with mental illness<sup>15 42-44 58-64</sup> (as  
5 identified in Table 2). For example, one youth-tailored employment intervention resulted in 65%  
6 of the intervention group gaining employment, compared to only 9% of the control group.<sup>45</sup> Two  
7 studies found that youth-tailored employment support, when delivered concurrently with  
8 conventional mental health therapies, led to improved health and employment outcomes.<sup>41 43</sup>  
9  
10 Porteous and Waghorn<sup>46</sup> suggested that having both interventions (health and employment) in  
11 the same physical site mutually reinforced these successes.  
12  
13  
14  
15  
16  
17  
18  
19  
20  
21

22 Throughout many of the studies review, the two central frameworks were often when  
23 addressing employment outcomes for youth—specifically, the recovery-oriented framework and  
24 the biomedical model. The biomedical model was defined as physical or biological aspects of  
25 disease and illness. In these studies, success was achieved when there is an absence of the  
26 disease and/or disorder or improvement in symptomology.<sup>65</sup> In contrast, the recovery model  
27 focuses on “living a satisfying, hopeful, contributing life, despite psychiatric disability or  
28 symptoms”. (p.168)<sup>66</sup> Our results suggest that the paradigm used to guide intervention and care  
29 may shape how young adults gain and maintain employment. For instance, two studies  
30 highlighted that the biomedical model was a major barrier to finding employment for this  
31 population<sup>46 67</sup>, and three studies suggested that the recovery-oriented framework was a  
32 facilitator to increased rates employment for young adults, based on its holistic perspective of  
33 physical, mental, social, and spiritual health<sup>41 59 68</sup>  
34  
35  
36  
37  
38  
39  
40  
41  
42  
43  
44  
45  
46  
47  
48  
49  
50  
51  
52

## 53 **(2) Age-exposure to employment support**

54  
55  
56  
57  
58  
59  
60

1  
2  
3 While the literature is still growing for this population, the scoping review found many  
4 suggestions that age-exposure to employment-related interventions was critical to employment  
5 success and sustainability. Studies in this review suggested that earlier exposure to employment  
6 programming was associated improved long-term employment outcomes and more engagement  
7 from youth in other areas of treatment and rehabilitation.<sup>41 42 44 46 58 61 63 69 70</sup> Some studies also  
8 emphasized that in addition to early employment intervention, early diagnosis of a mental illness  
9 was also essential to ensure that young adults have access to the full range of treatments and  
10 interventions needed to optimize their potential to self-manage with their condition and thrive in  
11 the community.<sup>71 15 63</sup> The review also highlighted a need to include and reach out to families  
12 and social networks early. Family and friends were reported in two studies as discouraging youth  
13 from employment and thereby acting as barriers.<sup>64 72 73</sup>

14  
15  
16  
17  
18  
19  
20  
21  
22  
23  
24  
25  
26  
27  
28  
29 One of the main temporal issues that was discussed across several studies the focus on  
30 “finding a job” as opposed to seeking a “long-term career”. The goal of finding a career was  
31 described in the literature as a potential barrier and not always applicable to this age group.<sup>41 68</sup>  
32 Some studies in the review highlighted that youth felt many existing programs were too focused  
33 on “getting a job” rather than supporting milestones along journey of employment and career  
34 construction.<sup>60 74</sup> The results of this review yielded a concentration of studies focused on  
35 supporting young adults to have a variety of skill development experiences, thereby helping a  
36 young adult achieve their goal of finding a first job.<sup>41 42 44 46 74</sup>

### 31 32 33 34 35 36 37 38 39 40 41 42 43 44 45 46 47 48 49 50 51 **(3) Self-awareness and autonomy**

52  
53 All studies collectively identified that seeking employment can be a challenging endeavor,  
54 especially for young adults doing so for the first time. For better chances of success in finding  
55  
56  
57  
58  
59  
60

1  
2  
3 employment, studies in the review suggested that harnessing feelings of hope and optimism  
4 about themselves and their career prospects is vital to employment success.<sup>41</sup> Some studies  
5 identified that young adults reported feeling more optimistic about jobs in which they can learn  
6 and progress, leading to greater senses of accomplishment and self-worth.<sup>41 74</sup> One participant in  
7 study #2 described the impact of employment on self-esteem as  
8  
9

10  
11  
12  
13  
14  
15 *“a vicious circle, ‘cause you don’t have any work and you don’t bring in an income and*  
16 *it gives you no self-esteem, and then you don’t want to get up and go get a job”*<sup>27</sup> ( p. 68).  
17  
18  
19

20 Self-worth and self-esteem were identified throughout all studies as being important for this age  
21 group.  
22  
23

24  
25  
26 Our review also found that programs that allowed participants to choose the jobs they  
27 pursue empowered these youth to take control of their career goals and aspirations for the future,  
28 in addition to finding employment.<sup>42 44</sup> The ability to choose was identified as a central asset for  
29 this age group: our review identified that, while many programs focus primarily on the retention  
30 of jobs, the young people themselves do not always share this priority. Giving young adults the  
31 right to both choose and leave jobs, allowing them to explore career opportunities, and pursuing  
32 opportunities to develop more skills were key facilitators to job and career development for this  
33 population.<sup>41 44</sup>  
34  
35  
36  
37  
38  
39  
40  
41  
42  
43

#### 44 45 **(4) Sustained integrated care**

46  
47 Sustained employment support was identified as a major barrier to short- and long-term  
48 employment success for young adults. Many of the studies identified in this review did not  
49 continue to provide support for participants beyond the end of the job-seeking period.<sup>41-44</sup> The  
50 short duration of support was identified as a major barrier for young adults with mental illness  
51  
52  
53  
54  
55  
56  
57  
58  
59  
60

1  
2  
3 (ranging from 2-16 weeks). The scoping review highlighted that programs with short follow-up  
4 periods were more likely than programs with long follow-up periods to result in poor  
5 employment outcomes for youth.<sup>27 42 60</sup> Although the studies reviewed are relatively recent, the  
6 data support the benefits of continued support to help youth with their employment goals.<sup>69</sup> For  
7 example, a number of studies<sup>42 44 75</sup> suggested that youth employment programs may work best  
8 when focusing on the continued success of retaining employment and career development in  
9 general.<sup>68 76-79</sup> Of critical importance, most studies in this review suggested that ongoing support  
10 that integrates both health and employment or career development goals is a significant  
11 facilitator to ensure that young adults with mental illness have the capacity to gain the skills  
12 necessary to manage long-term employment.<sup>27 31 41 46 58 63 68 69 72 80</sup>

## DISCUSSION

29 This review describes the current literature related to the facilitators and barriers for young adults  
30 with mental illness who are seeking employment. A scoping review was chosen in order to  
31 determine the breadth of the literature for this topic. While there were no other systematic  
32 reviews or meta-analyses of the literature identified in this research area, this scoping review did  
33 identify a number of studies that investigated adults (age 29+) with mental illness who were  
34 seeking employment. These studies were excluded based on the allotted age range criteria.  
35 However, they nonetheless found similarities to the studies included as relevant in the scoping  
36 review such as the importance of integrated support, sustained access to health and employment  
37 services that are not time-limited, and a focus on employment as a vehicle towards improved  
38 health outcomes.<sup>14 81 82</sup>

51  
52 This scoping review identified 24 relevant articles, of which there were a number of  
53 methodologies, type of interventions, and/or research questions. This disparity suggests that the  
54  
55



1  
2  
3 literature in this field of study is still developing, and alludes to the diverse approaches to the  
4 understanding the field. The articles were published between 1999–2018, with the majority  
5 (n=16) published between 2010–2018. The studies were predominantly completed in English-  
6 speaking countries (n=23) with a high volume from the United States (n=12), with others  
7 completed in Australia (n=4), New Zealand (n=1), and the United Kingdom (n=4). Common  
8 facilitators included high self-efficacy<sup>31 43 68</sup> early intervention,<sup>27 41 46 68 69</sup> participation in a  
9 supported employment program,<sup>31 41 45 46 58 68 83</sup> and a long-term follow-up after intervention.<sup>27 41</sup>  
10 Barriers included the use of exclusion criteria,<sup>41 58 68</sup> lack of social capital<sup>61 64 75</sup>, stigma in the  
11 workplace<sup>27 64</sup>, history of criminal justice involvement,<sup>44 58</sup> inadequate training opportunities<sup>27 61</sup>  
12 <sup>73</sup>, and lack of ongoing integrated funding for programming.<sup>27 68</sup>

13  
14  
15  
16  
17  
18  
19  
20  
21  
22  
23  
24  
25  
26 Amongst these barriers, four overarching themes were identified in this review. These  
27 themes may add value to the way that employment and health services are currently designed  
28 and implemented for the young adult population. Our review emphasized that the transition from  
29 adolescence to adulthood is a typical process of development, but for many young adults with  
30 mental health conditions, this transition can be especially difficult.<sup>69</sup> Most studies highlighted  
31 that young adults are within an age range that has unique needs that are often different from  
32 those of older adults. Creating a program designed specifically for this age group may allow  
33 professionals to better understand their needs, and provides opportunities to further young  
34 people's professional development despite the barriers of mental illness. For the young adult  
35 population, retaining the same job may not be indicative of a successful employment pattern;  
36 rather, our review suggests that young people with mental illness may require the opportunity to  
37 explore various jobs in order to expand their skill set. Our review suggests that young adults with  
38 mental health conditions should be afforded the same opportunity as their peers by receiving  
39  
40  
41  
42  
43  
44  
45  
46  
47  
48  
49  
50  
51  
52  
53  
54  
55  
56  
57  
58  
59  
60

1  
2  
3 tailored supported employment programs designed to support their dynamic health and  
4 employment goals.<sup>41</sup> As well, increasing studies emphasize that young adults should be involved  
5 in co-designing these integrated services so that they are centred on the needs of youth, rather  
6 than the system alone.<sup>12 40</sup> Most studies in our review emphasized that long-term follow-up  
7 support is critical for this population to help them to navigate the employment landscape. As  
8 youth acquire new jobs, they may also benefit from continued support throughout these  
9 subsequent transitions to maximize their success, self-esteem, and overall well-being.

10  
11  
12  
13  
14  
15  
16  
17  
18  
19 Our scoping review results support emerging literature that suggests that vocational  
20 interventions at the onset of illness can have both short-term and long-term effects, including the  
21 development of skills and interests, and a decrease in the likelihood of chronic unemployment  
22 which in turn can shape health outcomes.<sup>27 41-45 58 67-69 74 84 85</sup> Our review did highlight notable  
23 heterogeneity in the interventions delivered; however, one common theme was that supported  
24 employment intervention, when integrated with mental health treatment, may offer young adults  
25 an increased probability for employment success. More research is needed to outline evidence-  
26 based models of employment support for this group that can be integrated into existing health  
27 services. Such information will be important when helping youth learn to self-manage their  
28 illness while achieving their employment goals.<sup>44</sup> As well, this information is critical information  
29 to support policy decisions to fund employment interventions as core services for youth mental  
30 health services and programs.

31  
32  
33  
34  
35  
36  
37  
38  
39  
40  
41  
42  
43  
44  
45  
46  
47 Another area of future research is to understand the components of supported  
48 employment interventions that can produce meaningful outcomes for youth. Our review  
49 identified a lack of standardization for how these services have been developed and delivered.  
50  
51  
52  
53  
54 More work in close collaboration with youth and key stakeholders is needed (i.e., clinicians,

1  
2  
3 family, funders) to tailor supported employment programs that can be scaled across mental  
4 health services and can be delivered early in the care pathway.<sup>86</sup> Given the increasing emphasis  
5 on patient-oriented research across developed countries,<sup>87-90</sup> there is an ideal opportunity for  
6 future research in this area to be conducted in partnership with relevant stakeholders, notably  
7 youth. By working with youth research partners to develop and test such interventions, mental  
8 health services have the opportunity to foster evidence-informed health care by bringing  
9 innovative rehabilitation approaches to the point of care for young adults with mental illness.

10  
11  
12  
13  
14  
15  
16  
17  
18  
19 While it is not the main tenet of a scoping review, it must be acknowledged that a  
20 thorough investigation into the quality of the literature was not completed. Despite the lack of  
21 analysis based on study rigor, our review did identify that many studies were descriptive in  
22 methodology and did not include control groups. As well, most studies had small sample sizes  
23 and lacked consistent measurement of outcomes. In order to optimize decision-making, evidence  
24 from well-designed studies is needed to develop health services, guidelines, and policies that  
25 apply to this young adult population. Such clarity around employment and integrated approaches  
26 to treatment may have significant potential to improve performance, accountability, and  
27 innovation of youth mental health services worldwide.

28  
29  
30  
31  
32  
33  
34  
35  
36  
37  
38  
39  
40 In conclusion, the health and wellbeing of young adults with mental illness is a topic of  
41 global concern. Our review suggests that the employment goals of the young adult population are  
42 important to them, and therefore should be recognized by the mental health system as an area to  
43 address and improve upon. This paper presents preliminary evidence for the benefit of  
44 integrating employment intervention and mental health services, specifically highlighting the  
45 barriers and facilitators for this population to obtain employment. Collectively, the studies  
46 included in the review emphasize that it cannot be assumed that young adults can be fit into an

1  
2  
3 adult model of care in relation to their employment and mental health needs; tailored programs  
4  
5 are required to address youth-specific needs. Aligning the mental health and employment  
6  
7 priorities of young adults may enable efficiency in achieving improved outcomes for this  
8  
9 population while promoting greater engagement of young adults in care and accountability of  
10  
11 mental health services worldwide.  
12  
13  
14  
15

## 16 **Figure Legends:**

17  
18 **Figure 1:** PRISMA diagram outlining study selection

19 **Figure 2:** Common themes found in the scoping review about the barriers and facilitators to  
20 employment for young adults with mental illness  
21  
22

## 23 **CONTRIBUTORSHIP STATEMENT**

24  
25 Skye Barbic is the senior and corresponding author. She has taken the primary responsibility for  
26 communication with the journal during the manuscript submission, peer review, and publication  
27 process, and has ensured that all the journal's administrative requirements, such as providing  
28 details of authorship, and gathering conflict of interest forms and statements, are properly  
29 completed, although these duties may be delegated to one or more coauthors. Skye Barbic has  
30 also designed the study, contributed to the writing of the manuscript and oversight of graduate  
31 student responsibilities to complete this work.  
32  
33

34 Taryn Gmitroski and Christl Bradley conducted the scoping review, participated in data  
35 extraction and synthesis, and wrote the first draft of the paper for submission as their research  
36 project for completion of a Master's degree in Occupational Therapy at the University of British  
37 Columbia.  
38  
39

40 Lyn Heinemann, Grace Liu, Paige Blanchard, and Steve Mathias contributed to the study design,  
41 search strategy, interpretation of study results, and review of the manuscript. All four authors  
42 reviewed the accuracy and integrity of the work. All four authors provided specific content  
43 clinical expertise to inform the discussion and implications of the study results (from the  
44 perspective of occupational therapy, psychiatry and peer support).  
45  
46

47 Adelen Leon was the research coordinator on the project. She coordinated all aspects of the  
48 study, including drafting the protocol, acting as the byline between the library and the students,  
49 reviewing the first draft of the manuscript, and addressing reviewer comments.  
50

51 Charlotte Beck was the study librarian on the study. She co-built the search strategy with the  
52 graduate students and contributed to the draft and review of the methods of this manuscript. She  
53 also reviewed the accuracy and integrity of the work.  
54  
55  
56  
57  
58  
59  
60

1  
2  
3 **ACKNOWLEDGEMENTS:** Appreciation is extended to Dr. Letitia Henville, Department of  
4 Occupational Science and Occupational Therapy, University of British Columbia, for editorial  
5 support.  
6  
7  
8  
9  
10  
11  
12  
13  
14  
15  
16  
17  
18  
19  
20  
21  
22  
23  
24  
25  
26  
27  
28  
29  
30  
31  
32  
33  
34  
35  
36  
37  
38  
39  
40  
41  
42  
43  
44  
45  
46  
47  
48  
49  
50  
51  
52  
53  
54  
55  
56  
57  
58  
59  
60

## References

1. Statistics Canada. Census of Canada 2011 [Available from: <http://www12.statcan.gc.ca/census-recensement/index-eng.cfm> accessed August 31st, 2014.
2. Andrade LH, Alonso J, Mneimneh Z, et al. Barriers to mental health treatment: results from the WHO World Mental Health surveys. *Psychological medicine* 2014;44(6):1303-17. doi: 10.1017/s0033291713001943 [published Online First: 2013/08/13]
3. Kessler RC, Berglund P, Demler O, et al. Lifetime prevalence and age-of-onset distributions of DSM-IV disorders in the National Comorbidity Survey Replication. *Archives of general psychiatry* 2005;62(6):593-602. doi: 10.1001/archpsyc.62.6.593 [published Online First: 2005/06/09]
4. Mental Health Commission of Canada. Making the Case for Investing in Mental Health in Canada, 2013.
5. McDonald KC, Bulloch AG, Duffy A, et al. Prevalence of Bipolar I and II Disorder in Canada. *Canadian journal of psychiatry Revue canadienne de psychiatrie* 2015;60(3):151-6. [published Online First: 2015/04/18]
6. Kidd SA, McKenzie KJ, Virdee G. Mental health reform at a systems level: wideing the lens on recovery-orientated care. *Canadian Journal of Psychiatry - Revue Canadienne de Psychiatrie* 2014;59(5):243-49.
7. Jones PB. Adult mental health disorders and their age at onset. *The British journal of psychiatry Supplement* 2013;54:s5-10. doi: 10.1192/bjp.bp.112.119164 [published Online First: 2013/01/11]
8. Viner RM, Ozer EM, Denny S, et al. Adolescence and the social determinants of health. *Lancet* 2012;379(9826):1641-52. doi: 10.1016/s0140-6736(12)60149-4 [published Online First: 2012/04/28]
9. Slade M, Amering M, Farkas M, et al. Uses and abuses of recovery: implementing recovery-oriented practices in mental health systems. *World psychiatry : official journal of the World Psychiatric Association (WPA)* 2014;13(1):1-12.
10. McFarlane WR, Levin B, Travis L, et al. Clinical and Functional Outcomes After 2 Years in the Early Detection and Intervention for the Prevention of Psychosis Multisite Effectiveness Trial. *Schizophrenia bulletin* 2014 doi: 10.1093/schbul/sbu108 [published Online First: 2014/07/30]
11. Ellison ML, Klodnick VV, Bond GR, et al. Adapting Supported Employment for Emerging Adults with Serious Mental Health Conditions. *The journal of behavioral health services & research* 2014 doi: 10.1007/s11414-014-9445-4 [published Online First: 2014/11/14]
12. Hetrick SE, Bailey AP, Smith KE, et al. Integrated (one-stop shop) youth health care: best available evidence and future directions. *The Medical journal of Australia* 2017;207(10):S5-s18. [published Online First: 2017/11/14]
13. Bond GR, Drake RE. Making the case for IPS supported employment. *Administration and policy in mental health* 2014;41(1):69-73. doi: 10.1007/s10488-012-0444-6 [published Online First: 2012/11/20]
14. Hoffmann H, Jackel D, Glauser S, et al. Long-term effectiveness of supported employment: 5-year follow-up of a randomized controlled trial. *Am J Psychiatry* 2014;171(11):1183-90. doi: 10.1176/appi.ajp.2014.13070857 [published Online First: 2014/08/16]

15. Brimblecombe N, Knapp M, Murguia S, et al. The role of youth mental health services in the treatment of young people with serious mental illness: 2-year outcomes and economic implications. *Early intervention in psychiatry* 2017;11(5):393-400. doi: 10.1111/eip.12261 [published Online First: 2015/09/04]
16. Fusar-Poli P, McGorry PD, Kane JM. Improving outcomes of first-episode psychosis: an overview. *World psychiatry : official journal of the World Psychiatric Association (WPA)* 2017;16(3):251-65. doi: 10.1002/wps.20446 [published Online First: 2017/09/25]
17. Kozloff N, Stergiopoulos V, Adair CE, et al. The Unique Needs of Homeless Youths With Mental Illness: Baseline Findings From a Housing First Trial. *Psychiatric services (Washington, DC)* 2016:appips201500461. doi: 10.1176/appi.ps.201500461 [published Online First: 2016/06/02]
18. Mokdad AH, Forouzanfar MH, Daoud F, et al. Global burden of diseases, injuries, and risk factors for young people's health during 1990-2013: a systematic analysis for the Global Burden of Disease Study 2013. *Lancet* 2016;387(10036):2383-401. doi: 10.1016/s0140-6736(16)00648-6 [published Online First: 2016/05/14]
19. Kalinyak CM, Gary FA, Killion CM, et al. The Transition to Independence Process: Promoting Self-Efficacy in Transition-Aged Youths. *Journal of psychosocial nursing and mental health services* 2016;54(2):49-53. doi: 10.3928/02793695-20160119-06 [published Online First: 2016/09/21]
20. Stergiopoulos V, Gozdzik A, O'Campo P, et al. Housing First: exploring participants' early support needs. *BMC health services research* 2014;14:167. doi: 10.1186/1472-6963-14-167 [published Online First: 2014/04/15]
21. Patton GC, Sawyer SM, Santelli JS, et al. Our future: a Lancet commission on adolescent health and wellbeing. *Lancet* 2016;387(10036):2423-78. doi: 10.1016/s0140-6736(16)00579-1 [published Online First: 2016/05/14]
22. Anthony WA. Recovery from mental illness: the guiding vision of the mental health service system in the 1990's. *Psychosocial Rehabilitation Journal* 1993;16(4):11-23.
23. Slade M. Routine outcome assessment in mental health services. *Psychological medicine* 2002;32:1339-43.
24. Tse S, Tsoi EW, Hamilton B, et al. Uses of strength-based interventions for people with serious mental illness: A critical review. *The International journal of social psychiatry* 2016 doi: 10.1177/0020764015623970 [published Online First: 2016/02/03]
25. Naslund JA, Aschbrenner KA, Marsch LA, et al. The future of mental health care: peer-to-peer support and social media. *Epidemiology and psychiatric sciences* 2016;25(2):113-22. doi: 10.1017/s2045796015001067 [published Online First: 2016/01/09]
26. Bond GR, Drake RE, Campbell K. Effectiveness of individual placement and support supported employment for young adults. *Early intervention in psychiatry* 2014 doi: 10.1111/eip.12175 [published Online First: 2014/08/21]
27. Bassett J, Lloyd C, Bassett H. Work issues for young people with psychosis: Barriers to employment. *British Journal of Occupational Therapy* 2001;64:66-72. doi: 10.1177/030802260106400203
28. Latimer EA, Bond GR, Drake RE. Economic approaches to improving access to evidence-based and recovery-oriented services for people with severe mental illness. *Canadian journal of psychiatry Revue canadienne de psychiatrie* 2011;56(9):523-9. doi: 10.1177/070674371105600903 [published Online First: 2011/10/01]



- 1
- 2
- 3
- 4 29. Krueger JI, Vohs KD, Baumeister RF. Is the allure of self-esteem a mirage after all? *The*
- 5 *American psychologist* 2008;63(1):64-5; discussion 65-6. doi: 10.1037/0003-
- 6 066x.63.1.64 [published Online First: 2008/01/16]
- 7
- 8 30. Orth U, Robins RW, Roberts BW. Low self-esteem prospectively predicts depression in
- 9 adolescence and young adulthood. *Journal of personality and social psychology*
- 10 2008;95(3):695-708. doi: 10.1037/0022-3514.95.3.695 [published Online First:
- 11 2008/08/30]
- 12
- 13 31. Ellison ML, Danley KS, Bromberg C, et al. Longitudinal outcome of young adults who
- 14 participated in a psychiatric vocational rehabilitation program. *Psychiatric rehabilitation*
- 15 *journal* 1999;22(4):337-41.
- 16
- 17 32. Guada J, Conrad T, Mares A. The aftercare support program: an emerging group intervention
- 18 for transition-aged youth. *Social Work with Groups* 2012;35(2):164-78.
- 19
- 20 33. Stone RA, Delman J, McKay CE, et al. Appealing Features of Vocational Support Services
- 21 for Hispanic and non-Hispanic Transition Age Youth and Young Adults with Serious
- 22 Mental Health Conditions. *The journal of behavioral health services & research*
- 23 2015;42(4):452-65. doi: 10.1007/s11414-014-9402-2 [published Online First:
- 24 2014/03/22]
- 25
- 26 34. Waghorn G, Hielscher E. The availability of evidence-based practices in supported
- 27 employment for Australians with severe and persistent mental illness. *Australian*
- 28 *occupational therapy journal* 2015;62(2):141-4. doi: 10.1111/1440-1630.12162
- 29 [published Online First: 2014/10/22]
- 30
- 31 35. Harvey SB, Henderson M, Lelliott P, et al. Mental health and employment: much work still
- 32 to be done. *The British journal of psychiatry : the journal of mental science*
- 33 2009;194(3):201-3. doi: 10.1192/bjp.bp.108.055111 [published Online First: 2009/03/03]
- 34
- 35 36. Tindall RM, Simmons MB, Allott K, et al. Essential ingredients of engagement when
- 36 working alongside people after their first episode of psychosis: A qualitative meta-
- 37 synthesis. *Early intervention in psychiatry* 2018 doi: 10.1111/eip.12566 [published
- 38 Online First: 2018/04/07]
- 39
- 40 37. MacDonald K, Fainman-Adelman N, Anderson KK, et al. Pathways to mental health services
- 41 for young people: a systematic review. *Social psychiatry and psychiatric epidemiology*
- 42 2018 doi: 10.1007/s00127-018-1578-y [published Online First: 2018/08/24]
- 43
- 44 38. Santesteban-Echarri O, Paino M, Rice S, et al. Predictors of functional recovery in first-
- 45 episode psychosis: A systematic review and meta-analysis of longitudinal studies.
- 46 *Clinical psychology review* 2017;58:59-75. doi: 10.1016/j.cpr.2017.09.007 [published
- 47 Online First: 2017/10/19]
- 48
- 49 39. Silver Award: Providing Recovery-Oriented Early Intervention Services to Youths
- 50 Experiencing First-Episode Psychosis. *Psychiatric services (Washington, DC)*
- 51 2017;68(10):e7-e8. doi: 10.1176/appi.ps.681005 [published Online First: 2017/10/03]
- 52
- 53 40. Henderson JL, Cheung A, Cleverley K, et al. Integrated collaborative care teams to enhance
- 54 service delivery to youth with mental health and substance use challenges: protocol for a
- 55 pragmatic randomised controlled trial. *BMJ open* 2017;7(2):e014080. doi:
- 56 10.1136/bmjopen-2016-014080 [published Online First: 2017/02/09]
- 57
- 58 41. Burke-Miller J, Razzano LA, Grey DD, et al. Supported employment outcomes for transition
- 59 age youth and young adults. *Psychiatric rehabilitation journal* 2012;35(3):171-9. doi:
- 60 10.2975/35.3.2012.171.179 [published Online First: 2012/01/17]



42. Dudley R, Nicholson M, Stott P, et al. Improving vocational outcomes of service users in an Early Intervention in Psychosis service. *Early intervention in psychiatry* 2014;8(1):98-102. doi: 10.1111/eip.12043 [published Online First: 2013/03/16]
43. Baksheev GN, Allott K, Jackson HJ, et al. Predictors of vocational recovery among young people with first-episode psychosis: findings from a randomized controlled trial. *Psychiatric rehabilitation journal* 2012;35(6):421-7. doi: 10.1037/h0094574 [published Online First: 2013/01/02]
44. Ferguson KM. Using the Social Enterprise Intervention (SEI) and Individual Placement and Support (IPS) models to improve employment and clinical outcomes of homeless youth with mental illness. *Social work in mental health* 2013;11(5) doi: 10.1080/15332985.2013.764960 [published Online First: 2013/12/03]
45. Killackey E, Jackson HJ, McGorry PD. Vocational intervention in first-episode psychosis: individual placement and support v. treatment as usual. *The British journal of psychiatry : the journal of mental science* 2008;193(2):114-20. doi: 10.1192/bjp.bp.107.043109 [published Online First: 2008/08/02]
46. Porteous N, Waghorn G. Developing evidence-based supported employment services for young adults receiving public mental health services. *New Zealand Journal of Occupational Therapy* 2009;56(1):34-39.
47. Knapp M, Patel A, Curran C, et al. Supported employment: cost-effectiveness across six European sites. *World psychiatry : official journal of the World Psychiatric Association (WPA)* 2013;12(1):60-8. doi: 10.1002/wps.20017 [published Online First: 2013/03/09]
48. Arskey H, O'Malley L. Scoping studies: towards a methodological framework. *International Journal of Social Research Methodology: Theory and Practice* 2005;8(1):19-32.
49. Schuring M, Mackenbach J, Voorham T, et al. The effect of re-employment on perceived health. *Journal of Epidemiology & Community Health*;65(7):639-44.
50. Hill ML, Banks PD, Handrich RR, et al. Benefit-cost analysis of supported competitive employment for persons with mental retardation. *Research in developmental disabilities* 1987;8(1):71-89. [published Online First: 1987/01/01]
51. Shafer MS, Hill J, Seyfarth J, et al. Competitive employment and workers with mental retardation: analysis of employers' perceptions and experiences. *American journal of mental retardation : AJMR* 1987;92(3):304-11. [published Online First: 1987/11/01]
52. Rusch FR, Hughes C. Supported employment: promoting employee independence. *Mental retardation* 1988;26(6):351-5. [published Online First: 1988/12/01]
53. Wehman P, Kreutzer J, West M, et al. Employment outcomes of persons following traumatic brain injury: pre-injury, post-injury, and supported employment. *Brain injury* 1989;3(4):397-412. [published Online First: 1989/10/01]
54. Wacker DP, Fromm-Steege L, Berg WK, et al. Supported employment as an intervention package: a preliminary analysis of functional variables. *Journal of applied behavior analysis* 1989;22(4):429-39. doi: 10.1901/jaba.1989.22-429 [published Online First: 1989/01/01]
55. United Nations. Secretary-General's Report to the General Assembly A/36/215, 1981.
56. United Nations. Secretary-General's Report to the General Assembly, A/40/256, 1985 1985.
57. United Nations. General Assembly Resolution, A/RES/50/81. 1995
58. Ferguson KM, Xie B, Glynn S. Adapting the Individual Placement and Support Model with Homeless Young Adults. *Child & Youth Care Forum* 2012;41(3):277-94.

- 1
- 2
- 3
- 4 59. Rinaldi M, McNeil K, Firm M, et al. What are the benefits of evidence-based supported
- 5 employment for patients with first-episode psychosis? . 2004;28(8):281-84.
- 6 60. Waghorn G, Collister L, Killackey E, et al. Challenges to implementing evidence-based
- 7 supported employment in Australia. *Journal of Vocational Rehabilitation*. 2007;27(1):29-
- 8 37.
- 9 61. Tapfumaneyi A, Johnson S, Joyce J, et al. Predictors of vocational activity over the first year
- 10 in inner-city early intervention in psychosis services. *Early intervention in psychiatry*
- 11 2015;9(6):447-58. doi: 10.1111/eip.12125 [published Online First: 2014/02/20]
- 12 62. Bond GR, Drake RE, Luciano A. Employment and educational outcomes in early
- 13 intervention programmes for early psychosis: a systematic review. *Epidemiology and*
- 14 *psychiatric sciences* 2015;24(5):446-57. doi: 10.1017/s2045796014000419 [published
- 15 Online First: 2014/07/16]
- 16 63. Henderson JL, Hawke LD, Chaim G, et al. Not in employment, education or training: Mental
- 17 health, substance use, and disengagement in a multi-sectoral sample of service-seeking
- 18 Canadian youth. *Children and Youth Services Review* 2017;75:138-45.
- 19 64. Lindsay S. Discrimination and other barriers to employment for teens and young adults with
- 20 disabilities. *Disability and rehabilitation* 2011;33(15-16):1340-50. doi:
- 21 10.3109/09638288.2010.531372 [published Online First: 2010/11/12]
- 22 65. Labonte R, Thompson P. Heart health inequalities in Canada: modules, theory and planning.
- 23 *Health Promotion International* 1992;7(2):119-28.
- 24 66. Piat M, Sabetti J, Bloom D. The transformation of mental health services to a recovery-
- 25 orientated system of care: Canadian decision maker perspectives. *The International*
- 26 *journal of social psychiatry* 2010;56(2):168-77. doi: 10.1177/0020764008100801
- 27 [published Online First: 2010/03/09]
- 28 67. Vander Stoep A, Beresford SA, Weiss NS, et al. Community-based study of the transition to
- 29 adulthood for adolescents with psychiatric disorder. *American journal of epidemiology*
- 30 2000;152(4):352-62. [published Online First: 2000/09/01]
- 31 68. Gilmer TP, Ojeda VD, Leich J, et al. Assessing needs for mental health and other services
- 32 among transition-age youths, parents, and providers. *Psychiatric services (Washington,*
- 33 *DC)* 2012;63(4):338-42. doi: 10.1176/appi.ps.201000545 [published Online First:
- 34 2012/02/18]
- 35 69. Haber MG, Karpur A, Deschenes N, et al. Predicting improvement of transitioning young
- 36 people in the partnerships for youth transition initiative: findings from a multisite
- 37 demonstration. *The journal of behavioral health services & research* 2008;35(4):488-
- 38 513. doi: 10.1007/s11414-008-9126-2 [published Online First: 2008/07/19]
- 39 70. Lindsay S. Employment status and work characteristics among adolescents with disabilities.
- 40 *Disability and rehabilitation* 2011;33(10):843-54. doi: 10.3109/09638288.2010.514018
- 41 [published Online First: 2010/09/02]
- 42 71. Veldman K, Reijneveld SA, Ortiz JA, et al. Mental health trajectories from childhood to
- 43 young adulthood affect the educational and employment status of young adults: results
- 44 from the TRAILS study. *Journal of epidemiology and community health* 2015;69(6):588-
- 45 93. doi: 10.1136/jech-2014-204421 [published Online First: 2015/02/11]
- 46 72. Noel VA, Oulvey E, Drake RE, et al. Barriers to Employment for Transition-age Youth with
- 47 Developmental and Psychiatric Disabilities. *Administration and policy in mental health*
- 48 2017;44(3):354-58. doi: 10.1007/s10488-016-0773-y [published Online First:
- 49 2016/11/05]
- 50
- 51
- 52
- 53
- 54
- 55
- 56
- 57
- 58
- 59
- 60

- 1  
2  
3 73. Luciano A, Meara E. Employment status of people with mental illness: national survey data  
4 from 2009 and 2010. *Psychiatric services (Washington, DC)* 2014;65(10):1201-9. doi:  
5 10.1176/appi.ps.201300335 [published Online First: 2014/06/17]  
6  
7 74. Luciano A, Bond GR, Drake RE. Does employment alter the course and outcome of  
8 schizophrenia and other severe mental illnesses? A systematic review of longitudinal  
9 research. *Schizophrenia research* 2014;159(2-3):312-21. doi:  
10 10.1016/j.schres.2014.09.010 [published Online First: 2014/10/04]  
11  
12 75. Nochajski SM, Schweitzer JA. Promoting school to work transition for students with  
13 emotional/behavioral disorders. *Work (Reading, Mass)* 2014;48(3):413-22. doi:  
14 10.3233/wor-131790 [published Online First: 2013/11/29]  
15  
16 76. Meeting the needs of young people. *IPPF medical bulletin* 1984;18(2):1-4. [published Online  
17 First: 1984/04/01]  
18  
19 77. Ellison ML, Klodnick VV, Bond GR, et al. Adapting supported employment for emerging  
20 adults with serious mental health conditions. *The journal of behavioral health services &*  
21 *research* 2015;42(2):206-22. doi: 10.1007/s11414-014-9445-4 [published Online First:  
22 2014/11/14]  
23  
24 78. Ferguson KM, Horwood W. Using the Social Enterprise Intervention (SEI) and Individual  
25 Placement and Support (IPS) Models to Improve Employment and Clinical Outcomes of  
26 Homeless Youth with Mental Illness. *Social Work in Mental Health. Social work in*  
27 *mental health* 2013;11(5):473-95.  
28  
29 79. Killackey E, Allott K, Cotton SM, et al. A randomized controlled trial of vocational  
30 intervention for young people with first-episode psychosis: method. *Early intervention in*  
31 *psychiatry* 2013;7(3):329-37. doi: 10.1111/eip.12066 [published Online First:  
32 2013/07/16]  
33  
34 80. Killackey E, Waghorn G. The challenge of integrating employment services with public  
35 mental health services in Australia: progress at the first demonstration site. *Psychiatric*  
36 *rehabilitation journal* 2008;32(1):63-6. doi: 10.2975/32.1.2008.63.66 [published Online  
37 First: 2008/07/11]  
38  
39 81. Mueser KT, Cook JA. Why can't we fund supported employment? *Psychiatric rehabilitation*  
40 *journal* 2016;39(2):85-9. doi: 10.1037/prj0000203 [published Online First: 2016/06/10]  
41  
42 82. Mueser KT, Drake RE, Bond GR. Recent advances in supported employment for people with  
43 serious mental illness. *Curr Opin Psychiatry* 2016;29(3):196-201. doi:  
44 10.1097/ycp.0000000000000247 [published Online First: 2016/03/31]  
45  
46 83. Cheungpasitporn W, Horne JM, Howarth CB. Adrenocortical carcinoma presenting as  
47 varicocele and renal vein thrombosis: A case report. *Journal of Medical Case Reports*  
48 2011;5(337) doi: <http://dx.doi.org/10.1186/1752-1947-5-337>  
49  
50 84. Rinaldi M, Perkins R, McNeil K, et al. The Individual Placement and Support approach to  
51 vocational rehabilitation for young people with first episode psychosis in the UK. *Journal*  
52 *of mental health (Abingdon, England)* 2010;19(6):483-91. doi:  
53 10.3109/09638230903531100 [published Online First: 2010/12/03]  
54  
55 85. Brady WJ, Ferguson JD, Ullman EA, et al. Myocarditis: emergency department recognition  
56 and management. *Emergency Medicine Clinics of North America* 2004;22(4):865-85.  
57  
58 86. Tandon SD, Latimore AD, Clay E, et al. Depression outcomes associated with an  
59 intervention implemented in employment training programs for low-income adolescents  
60 and young adults. *JAMA psychiatry* 2015;72(1):31-9. doi:  
10.1001/jamapsychiatry.2014.2022 [published Online First: 2014/11/13]

- 1  
2  
3 87. Canadian Institutes for Health Research. Strategy for Patient-Oriented Research 2016  
4 [Available from: <http://www.cihr-irsc.gc.ca/e/41204.html> accessed September 6th 2016.  
5  
6 88. Canadian Institutes for Health Research. Canada's Strategy for Patient-Oriented Research -  
7 Patient Engagement Framework 2015  
8 89. Frank L, Basch E, Selby JV. The PCORI perspective on patient-centered outcomes research.  
9 *Jama* 2014;312(15):1513-4. doi: 10.1001/jama.2014.11100 [published Online First:  
10 2014/08/29]  
11 90. Selby JV, Forsythe L, Sox HC. Stakeholder-Driven Comparative Effectiveness Research: An  
12 Update From PCORI. *Jama* 2015;314(21):2235-6. doi: 10.1001/jama.2015.15139  
13 [published Online First: 2015/11/26]  
14  
15  
16  
17  
18  
19  
20  
21  
22  
23  
24  
25  
26  
27  
28  
29  
30  
31  
32  
33  
34  
35  
36  
37  
38  
39  
40  
41  
42  
43  
44  
45  
46  
47  
48  
49  
50  
51  
52  
53  
54  
55  
56  
57  
58  
59  
60

**Table 1:** Search strategy terms used for each data based searched

| Database(s)                             | Mental Health search terms                                                                                                                                                                                                                                                                                                                                                                                                                                                                                                                                                                                                                                                                                                                                                                                                                                                                                                                                                                                                                                             | Boolean | Employment search terms                                                                                                                                                                                                                                                                                                                                                                 |
|-----------------------------------------|------------------------------------------------------------------------------------------------------------------------------------------------------------------------------------------------------------------------------------------------------------------------------------------------------------------------------------------------------------------------------------------------------------------------------------------------------------------------------------------------------------------------------------------------------------------------------------------------------------------------------------------------------------------------------------------------------------------------------------------------------------------------------------------------------------------------------------------------------------------------------------------------------------------------------------------------------------------------------------------------------------------------------------------------------------------------|---------|-----------------------------------------------------------------------------------------------------------------------------------------------------------------------------------------------------------------------------------------------------------------------------------------------------------------------------------------------------------------------------------------|
| <b>Medline</b>                          | <ol style="list-style-type: none"> <li>exp mental disorders or exp anxiety disorders or exp bipolar or exp dissociative disorders or multiple personality disorder or exp mood disorders or exp personality disorders or exp schizophrenia or psychotic disorders</li> </ol> <p>OR</p> <ol style="list-style-type: none"> <li>Mental Disorder* or Adjustment Disorder* or Mental illness or Affective Disorders or Depression or Dysthymic Disorder* or Anxiety Disorder* or Post Traumatic Stress Disorder or PTSD or Dissociative Disorder* or Multiple-Personality Disorder or Delusion* or Personality Disorder* or Psychotic Disorder* or Affective Disorder* or Bipolar Disorder* or Cyclothymic Disorder or Schizoaffective Disorder* or Paranoid Disorder* or Schizophrenia or Mood disorder*</li> </ol>                                                                                                                                                                                                                                                       | AND     | <ol style="list-style-type: none"> <li>employment/ or employment, supported/ or return to work/ or unemployment/ or workplace</li> </ol> <p>OR</p> <ol style="list-style-type: none"> <li>((work or job) adj3 (site or place or location)) or worksite or workplace or job or work or employ*)</li> </ol>                                                                               |
| <b>CINAHL &amp; Psycinfo</b>            | <ol style="list-style-type: none"> <li>Mental Disorders OR Adjustment Disorders OR Mental Disorders, Chronic OR Affective Disorders OR Depression OR Dysthymic Disorder OR Anxiety Disorders OR Post Traumatic Stress Disorder OR Dissociative Disorder OR Multiple-Personality Disorder OR Organic Mental Disorders OR Delusions OR Personality Disorders OR Psychotic Disorders OR Affective Disorders OR Bipolar Disorder OR Cyclothymic Disorder OR Schizoaffective Disorder OR Paranoid Disorders OR Schizophrenia</li> </ol> <p>OR</p> <ol style="list-style-type: none"> <li>Mental Disorder* OR Adjustment Disorder* OR Mental illness OR Affective Disorders OR Depression OR Dysthymic Disorder* OR Anxiety Disorder* OR Post Traumatic Stress Disorder OR PTSD OR Dissociative Disorder* OR Multiple-Personality Disorder OR Delusion* OR Personality Disorder* OR Psychotic Disorder* OR Affective Disorder* OR Bipolar Disorder* OR Cyclothymic Disorder OR Schizoaffective Disorder* OR Paranoid Disorder* OR Schizophrenia OR Mood disorder*</li> </ol> | AND     | <ol style="list-style-type: none"> <li>worksite or workplace or ((work or job) n3 (site or place or location)) or job or work or employ*</li> </ol> <p>OR</p> <ol style="list-style-type: none"> <li>Employment OR Part Time Employment OR Temporary Employment OR Employment Status OR Unemployment</li> </ol> <p>OR</p> <ol style="list-style-type: none"> <li>(MH "Work")</li> </ol> |
| <b>Cochrane Review &amp; ABI/Inform</b> | <ol style="list-style-type: none"> <li>Mental Disorder* or Adjustment Disorder* or Mental illness or Affective Disorders or Depression or Dysthymic Disorder* or</li> </ol>                                                                                                                                                                                                                                                                                                                                                                                                                                                                                                                                                                                                                                                                                                                                                                                                                                                                                            | AND     | <ol style="list-style-type: none"> <li>employment or return to work or unemployment or</li> </ol>                                                                                                                                                                                                                                                                                       |

1  
2  
3  
4  
5  
6  
7  
8  
9  
10  
11  
12  
13  
14  
15  
16  
17  
18  
19  
20  
21  
22  
23  
24  
25  
26  
27  
28  
29  
30  
31  
32  
33  
34  
35  
36  
37  
38  
39  
40  
41  
42  
43  
44  
45  
46  
47  
48  
49  
50  
51  
52  
53  
54  
55  
56  
57  
58  
59  
60

|  |                                                                                                                                                                                                                                                                                                                             |  |                  |
|--|-----------------------------------------------------------------------------------------------------------------------------------------------------------------------------------------------------------------------------------------------------------------------------------------------------------------------------|--|------------------|
|  | Anxiety Disorder* or Post Traumatic Stress Disorder or PTSD or Dissociative Disorder* or Multiple-Personality Disorder or Delusion* or Personality Disorder* or Psychotic Disorder* or Affective Disorder* or Bipolar Disorder* or Cyclothymic Disorder or Schizoaffective Disorder* or Paranoid Disorder* or Schizophrenia |  | workplace or job |
|--|-----------------------------------------------------------------------------------------------------------------------------------------------------------------------------------------------------------------------------------------------------------------------------------------------------------------------------|--|------------------|

For peer review only



Table 2: Details of included articles (n=24) including stud origin, findings, barriers, facilitators, and limitations

| Study Information                               | Country | Population                                                                         | Type of Study and Intervention (If applicable)                                                                                                                                                                                | Summary of Results                                                                                                                                                                                                                                                                                                                                                                                                                                                                                                                                                                                                                                | Facilitators to Employment                                                                                                                                                                                                                        | Barriers to Employment                                   | Study Limitations                                   |
|-------------------------------------------------|---------|------------------------------------------------------------------------------------|-------------------------------------------------------------------------------------------------------------------------------------------------------------------------------------------------------------------------------|---------------------------------------------------------------------------------------------------------------------------------------------------------------------------------------------------------------------------------------------------------------------------------------------------------------------------------------------------------------------------------------------------------------------------------------------------------------------------------------------------------------------------------------------------------------------------------------------------------------------------------------------------|---------------------------------------------------------------------------------------------------------------------------------------------------------------------------------------------------------------------------------------------------|----------------------------------------------------------|-----------------------------------------------------|
| Baksheev et al. <sup>43</sup><br><br>Date: 2012 | AUS     | Age: 15-24<br>Mean age: 21.4 years<br><br>N: 41<br><br>Dx: First episode psychosis | Randomized control study.<br><br>Intervention: Compared Individual placement and support (IPS) plus treatment, with just treatment on its own.<br><br>There was a 6-month intervention period and a 6-month follow-up period. | Intervention group were 14.17 times more likely to have worked or studied during the 6-month <i>assessment</i> period compared to the control group.<br><br>Intervention group were 16.26 times more likely to obtain work or study during the 6-month <i>follow up</i> period<br><br>Baseline factors that were found to be <i>not significant</i> in determining if a participant would have found work or studied in the 6-month follow up period included:<br>- gender<br>- being occupied at baseline<br>- whether participants were receiving government benefits<br>- educated beyond secondary level<br>- duration of untreated psychosis | The main facilitator to employment was having participated in the IPS program and not only the intervention as usual.<br><br>Clinicians should not exclude any client based on 'work readiness', current symptoms, or any other personal factors. | No barriers to employment were identified in this paper. | Short follow up (6 months)<br><br>Small sample size |
| J. Bassett<br>Lloyd<br>H. Bassett <sup>27</sup> | AUS     | Age: 18-28<br><br>N: 10                                                            | Qualitative Study<br>Intervention:<br>Focus groups on                                                                                                                                                                         | Themes of focus groups:<br>- Loss<br>-Stigma                                                                                                                                                                                                                                                                                                                                                                                                                                                                                                                                                                                                      | Programs aimed to assist in the development of time                                                                                                                                                                                               | Low self-esteem<br><br>Low self- worth                   | Small sample size                                   |

| Study Information                                      | Country | Population                                                                              | Type of Study and Intervention (If applicable)                                         | Summary of Results                                                                                                                                                                                                                                                                       | Facilitators to Employment                                                                                                                                        | Barriers to Employment                                                                                                 | Study Limitations                                                                                    |
|--------------------------------------------------------|---------|-----------------------------------------------------------------------------------------|----------------------------------------------------------------------------------------|------------------------------------------------------------------------------------------------------------------------------------------------------------------------------------------------------------------------------------------------------------------------------------------|-------------------------------------------------------------------------------------------------------------------------------------------------------------------|------------------------------------------------------------------------------------------------------------------------|------------------------------------------------------------------------------------------------------|
| <b>Date:</b> 2001                                      |         | <b>Dx:</b><br>Psychotic disorder                                                        | participants' perceived barriers to employment                                         | -Treatment issues<br>-Symptom management<br>-Life goals<br>-Need for support                                                                                                                                                                                                             | management, stress management, self-confidence, and problem-solving skills<br><br>Skills at how to manage the lifestyle change from not working to being employed | Negative effects of medication (low motivation & tiredness)<br><br>Lack of strategies to manage conflict / frustration | Only male participants included in this study<br><br>Participants were only from one health district |
| Bond et al. <sup>62</sup><br><b>Date:</b> 2015         | USA     | N/A                                                                                     | Systematic review of employment and education outcomes in early intervention programs. | Incorporating well-defined evidence-based supported employment services into comprehensive early intervention programs for patients in early psychosis significantly increases employment rates but does not improve educational outcomes compared with programs lacking these services. | Early intervention<br><br>Integrated employment services with early intervention services.                                                                        | Not specified                                                                                                          | Review did not meet the full standards of a PRISMA review                                            |
| Brimblecombe et al. <sup>15</sup><br><b>Date:</b> 2017 | UK      | <b>Age:</b> 18-27<br><b>N:</b> 20<br><b>Dx:</b> General mental health disorder          | Pre-post comparative treatment design                                                  | Employment rates improved, although the sample size for this is very small<br><br>Cost effective intervention                                                                                                                                                                            | Early intervention<br><br>Youth-specific mental health services                                                                                                   | Unmet mental health needs<br><br>Lack of integration of services                                                       | Small sample size<br><br>Lack of control group                                                       |
| Burke-Miller et al. <sup>41</sup><br><b>Date:</b> 2012 | USA     | <b>Age:</b> 18-30<br>*divided into 3 groups: youth (18-24), young adults (25-30), older | Multi-site randomized control trial<br><br>Examined if participants had any kind of    | Youth (after intervention):<br>- any work: 69%<br>Competitive employment: 50%<br>- vocational hours received: 53                                                                                                                                                                         | High future work expectations<br><br>Greater hours of supported employment services<br>- work history                                                             | Heavy emphasis on job retention for youth                                                                              | Small sample size in the 'youth' category                                                            |



| Study Information                                                   | Country | Population                                                | Type of Study and Intervention (If applicable)                                                                                                                                                                                     | Summary of Results                                                                                                                                                                                        | Facilitators to Employment                                                                                                                                                                                                                                    | Barriers to Employment                           | Study Limitations                                                                                                           |
|---------------------------------------------------------------------|---------|-----------------------------------------------------------|------------------------------------------------------------------------------------------------------------------------------------------------------------------------------------------------------------------------------------|-----------------------------------------------------------------------------------------------------------------------------------------------------------------------------------------------------------|---------------------------------------------------------------------------------------------------------------------------------------------------------------------------------------------------------------------------------------------------------------|--------------------------------------------------|-----------------------------------------------------------------------------------------------------------------------------|
|                                                                     |         | adult (31+)<br>N= 1272<br><b>Dx:</b> Any mental health dx | work, and if they were employed in a competitive job*<br>*Definition of competitive job: pays minimum wage or higher, located in a mainstream/integrated setting, is not set aside for mental health consumers, is consumer owned. | Young adults<br>- any work 73%<br>- competitive employment: 56%<br>- vocational hours received: 56<br>Older adult:<br>- any work: 58%<br>- competitive employment: 42%<br>- vocational hours received: 60 | Positive work history (better able to provide references)<br>Recovery focused<br>Younger age<br>Increased access to benefits counselling (for welfare)                                                                                                        |                                                  |                                                                                                                             |
| Dudley Nicholson<br>Stott Spoons <sup>42</sup><br><b>Date:</b> 2014 | USA     | <b>Age:</b> 14-35<br><b>N:</b> 30<br><b>Dx:</b> Psychosis | Naturalistic comparison of 2 studies<br>Intervention: Individual Placement Support (IPS) model + vocational worker                                                                                                                 | Improve the engagement in meaningful education, training or employment for young people with psychosis                                                                                                    | IPS<br>Younger age<br>Small caseload size for vocational therapist<br>Funding for vocational specialist<br>Zero exclusion policy for clients<br>Diversity of jobs developed<br>Jobs as transitions (positive experiences on the path of vocational growth and | Psychiatric illness<br>Lack of follow-up support | The findings rest on the assumption that the only difference between the services was the presence of the vocational worker |

1  
2  
3  
4  
5  
6  
7  
8  
9  
10  
11  
12  
13  
14  
15  
16  
17  
18  
19  
20  
21  
22  
23  
24  
25  
26  
27  
28  
29  
30  
31  
32  
33  
34  
35  
36  
37  
38  
39  
40  
41  
42  
43  
44  
45  
46  
47

| Study Information                                           | Country    | Population                                                                                  | Type of Study and Intervention (If applicable)                                                                                                                                        | Summary of Results                                                                                                                                                                                                                                                                                                                                                                                                                                                                                           | Facilitators to Employment                                                                                                                                                                               | Barriers to Employment           | Study Limitations                                                                                                 |
|-------------------------------------------------------------|------------|---------------------------------------------------------------------------------------------|---------------------------------------------------------------------------------------------------------------------------------------------------------------------------------------|--------------------------------------------------------------------------------------------------------------------------------------------------------------------------------------------------------------------------------------------------------------------------------------------------------------------------------------------------------------------------------------------------------------------------------------------------------------------------------------------------------------|----------------------------------------------------------------------------------------------------------------------------------------------------------------------------------------------------------|----------------------------------|-------------------------------------------------------------------------------------------------------------------|
|                                                             |            |                                                                                             |                                                                                                                                                                                       |                                                                                                                                                                                                                                                                                                                                                                                                                                                                                                              | <p>development)</p> <p>Follow-along supports (provided to employer and client on a time-unlimited basis)</p> <p>Rapid job searches (within 4 weeks)</p> <p>Ongoing work-based vocational assessments</p> |                                  |                                                                                                                   |
| <p>Ellison et al.<sup>77</sup></p> <p><b>Date:</b> 1999</p> | <p>USA</p> | <p><b>Age:</b> 18-35</p> <p><b>N</b> = 36</p> <p><b>Dx:</b> Any mental health diagnosis</p> | <p>Longitudinal study comparing original intervention group and the same participants at 5 years' follow-up</p> <p>*follow-up from Danley, Sciarappa &amp; MacDonald-Wilson, 1992</p> | <p>Data from 2 groups (original career education group, and follow-up group) were examined</p> <p>The main significant differences were found between baseline (prior to original intervention) results and the follow-up five years later.</p> <p>Near significant decrease in proportion of participants currently in school or a training program</p> <p>Findings indicate that positive results seen at the end of the original intervention period were maintained for the 5 years since that time.</p> | <p>Higher work satisfaction</p>                                                                                                                                                                          | <p>Decreased quality of life</p> | <p>No control group</p> <p>Not all original participants were located, therefore their data were not included</p> |

| Study Information                                      | Country | Population                                                                                                              | Type of Study and Intervention (If applicable)                                                                                                                                           | Summary of Results                                                                                                                                                                                                                                                                                        | Facilitators to Employment                                                                                                                                                                               | Barriers to Employment                                                                                                                                                      | Study Limitations                                                                                      |
|--------------------------------------------------------|---------|-------------------------------------------------------------------------------------------------------------------------|------------------------------------------------------------------------------------------------------------------------------------------------------------------------------------------|-----------------------------------------------------------------------------------------------------------------------------------------------------------------------------------------------------------------------------------------------------------------------------------------------------------|----------------------------------------------------------------------------------------------------------------------------------------------------------------------------------------------------------|-----------------------------------------------------------------------------------------------------------------------------------------------------------------------------|--------------------------------------------------------------------------------------------------------|
| Ferguson <sup>78</sup><br><br><b>Date:</b> 2013        | USA     | <b>Age:</b> 18-24<br>Mean age: 21<br><br><b>N:</b> 28<br><br><b>Dx:</b> Homeless youth with any mental health diagnosis | Randomized Control Trial (RCT)<br><br>Intervention: Supported employment with 4 components:<br>1) Vocational skills<br>2) Small business skills<br>3) Social skills<br>Clinical services | The study described a methodology for establishing a university-agency research partnership to design, implement, evaluate, and replicate evidence-informed and evidence-based interventions with homeless youth with mental illness to enhance their employment, mental health, and functional outcomes. | Vocational + clinical service integration<br><br>Structuring participant time<br><br>Social contact<br><br>Social identity<br><br>Zero exclusion from program<br><br>Rapid job search<br><br>Younger age | No barriers addressed in study                                                                                                                                              | Majority of participants were male<br><br>Small sample size                                            |
| Ferguson et al. <sup>58</sup><br><br><b>Date:</b> 2012 | USA     | <b>Age:</b> 18-24<br><br><b>N:</b> 20<br><br><b>Dx:</b> Homeless youth with any mental health diagnosis                 | Pre-Post Quasi-experiment<br><br>Intervention: Adapted IPS model targeted at low-income youth                                                                                            | The study sought to adapt an evidence-based intervention for homeless young adults with mental illness.<br><br>At follow-up, the IPS group were 7.83 times more likely of working than the control group<br>The IPS group worked 5.20 months compared to the control group at 2.19 months                 | IPS intervention<br><br>Less “severe” mental health dx<br><br>Younger age                                                                                                                                | Living on the streets<br><br>Criminal activity<br><br>Drug use<br><br>The need to maintain personal hygiene<br><br>Securing transportation<br><br>Having enough food to eat | Majority of the participants were male<br><br>Small sample size<br><br>Non-random assignment to groups |
| Gilmer et al. <sup>68</sup><br><br><b>Date:</b> 2012   | USA     | <b>Age:</b> 18-24<br><br><b>N:</b> 74<br><br><b>Dx:</b> Any mental health                                               | Qualitative Study<br><br>Intervention: Integrating employment services into                                                                                                              | The study assessed the needs for mental health services for transition-age youths at youth-specific programs                                                                                                                                                                                              | Services that foster a transition to independence<br><br>Age-specific housing                                                                                                                            | Inconvenient scheduling<br><br>Weak patient -provider relationship<br><br>Limited program funding                                                                           | Sampling bias of transition-aged youth                                                                 |

| Study Information                                        | Country | Population                                                                                                      | Type of Study and Intervention (If applicable) | Summary of Results                                                                                                                                                                                                                                         | Facilitators to Employment                                                                                                             | Barriers to Employment                                                                                                                                            | Study Limitations                                                                         |
|----------------------------------------------------------|---------|-----------------------------------------------------------------------------------------------------------------|------------------------------------------------|------------------------------------------------------------------------------------------------------------------------------------------------------------------------------------------------------------------------------------------------------------|----------------------------------------------------------------------------------------------------------------------------------------|-------------------------------------------------------------------------------------------------------------------------------------------------------------------|-------------------------------------------------------------------------------------------|
|                                                          |         | diagnosis                                                                                                       | mental health services                         |                                                                                                                                                                                                                                                            |                                                                                                                                        | Lack of mentorship from peers experiencing similar struggles<br><br>Need for holistic approach to recovery                                                        |                                                                                           |
| Haber et al. <sup>69</sup><br><br><b>Date:</b> 2008      | USA     | <b>Mean age:</b> 17<br><br>N= 562<br><br><b>Dx:</b> Any mental health dx                                        | Descriptive                                    | The most consistent improvement was shown on the indicators of educational advancement and employment progress<br><br>There was a post hoc improvement on employment/educational advancement.<br><br>Productivity, education, and employment all increased | Education for younger participants<br><br>Longer period of support for employment and education related goals for younger participants | Advanced age (within the youth population)                                                                                                                        | Lack of uniform data across sites on program characteristics<br><br>Lack of control group |
| Henderson, et al. <sup>63</sup><br><br><b>Date:</b> 2017 | CAN     | <b>Age range:</b> 12-24<br><br>N= 690<br><br><b>Dx:</b> Youth not in employment or in education training (NEET) | Cross-sectional                                | NEET youth showed multiple psychosocial risk factors. They were also more likely to endorse substance use and crime/violence concerns than their non-NEET service-seeking counterparts. Gender-based differences were observed.                            | Integrated services<br><br>Working with schools<br>Working with employers to increase internship opportunities.                        | Substance Dependence<br>History of crime/violence<br><br>High level of need related to internalizing and externalizing behaviors.<br><br>Gender based differences | Participants not asked how long they were NEET.<br><br>Study cross-sectional in nature.   |
| Killackey, Jackson, McGorry <sup>80</sup>                | AUS     | <b>Age range:</b> 15-25                                                                                         | Non-randomized control trial                   | 65% of intervention group found employment compared with 9% of                                                                                                                                                                                             | Participation in a vocational intervention for young people                                                                            | Little or no work history can be a barrier to longer term employment                                                                                              | Small sample size                                                                         |

| Study Information                                     | Country    | Population                                                                                   | Type of Study and Intervention (If applicable)    | Summary of Results                                                                                                                                                                                                                                               | Facilitators to Employment                                                                                | Barriers to Employment                                                                                                                                                                                                                                                                                                                                                             | Study Limitations                                                                                                                                |
|-------------------------------------------------------|------------|----------------------------------------------------------------------------------------------|---------------------------------------------------|------------------------------------------------------------------------------------------------------------------------------------------------------------------------------------------------------------------------------------------------------------------|-----------------------------------------------------------------------------------------------------------|------------------------------------------------------------------------------------------------------------------------------------------------------------------------------------------------------------------------------------------------------------------------------------------------------------------------------------------------------------------------------------|--------------------------------------------------------------------------------------------------------------------------------------------------|
| <p><b>Date:</b> 2008</p>                              |            | <p>N= 41</p> <p><b>Dx:</b> first episode psychosis</p>                                       | <p>IPS + treatment as usual</p>                   | <p>control group</p> <p>The intervention group was able to find more jobs (23 compared to the control group's 3) 80% of the intervention group listed welfare benefits as their primary source of income</p>                                                     | <p>Acquiring jobs in a wide range of occupations that are congruent with personal interests and needs</p> |                                                                                                                                                                                                                                                                                                                                                                                    | <p>No follow up to determine whether a short 6-month intervention is sufficient to lead to lasting gains in employment and employment skills</p> |
| <p>Lindsay<sup>64*</sup></p> <p><b>Date:</b> 2011</p> | <p>CAN</p> | <p><b>Age Range:</b> 15-24</p> <p>N=1898</p> <p><b>Dx:</b> Teens with disabilities (all)</p> | <p>2006 Participation and Activity Limitation</p> | <p>Severity of disability, type and duration of disability, level of education, gender, low income, geographic location and the number of people living in the household all influenced the kind of barriers and work discrimination for these young people.</p> | <p>High school diploma</p> <p>Age (older +)</p> <p>More social capital</p>                                | <p>Low income</p> <p>Geographical location</p> <p>Family/Friends discourage youth</p> <p>Information about jobs is not adapted</p> <p>Family responsibilities</p> <p>Worry about isolation by other workers</p> <p>Been victim of discrimination in the past</p> <p>Inadequate training</p> <p>Inaccessible transportation</p> <p>Lost income support</p> <p>No jobs available</p> | <p>Dataset cross-sectional</p>                                                                                                                   |

| Study Information                                             | Country | Population                                                                                  | Type of Study and Intervention (If applicable)                                                                                     | Summary of Results                                                                                                                                                                                                                                                        | Facilitators to Employment                                                                                                                                                             | Barriers to Employment                                                                                                                                                                                       | Study Limitations                                                                                                                             |
|---------------------------------------------------------------|---------|---------------------------------------------------------------------------------------------|------------------------------------------------------------------------------------------------------------------------------------|---------------------------------------------------------------------------------------------------------------------------------------------------------------------------------------------------------------------------------------------------------------------------|----------------------------------------------------------------------------------------------------------------------------------------------------------------------------------------|--------------------------------------------------------------------------------------------------------------------------------------------------------------------------------------------------------------|-----------------------------------------------------------------------------------------------------------------------------------------------|
| Luciano Carpenter-Song <sup>73</sup><br><br><b>Date:</b> 2014 | USA     | <b>Age:</b> 22-32<br><br><b>N:</b> 12<br><br><b>Dx:</b> Psychosis<br>Substance use disorder | Cross-Sectional interview study<br><br><b>Intervention:</b> Explored past / current participation experiences with school & work   | This study examines the meaning and importance of career exploration and career development in the context of integrated treatment for young adults with early psychosis and substance use disorders.                                                                     | Prioritizing career oriented opportunities (not finding 'just a job')<br><br>Optimism in developing a career<br><br>External support<br><br>Prioritizing career-oriented opportunities | Family pushing for participants to obtain low wage / low skill jobs<br><br>Placement in job with no potential to advance<br><br>Decreased confidence                                                         | Data was cross-sectional, precluding causal interpretation<br><br>Study did not include:<br>· Women<br>· People with low socioeconomic status |
| Nochajski Schweitzer <sup>75</sup><br><br><b>Date:</b> 2014   | USA     | <b>Age:</b> 14-19<br><br><b>N:</b> 47<br><br><b>Dx:</b> Emotional + Behavioural disorders   | Qualitative<br><br><b>Intervention:</b> School-to-work transition program (STWTP) focusing on additional supports needed for youth | This study examines the transition of students with disabilities from high school to adult occupations, such as work and independent living. 30% of youth were still employed after the 10-week follow-up period                                                          | Transition program starting in the beginning of high school<br><br>Pay youth to participate in specific program                                                                        | Unemployment of parents<br><br>Family living in poverty<br><br>Substance use within family<br><br>Incarceration of prominent family member                                                                   | Only one diagnosis involved in study<br><br>Only youth enrolled in high school examined<br><br>Short follow-up period                         |
| Noel et al. <sup>72</sup><br><br><b>Date:</b> 2017            | USA     | <b>Age:</b> 16-24<br><br><b>N:</b> 280<br><br><b>Dx:</b> Psychiatric disorders              | Cross-sectional survey of young adults in IPS programs.<br><br><b>Intervention:</b> IPS                                            | Study team examined the barriers to employment for transition-age youth with disabilities enrolled in supported employment in eight community rehabilitation centers.<br><br>Employment team members identified each youth's top three barriers to employment using a 21- | Outreach of IPS team to the youth and the youth's family                                                                                                                               | <i>Lack of work experience, transportation problems, and program engagement issues.</i><br><br><i>Poor control of psychiatric symptoms</i><br><br>Families commonly discouraged their youth from employment. | Small amount of missing data<br><br>Unable to explore demographic differences                                                                 |

| Study Information                                        | Country     | Population                                                                                                                              | Type of Study and Intervention (If applicable)                                                                | Summary of Results                                                                                                                                                                                                                                | Facilitators to Employment                                                                                                                                                                     | Barriers to Employment                                   | Study Limitations                                                                     |
|----------------------------------------------------------|-------------|-----------------------------------------------------------------------------------------------------------------------------------------|---------------------------------------------------------------------------------------------------------------|---------------------------------------------------------------------------------------------------------------------------------------------------------------------------------------------------------------------------------------------------|------------------------------------------------------------------------------------------------------------------------------------------------------------------------------------------------|----------------------------------------------------------|---------------------------------------------------------------------------------------|
|                                                          |             |                                                                                                                                         |                                                                                                               | item checklist.                                                                                                                                                                                                                                   |                                                                                                                                                                                                |                                                          |                                                                                       |
| Porteous, Waghorn <sup>46</sup><br><br><b>Date:</b> 2009 | New Zealand | <b>Age:</b> 14-26<br><br>N= 135<br><br><b>Dx:</b> first episode psychosis (schizophrenia, major depression, bipolar affective disorder) | Implementation of fidelity scale to determine effectiveness of supported employment services for young adults | Occupational therapists and other allied health professionals can help facilitate system change towards the routine delivery of employment services integrated with public mental health treatment and care                                       | Co-location of employment services and publicly funded mental health services<br><br>Employment was identified as an unmet occupational need<br><br>Established in the early intervention team | Youth not being on the caseload for a mental health team | Exploratory and anecdotal nature of study                                             |
| Rinaldi et al. <sup>59</sup><br><br><b>Date:</b> 2004    | UK          | <b>Age:</b> 18-32<br>Median age: 21<br><br>N= 40<br><br><b>Dx:</b> First episode psychosis                                              | Pre-post study<br><br>Compared baseline to 6-month follow-up and 12 month follow-up                           | Employment:<br><b>Baseline:</b> 10% were employed, 55% were unemployed.<br><b>6 months:</b> 28% employed, 7% unemployed.<br><b>12 month:</b> 41% employed, 5% unemployed.<br>Everyone employed at 6 months, continued to be employed at 12 months | Participation in vocational intervention program<br><br>Team-based approach to recovery & employment<br><br>Proactively help participants retain and keep jobs<br><br>Welfare benefit advice   | Not addressed in article                                 | Only diagnosis was psychosis<br><br>Small sample size<br><br>Lack of comparison group |
| Rinaldi et al. <sup>84</sup><br><br><b>Date:</b> 2010    | UK          | <b>Age:</b> 17-32<br><br>N= 166<br><br><b>Dx:</b> Schizophrenia                                                                         | Pre/post design naturalistic evaluation<br><br>Supported education was delivered                              | 40% of participants were working/studying at start of intervention, this increased to 71% by 6 months<br><br>47% of those who were unemployed at baseline, achieved open employment                                                               | Transition from education/training to the labour market is critical for independence<br><br>Short work history is acceptable                                                                   | Not addressed in article                                 | No control group<br><br>Quality of life was not explored                              |

| Study Information                                          | Country | Population                                                                                                         | Type of Study and Intervention (If applicable)                                                                                    | Summary of Results                                                                                                                                                                                                         | Facilitators to Employment                                                                                                                                                                              | Barriers to Employment                                                                                                                                       | Study Limitations                                                                                                                                                                                                                              |
|------------------------------------------------------------|---------|--------------------------------------------------------------------------------------------------------------------|-----------------------------------------------------------------------------------------------------------------------------------|----------------------------------------------------------------------------------------------------------------------------------------------------------------------------------------------------------------------------|---------------------------------------------------------------------------------------------------------------------------------------------------------------------------------------------------------|--------------------------------------------------------------------------------------------------------------------------------------------------------------|------------------------------------------------------------------------------------------------------------------------------------------------------------------------------------------------------------------------------------------------|
|                                                            |         |                                                                                                                    |                                                                                                                                   | by 24 months follow up                                                                                                                                                                                                     | Use of a 'place and train' method                                                                                                                                                                       |                                                                                                                                                              |                                                                                                                                                                                                                                                |
| Tapfumaneyi et al. <sup>61</sup><br><br><b>Date:</b> 2015  | UK      | <b>Age:</b> 14-35<br><br>N= 1067<br><br><b>Dx:</b> Any mental health dx                                            | Naturalistic study<br>Intervention<br><br>Multidisciplinary service that focused on recovery and relapse prevention for 2-3 years | After 1 year 34.1% had been employed or studied towards a qualification<br><br>61.2% were in employment<br><br>50.4% were in educational courses employment/education at baseline                                          | Reduction in duration of untreated psychosis<br><br>Engagement in early intervention services for more than 1 year (compared to those engaged for less than 1 year)<br><br>Involvement in the IPS model | Welfare benefits (relatively high reward for being unemployed)<br><br>Stigma, discrimination<br><br>Lack of professional help<br><br>Illness related factors | Differences in outcomes between teams was not analyzed<br><br>The study was not able to control for premorbid functioning                                                                                                                      |
| Vander Stoep et al. <sup>67</sup><br><br><b>Date:</b> 2000 | USA     | <b>Age:</b> 18-21 years<br><br>N= 181<br><br><b>Dx:</b> Anxiety disorder, depressive disorder, disruptive disorder | Longitudinal study<br><br>Compares 33 participants with psychiatric disorder and 148 participants without psychiatric disorder    | 39.4% of participants with psychiatric disorder had not completed secondary school (6 times less likely than other youths to accomplish this task)<br><br>4.07 times less likely to be employed or in college/trade school | No diagnosis of psychiatric condition                                                                                                                                                                   | Diagnosis of a psychiatric condition                                                                                                                         | Examined multiple areas of life: gainful employment, criminal involvement, sexual activity, and secondary school completion.<br><br>Small numbers hampered the ability to draw firm conclusions about the magnitude of the effects of exposure |
| Veldman et                                                 | NDL     | <b>Age:</b> 11-19                                                                                                  | Prospective                                                                                                                       | Examines the etiology and                                                                                                                                                                                                  | Being diagnosed with                                                                                                                                                                                    | Mental health diagnosis                                                                                                                                      | Measuring the                                                                                                                                                                                                                                  |



| Study Information                                     | Country | Population                                                                                                                     | Type of Study and Intervention (If applicable)                                           | Summary of Results                                                                                                                                                       | Facilitators to Employment                                                                                                      | Barriers to Employment                                                                                                                                                                                                                                                                                                                                                                  | Study Limitations                                                                                                                                                                                         |
|-------------------------------------------------------|---------|--------------------------------------------------------------------------------------------------------------------------------|------------------------------------------------------------------------------------------|--------------------------------------------------------------------------------------------------------------------------------------------------------------------------|---------------------------------------------------------------------------------------------------------------------------------|-----------------------------------------------------------------------------------------------------------------------------------------------------------------------------------------------------------------------------------------------------------------------------------------------------------------------------------------------------------------------------------------|-----------------------------------------------------------------------------------------------------------------------------------------------------------------------------------------------------------|
| al. <sup>71</sup><br><br><b>Date:</b> 2015            |         | N: 1711<br><br><b>Dx:</b> Any mental health dx                                                                                 | cohort study<br><br>Intervention: Tracking Adolescents' Individual Lives Survey (TRAILS) | course of psychopathology<br>Study found that Mental health dx affect education and employment in negative ways                                                          | a mental illness later in life                                                                                                  | indicated as a high-stable trajectory, meaning they had serious mental illness at a younger age compared to others in the population                                                                                                                                                                                                                                                    | outcome at the same time point as the end of the trajectory, allowing reverse causation<br><br>Limited number of young adults at work without basic education level and in neither education nor training |
| Waghorn et al. <sup>60</sup><br><br><b>Date:</b> 2007 | AUS     | <b>Age:</b> 15-25<br><br><b>N:</b> 7<br><br><b>Dx:</b> Any mental health diagnosis Socially & economically marginalized people | Descriptive study<br><br>Intervention: Supported Employment                              | The study sought to determine what the major and minor <u>barriers</u> were when integrating supported employment services into already existing mental health services. | Setting clear goals throughout treatment<br><br>Establishing sustainable partnerships between the health and employment sectors | Time it takes to integrate vocational staff into mental health team<br><br>Lack of resources/ funding for programming<br><br>Differences in organizational cultures<br><br>Legal, insurance, and confidentiality issues<br><br>Large caseload size for employment specialists<br><br>Limited follow-up support<br><br>Having to participate in a program while not working / being paid | No clear number of population                                                                                                                                                                             |

1  
2  
3  
4  
5  
6  
7  
8  
9  
10  
11  
12  
13  
14  
15  
16  
17  
18  
19  
20  
21  
22  
23  
24  
25  
26  
27  
28  
29  
30  
31  
32  
33  
34  
35  
36  
37  
38  
39  
40  
41  
42  
43  
44  
45  
46  
47

| Study Information | Country | Population | Type of Study and Intervention (If applicable) | Summary of Results | Facilitators to Employment | Barriers to Employment                                                   | Study Limitations |
|-------------------|---------|------------|------------------------------------------------|--------------------|----------------------------|--------------------------------------------------------------------------|-------------------|
|                   |         |            |                                                |                    |                            | Additional training to vocational staff from a mental health perspective |                   |

Abbreviations: UK= United Kingdom; USA= United States of America; CAN= Canada; AUS= Australia; NDL= Netherlands; IPS= Individual Placement Support

Note: \*=Lindsay (2011) study included young people with all disabilities.

For peer review only

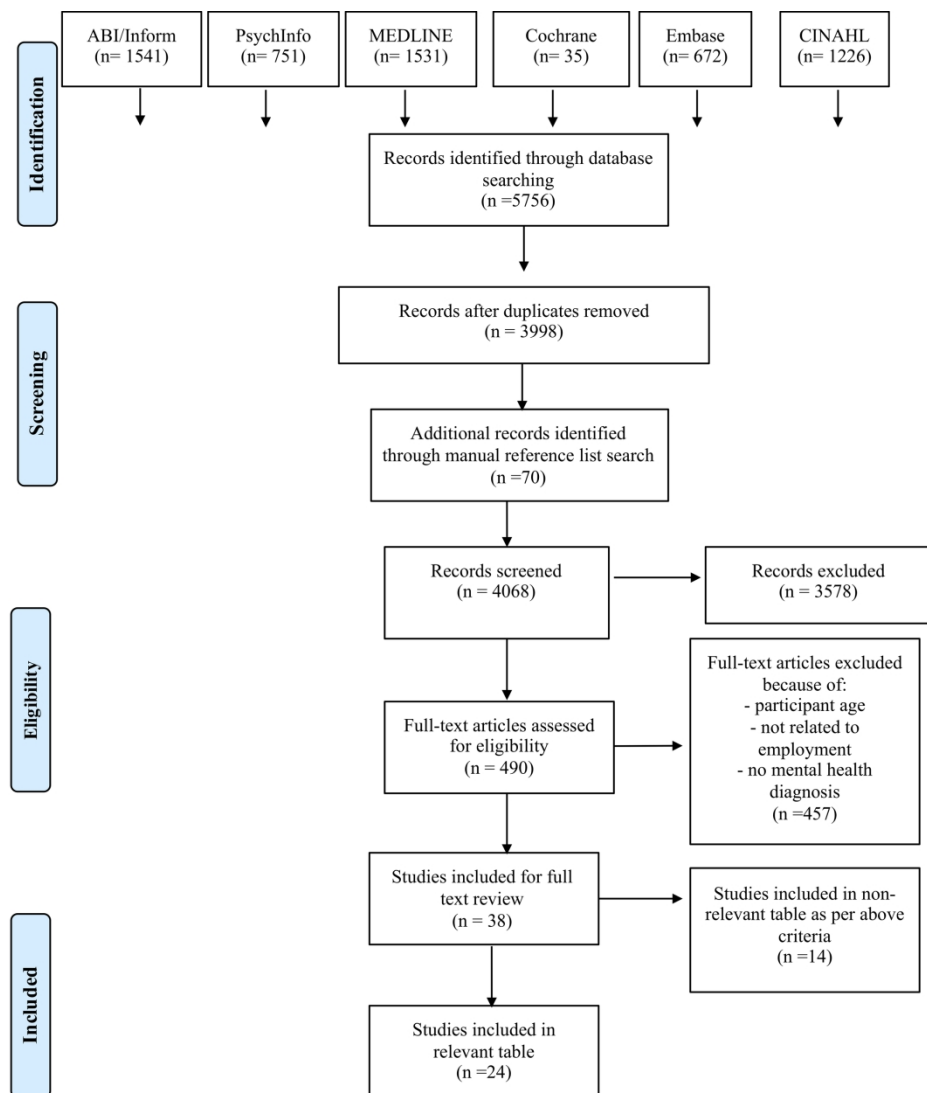

Figure 1. PRISMA diagram outlining study selection

226x246mm (300 x 300 DPI)

1  
2  
3  
4  
5  
6  
7  
8  
9  
10  
11  
12  
13  
14  
15  
16  
17  
18  
19  
20  
21  
22  
23  
24  
25  
26  
27  
28  
29  
30  
31  
32  
33  
34  
35  
36  
37  
38  
39  
40  
41  
42  
43  
44  
45  
46  
47  
48  
49  
50  
51  
52  
53  
54  
55  
56  
57  
58  
59  
60

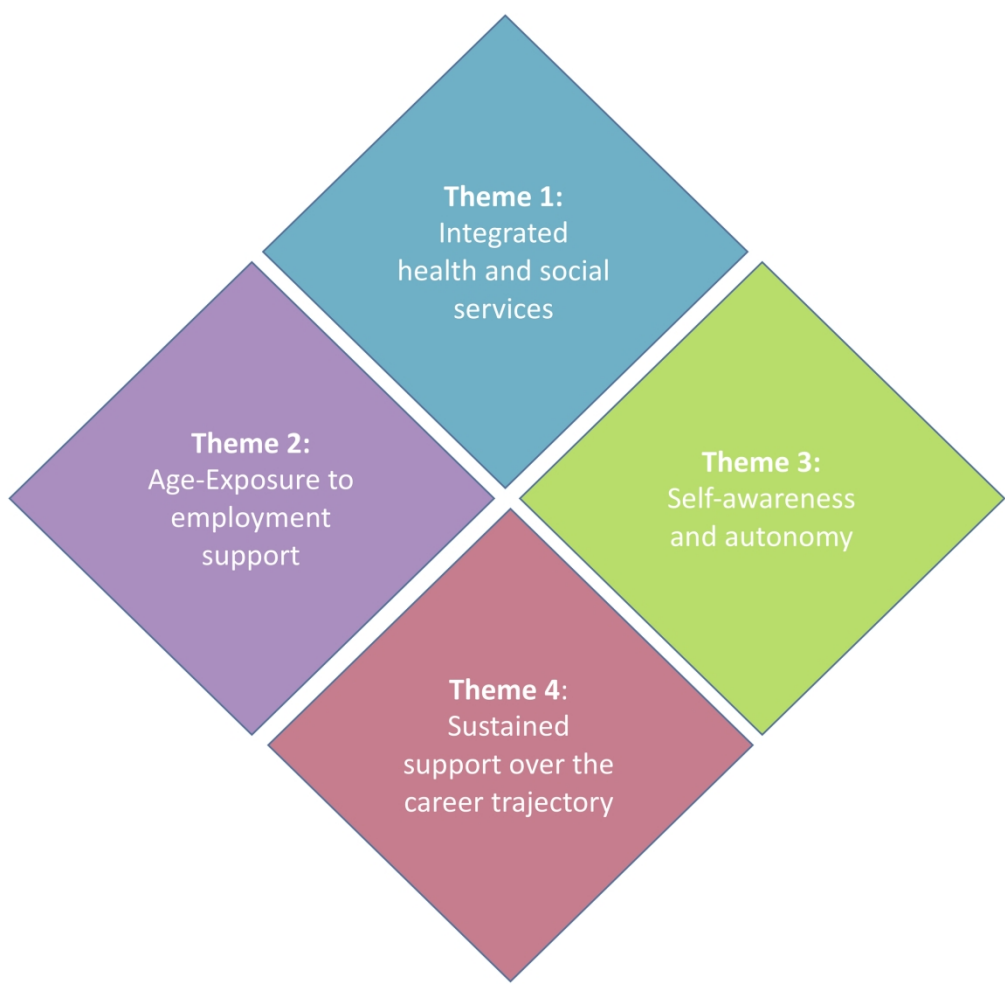

198x192mm (300 x 300 DPI)
